# Supplementary material for: Impact of COPD and asthma on in-hospital mortality and management of patients with heart failure in England and Wales: an observational analysis
Source: PubMed Central journal article supplement — BMJ Open. 2022 Jun 30;12(6):e059122. doi: 10.1136/bmjopen-2021-059122 (PMC9247695; doi:10.1136/bmjopen-2021-059122), 2022-06-30
Supplement: bmjopen-2021-059122.draft_revisions.pdf [file bmjopen-2021-059122.draft_revisions.pdf]

# BMJ Open

BMJ Open is committed to open peer review. As part of this commitment we make the peer review history of every article we publish publicly available.

When an article is published we post the peer reviewers' comments and the authors' responses online. We also post the versions of the paper that were used during peer review. These are the versions that the peer review comments apply to.

The versions of the paper that follow are the versions that were submitted during the peer review process. They are not the versions of record or the final published versions. They should not be cited or distributed as the published version of this manuscript.

BMJ Open is an open access journal and the full, final, typeset and author-corrected version of record of the manuscript is available on our site with no access controls, subscription charges or pay-per-view fees (<http://bmjopen.bmj.com>).

If you have any questions on BMJ Open's open peer review process please email [info.bmjopen@bmj.com](mailto:info.bmjopen@bmj.com)

# BMJ Open

## Impact of COPD and asthma on in-hospital mortality and management of patients with heart failure

|                               |                                                                                                                                                                                                                                                                                                                                                                          |
|-------------------------------|--------------------------------------------------------------------------------------------------------------------------------------------------------------------------------------------------------------------------------------------------------------------------------------------------------------------------------------------------------------------------|
| Journal:                      | <i>BMJ Open</i>                                                                                                                                                                                                                                                                                                                                                          |
| Manuscript ID                 | bmjopen-2021-059122                                                                                                                                                                                                                                                                                                                                                      |
| Article Type:                 | Original research                                                                                                                                                                                                                                                                                                                                                        |
| Date Submitted by the Author: | 10-Nov-2021                                                                                                                                                                                                                                                                                                                                                              |
| Complete List of Authors:     | Gulea, Claudia; Imperial College London; NIHR Imperial Biomedical Research Centre<br>Zakeri, Rosita; King's College London<br>Kallis, Constantinos; Imperial College London; NIHR Imperial Biomedical Research Centre<br>Quint, Jennifer; Imperial College London, Respiratory Epidemiology, Occupational Medicine and Public Health; National Heart and Lung Institute; |
| Keywords:                     | Heart failure < CARDIOLOGY, EPIDEMIOLOGY, RESPIRATORY MEDICINE (see Thoracic Medicine)                                                                                                                                                                                                                                                                                   |
|                               |                                                                                                                                                                                                                                                                                                                                                                          |

SCHOLARONE™  
Manuscripts

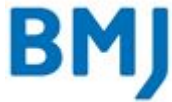

I, the Submitting Author has the right to grant and does grant on behalf of all authors of the Work (as defined in the below author licence), an exclusive licence and/or a non-exclusive licence for contributions from authors who are: i) UK Crown employees; ii) where BMJ has agreed a CC-BY licence shall apply, and/or iii) in accordance with the terms applicable for US Federal Government officers or employees acting as part of their official duties; on a worldwide, perpetual, irrevocable, royalty-free basis to BMJ Publishing Group Ltd ("BMJ") its licensees and where the relevant Journal is co-owned by BMJ to the co-owners of the Journal, to publish the Work in this journal and any other BMJ products and to exploit all rights, as set out in our [licence](#).

The Submitting Author accepts and understands that any supply made under these terms is made by BMJ to the Submitting Author unless you are acting as an employee on behalf of your employer or a postgraduate student of an affiliated institution which is paying any applicable article publishing charge ("APC") for Open Access articles. Where the Submitting Author wishes to make the Work available on an Open Access basis (and intends to pay the relevant APC), the terms of reuse of such Open Access shall be governed by a Creative Commons licence – details of these licences and which [Creative Commons](#) licence will apply to this Work are set out in our licence referred to above.

Other than as permitted in any relevant BMJ Author's Self Archiving Policies, I confirm this Work has not been accepted for publication elsewhere, is not being considered for publication elsewhere and does not duplicate material already published. I confirm all authors consent to publication of this Work and authorise the granting of this licence.

1  
2  
3 **Title:** Impact of COPD and asthma on in-hospital mortality and management of patients with  
4 heart failure  
5  
6  
7

8 **Authors:** Claudia Gulea<sup>1, 2</sup>, Rosita Zakeri<sup>3</sup>, Constantinos Kallis<sup>1, 2</sup>, Jennifer K. Quint<sup>1, 2</sup>  
9  
10  
11  
12  
13

#### 14 **Affiliations**

15  
16  
17 <sup>1</sup> National Heart and Lung Institute, Imperial College London, UK  
18  
19

20 <sup>2</sup> NIHR Imperial Biomedical Research Centre  
21  
22

23 <sup>3</sup> British Heart Foundation Centre for Research Excellence, King's College London, UK  
24  
25  
26  
27

28 **Corresponding author:** Claudia Gulea  
29  
30

31 Email address: [c.gulea18@imperial.ac.uk](mailto:c.gulea18@imperial.ac.uk)  
32  
33

34 Address: G05, Emmanuel Kaye Building, 1B Manresa Road, National  
35 Heart and Lung Institute, Imperial College London, United Kingdom  
36  
37

38 Telephone: +44 (0) 20 7594 7987  
39  
40  
41  
42  
43  
44  
45  
46  
47

48 **Word count:** 2,991  
49  
50  
51  
52  
53  
54  
55  
56  
57

## Abstract

**Objective:** To evaluate the association between having concomitant COPD or asthma, and in-patient mortality and post-discharge management among patients hospitalised for acute HF.

**Setting:** Data were obtained from patients enrolled in the National Heart Failure Audit.

**Participants:** 217,329 patients hospitalised for HF in England-Wales between March 2012 and 2018.

**Outcomes:** In-hospital mortality, referrals to cardiology follow-up and prescriptions for HF medications were compared between patients with comorbid COPD (COPD-HF) or asthma (asthma-HF) versus HF-alone using mixed-effects logistic regression.

**Results:** Patients with COPD-HF were more likely to die during hospitalisation, and those with asthma-HF had a reduced likelihood of death, compared with patients who had HF-alone. In patients who survived to discharge, referral to HF follow-up services differed between groups: COPD-HF patients had reduced odds of cardiology follow-up, whilst cardiology referral odds for asthma-HF were similar to HF-alone. Overall, proportions of HF medication prescriptions at discharge were low for both COPD-HF and asthma-HF groups, particularly prescriptions for beta-blockers.

**Conclusions:** In this nationwide analysis, we showed that COPD and asthma significantly impact the clinical course in patients hospitalised for HF. COPD is associated with higher in-patient mortality and lower cardiology referral odds, whilst COPD and asthma are both associated with lower use of prognostic HF therapies on discharge. These data highlight therapeutic gaps and a need for better integration of cardiopulmonary services to improve healthcare provision for patients with HF and coexisting respiratory disease.

1  
2  
3 **Keywords:** heart failure, chronic obstructive pulmonary disease, asthma  
4  
5  
6  
7  
8  
9  
10  
11  
12  
13  
14  
15  
16  
17  
18  
19  
20  
21  
22  
23  
24  
25  
26  
27  
28  
29  
30  
31  
32  
33  
34  
35  
36  
37  
38  
39  
40  
41  
42  
43  
44  
45  
46  
47  
48  
49  
50  
51  
52  
53  
54  
55  
56  
57  
58  
59  
60

For peer review only

### Strengths and limitations

- This is the first study generalisable to the population of England-Wales which evaluates the effect of respiratory disease on in-hospital mortality and management outcomes in patients hospitalized with HF.
- HF diagnosis was based either on diagnostic tests of clinical investigations which limited misclassification bias.
- The large proportion of missing data regarding bronchodilators and inhaled corticosteroids prescriptions prevented evaluation of whether the impact of COPD and asthma on outcomes in patients with HF is mediated by the treatment for their respiratory disease.

## Introduction

COPD and asthma frequently coexist with HF and are independently associated with mortality and increased healthcare use<sup>1,2</sup>. This has been explained by shared systemic inflammation, worsened by the presence of pulmonary disease as well as sub-optimal HF management<sup>3</sup>.

Evidence suggests that patients with HF and comorbid COPD are less likely to receive guideline recommended treatment for their HF. For example, beta-blockers which are used in the management of HF with reduced ejection fraction (HFrEF) are often not prescribed to patients with COPD, due to fear of bronchoconstriction, reduced effectiveness of emergency beta-agonist medication or difficulty in discriminating between COPD and asthma.

Less data exist on the relationship between asthma and HF. Some studies have shown that asthma is associated with an increased occurrence of cardiovascular disease whilst others suggest this is limited to women or smokers<sup>4</sup> and depends on age of asthma-onset<sup>5</sup>. This is further complicated by a component of chronic irreversible airflow obstruction in some people with long standing asthma, associated with a reduced response to asthma therapy<sup>6</sup>. This may, in turn, affect treatment choices in this group of patients and increase vulnerability to adverse events, versus either disease occurring alone. The use of beta-agonists or inhaled corticosteroids in both COPD and asthma has been associated with HF-onset, HF-related hospitalisation and increase in cardiovascular events<sup>7</sup>, which depend on disease severity and study setting, but nevertheless worsen prognosis<sup>1,5</sup>.

Our main aim was to compare in-hospital mortality and post-discharge HF management (referrals to HF services, discharge medication) among patients admitted to hospital with decompensated HF, with and without COPD or asthma in a sample of patients from the



1  
2  
3 National Heart Failure Audit (NHFA) from England and Wales. We also investigated whether  
4  
5  
6  
7  
8  
9  
10  
11  
12  
13  
14  
15  
16  
17  
18  
19  
20  
21  
22  
23  
24  
25  
26  
27  
28  
29  
30  
31  
32  
33  
34  
35  
36  
37  
38  
39  
40  
41  
42  
43  
44  
45  
46  
47  
48  
49  
50  
51  
52  
53  
54  
55  
56  
57  
58  
59  
60  
ejection fraction (EF) status affects outcomes in these patient groups.

## 8 **Methods**

11 We included patients older than 18 years of age admitted to hospital for HF between March  
12  
13  
14  
15  
16  
17  
18  
19  
20  
21  
22  
23  
24  
25  
26  
27  
28  
29  
30  
31  
32  
33  
34  
35  
36  
37  
38  
39  
40  
41  
42  
43  
44  
45  
46  
47  
48  
49  
50  
51  
52  
53  
54  
55  
56  
57  
58  
59  
60  
We included patients older than 18 years of age admitted to hospital for HF between March  
2012 to April 2018 whose data were submitted to the NHFA. We considered their first HF  
hospitalisation only (**Supplemental Methods**).

## 18 **Exposures**

21  
22  
23  
24  
25  
26  
27  
28  
29  
30  
31  
32  
33  
34  
35  
36  
37  
38  
39  
40  
41  
42  
43  
44  
45  
46  
47  
48  
49  
50  
51  
52  
53  
54  
55  
56  
57  
58  
59  
60  
**COPD** was defined as having a history of COPD - chronic bronchitis and/or emphysema,  
confirmed by spirometry or beta agonist/steroid inhaler use.

**Asthma** was defined as having a history of childhood asthma and atopy or having an asthma  
diagnosis confirmed by a respiratory physician.

No diagnostic test results were provided for COPD or asthma, and for the purposes of this work  
were based on being recorded as “yes” (present) or “no” (absent) in the audit data as defined  
above.

**EF status** was defined as HFrEF and HF with preserved EF (HFpEF), determined through  
echocardiography, MRI, nuclear scan, or angiogram. Those with an EF <40% were categorised  
HFrEF. Due to a lack of information regarding specific diagnostic tests required to make a HFpEF  
diagnosis, we determined HFpEF as patients not categorised as HFrEF<sup>8</sup>.

**Covariates** were age, sex, New York Heart Association [NYHA] classification and place of care  
(cardiology ward vs. other place of care [i.e., general ward]) and comorbidities (atrial fibrillation

1  
2  
3 [AF], ischemic heart disease [IHD], diabetes, valve disease, hypertension [**Supplementary Table**  
4  
5  
6 **3**]).

## 8 9 **Outcomes**

10  
11 Our primary outcome was in-hospital death during the index event (HF admission), defined as a  
12  
13 dichotomised variable (died/alive at discharge), according to COPD or asthma status. Secondary  
14  
15 analyses included post-discharge referral to HF services (cardiology, HF nurse, HF MDT  
16  
17 [multidisciplinary team]) and prescriptions for HF medications at discharge in those with HFrEF.  
18  
19

## 20 21 22 **Statistical analysis**

23  
24 Differences in baseline characteristics between patients with COPD-HF/Asthma-HF and HF  
25  
26 alone are presented using percentages for categorical variables and medians and interquartile  
27  
28 ranges [IQR]. We assessed differences between groups using chi-square and Kruskal-Wallis  
29  
30 tests. We assessed differences in outcomes between patients with COPD-HF compared with HF  
31  
32 alone and between asthma-HF compared with HF-alone using multilevel logistic regression with  
33  
34 a random effect for hospital, to calculate odds ratios (OR) and 95% confidence intervals (CI)  
35  
36  
37  
38  
39 **(Supplemental Methods)**. In the main analysis, we adjusted for confounders with less than 20%  
40  
41 missing data: age, sex, comorbidities, place of care and NYHA status. The model building  
42  
43 process is presented in **Supplementary Table 4**. Analyses of referrals were conducted similarly  
44  
45 and excluded patients who died in-hospital. Associations between COPD or asthma and beta-  
46  
47 blocker prescriptions at discharge excluded those with HFpEF.  
48  
49  
50  
51

## 52 53 **Sensitivity analyses**

1  
2  
3 Due to potential confounding, smoking and Body Mass Index (BMI) were multiply imputed  
4  
5 using a multilevel approach (**Supplemental methods**). We also repeated the main analysis in a  
6  
7 cohort of patients including only a “confirmed HF diagnosis” (ICD-10 HF diagnosis confirmed by  
8  
9 imaging/BNP testing, or adjudicated by a clinician in the absence of echocardiography)<sup>9</sup>.

10  
11  
12  
13 Analyses were performed with R v4.0.3.

## 14 15 16 **Results**

17  
18  
19  
20 Baseline characteristics are presented in **Table 1**. In total, 217,329 patients were admitted to  
21  
22 hospital in England-Wales due to decompensated HF between 2012 and 2018, with data on  
23  
24 COPD/asthma status available (**Supplemental Figure 1**). The median age was 81 years (IQR 72-  
25  
26 87) and 53.7% were male. Death occurred in 12% of patients. COPD was diagnosed in 15% of  
27  
28 patients and asthma in 6.6%. Most patients were characterised by either marked or severe  
29  
30 breathlessness and half had a recorded HF management plan in place at discharge. Length of  
31  
32 stay and deprivation ranking did not differ significantly between patients with COPD-HF,  
33  
34 asthma-HF and HF alone. COPD-HF patients were mostly male, were less often admitted to  
35  
36 cardiology and were more frequently diagnosed with IHD compared with those with HF alone;  
37  
38 hypertension was slightly less common among COPD-HF patients, whereas diabetes was more  
39  
40 common. The proportion of patients with HFpEF was marginally higher in the COPD-HF group,  
41  
42 compared with the HF-only group. Asthma-HF patients were mostly female, with higher levels  
43  
44 of diabetes and hypertension compared to HF-only. Conversely, AF was less common in the  
45  
46 asthma-HF compared with the HF-alone group; there were also more patients with HFpEF.

### 47 48 49 *In-hospital death*

1  
2  
3 The association between COPD and in-hospital death, is presented in **Figure 1, Table 2, and**  
4  
5 **Supplementary Table 5**. Overall, COPD was independently associated with increased odds of in-  
6 hospital death ([adjusted]OR<sub>adj</sub>, 95% CI: 1.10, 1.06-1.14). The relationship between COPD and  
7  
8 in-hospital death differed according to EF: COPD was associated with an increase in mortality in  
9  
10 in-hospital death differed according to EF: COPD was associated with an increase in mortality in  
11 patients with HFrEF (OR<sub>adj</sub>: 1.15, 1.09 – 1.21), but not in those with HFpEF (OR<sub>adj</sub>: 1.05, 0.99–  
12  
13 1.10).

14  
15  
16  
17  
18 Conversely, asthma was associated with a decrease in the odds of in-hospital death compared  
19 with HF patients without asthma (OR<sub>adj</sub>, 95%CI: 0.85, 0.79-0.88). The odds of death did not vary  
20  
21 by EF status for patients with asthma-HF (**Figure 1, Table 2**).

22  
23 Sensitivity analyses where smoking status and BMI were imputed (**Supplementary Table 6**), and  
24  
25 where patients with a confirmed HF diagnosis only were included (**Supplementary Table 7**),  
26  
27 showed similar results to the main analysis.

### 28 29 30 31 32 33 34 *Referrals to HF services*

35  
36  
37 In the fully adjusted models, COPD was associated with decreased likelihood of outpatient  
38 referral to a cardiologist (OR<sub>adj</sub>, 95%CI 0.79, 0.77-0.81) and to a HF-MDT (OR<sub>adj</sub>, 95% CI 0.94,  
39  
40 0.91-0.97). Patients with COPD-HFrEF were less likely to be referred to a cardiologist than those  
41  
42 with HFrEF without COPD (OR<sub>adj</sub>: 0.85, 95% CI 0.81-0.88) while patients with COPD-HFpEF were  
43  
44 significantly less likely to be referred, compared to HFpEF without COPD (OR<sub>adj</sub>, 95%CI% 0.73,  
45  
46 0.70-0.76). COPD was associated with a decreased likelihood of documented HF-MDT referral  
47  
48 only for patients with HFpEF (OR<sub>adj</sub>, 95%CI, 0.90, 0.86-0.94).

1  
2  
3 Overall, referral odds did not differ in patients with asthma-HF compared to those with HF-  
4  
5 alone. There was a significant increase in the odds of referral to a cardiologist for those with  
6  
7 asthma-HFrEF ( $OR_{adj}$ , 95%CI 1.08, 1.03-1.14) and a decreased likelihood of referral for patients  
8  
9 with asthma-HFpEF ( $OR_{adj}$  95CI, 0.93, 0.88-0.98), compared to HFrEF, HFpEF-alone, respectively.  
10  
11 Referrals to HF nurse or HF MDT were not different between those with HF alone or HF and  
12  
13 asthma (**Figure 2**).

#### 14 15 16 17 18 *HF medication prescription at discharge*

19  
20  
21 Patients with COPD-HF had lower prescription proportions of ACEIs/ARBs, beta-blockers and  
22  
23 double (ACEi/ARB+beta-blocker) and triple-therapy (ACEi/ARB+beta-blocker+MRA) compared  
24  
25 to those with HF-only. ACEIs/ARBs, MRAs and triple-therapy were prescribed more frequently  
26  
27 in the asthma-HF group compared with the HF-alone group; however beta-blockers or double-  
28  
29 therapy were less often prescribed for asthma-HF vs. HF-alone (**Figure 3**).

30  
31  
32 In patients with HFrEF, COPD and asthma were associated with decreased likelihood of beta-  
33  
34 blocker prescription at discharge ( $OR_{adj}$  0.66, 95%CI 0.59-0.67,  $OR_{adj}$ : 0.57, 95%CI 0.54-0.60).

35  
36  
37 COPD was associated with lower chance of ACEi/ARB prescription, but did not affect MRA  
38  
39 prescriptions, while asthma was associated with increased odds of ACEi/ARB and MRA (**Table**  
40  
41  
42  
43  
44  
45  
46  
47  
48  
49  
50  
51  
52  
53  
54  
55  
56  
57  
58  
59  
60  
**3**).

## 61 62 63 64 65 66 67 68 69 70 **Discussion**

This is the first study to provide a large assessment of contemporary HF practice, generalisable to the population of England-Wales, evaluating the effect of COPD and asthma on clinical and management outcomes. We found that patients with COPD-HF were more likely to die during

1  
2  
3 their HF admission, compared to patients with HF-only; those with asthma-HF had a reduced  
4  
5 probability of in-hospital death, compared to patients with HF-alone. Referrals to HF services  
6  
7 also differed: COPD was associated with a 21% reduction in post-discharge cardiology referral  
8  
9 whilst a diagnosis of asthma did not affect this outcome.  
10  
11

12  
13 Airways diseases, particularly COPD is associated with adverse events in patients with HF<sup>1-3 10-12</sup>,  
14  
15 however diagnostic misclassification is under-estimated and studies of the independent effect  
16  
17 of asthma are lacking. We report several findings which add to previous literature.  
18  
19

20  
21 The finding that COPD is associated with in-hospital mortality confirms reports from previous  
22  
23 European data which considered longer term follow-ups<sup>13 14</sup>. A greater severity of  
24  
25 cardiovascular disease amongst those with COPD-HF may have contributed to the increase in  
26  
27 mortality, as indicated by the higher proportions of patients in NYHA classes III and IV,  
28  
29 compared with those with HF alone. Further explanations could include admission to non-  
30  
31 cardiology wards for COPD-HF patients, which has been linked with poorer outcomes in acute  
32  
33 HF<sup>15</sup>.  
34  
35  
36  
37

38  
39 A COPD diagnosis was associated with increased in-hospital death in those with HFrEF, but not  
40  
41 in those with HFpEF, which is surprising, given that COPD is suggested to be more severe in the  
42  
43 latter group<sup>16</sup>. In contrast with our report, previous studies found that risk of death is increased  
44  
45 in those with COPD-HFpEF compared to COPD-HFrEF<sup>17 18</sup>, however these may be confounded by  
46  
47 a lack of validity of EF status (inferred by ICD codes rather than echocardiography) or  
48  
49 spirometry to confirm COPD status, consideration of long-term rather than short term effects  
50  
51 on mortality, or by including chronic rather than hospitalised HF. Our result therefore may be  
52  
53 explained by poor uptake of disease-modifying treatments available for HFrEF in those with  
54  
55  
56  
57  
58  
59  
60

1  
2  
3 COPD<sup>13</sup>, which has been previously reported and could be more pronounced in a cohort of  
4  
5 patients newly admitted for HF.  
6

7  
8 After adjusting for age, sex and other baseline characteristics including comorbidities, and  
9  
10 further adjustments for smoking status and BMI, differences between those with and without  
11  
12 COPD, respectively asthma, did not materially change the association between the two lung  
13  
14 diseases with in-hospital mortality. This suggests an independent contribution of COPD to  
15  
16 increased mortality in patients hospitalised with HF, significant beyond the potential  
17  
18 confounders considered in this analysis.  
19  
20  
21  
22

23 While previous reports suggest asthma is associated with increased risk of developing  
24  
25 cardiovascular disease<sup>4</sup>, no prior study has reported on the association between asthma and  
26  
27 death during acute HF hospitalisation. We found that, on average, asthma was independently  
28  
29 associated with a 24% reduction in risk of death in patients with HF. The mechanisms  
30  
31 underlying this epidemiological association are unclear. Several factors may explain our result.  
32  
33 Asthma management is reliant on anti-inflammatory agents such as inhaled corticosteroids  
34  
35 (ICS), which have been linked to cardioprotective effects<sup>19 20</sup> including lower all-cause mortality  
36  
37 and lower risk of myocardial infarction ([MI], a precursor to HF). Potential long-term ICS use in  
38  
39 our asthma-HF cohort could have diminished patients' baseline mortality risk.  
40  
41  
42  
43  
44  
45

46 The nature of inflammation is different in COPD compared with asthma, and influences  
47  
48 response to medication. One hypothesis which may underlie the diverging findings on the  
49  
50 effect of the two lung diseases on outcomes in patients with HF thus relates to differences in  
51  
52 management and their subsequent differential cardiovascular risk. Bronchodilator medications,  
53  
54 which are central to the symptomatic treatment of COPD, have been associated with increased  
55  
56  
57  
58  
59  
60

1  
2  
3 cardiovascular risk<sup>7</sup>. While combination treatments such as ICS/LABA may have a good  
4  
5 cardiovascular safety profile in asthma, this differs in COPD<sup>6 12</sup>. RCTs have not demonstrated  
6  
7 mortality benefits with ICS in individuals with COPD, although some observational studies  
8  
9 suggest the opposite. Since both lung diseases were diagnosed prior to HF admission, it would  
10  
11 be plausible to assume that any effects of long-term pulmonary medication could influence the  
12  
13 chance of death in our cohort. Thus, the heightened risk of in-hospital mortality observed in the  
14  
15 COPD-HF group, but not in asthma-HF could be related to more frequent use of bronchodilators  
16  
17 and a poorer safety profile of ICS in COPD compared to asthma. Alternatively, COPD-specific  
18  
19 characteristics such as such as progressive lung function decline may have influenced in-  
20  
21 hospital mortality in those admitted for HF.  
22  
23  
24  
25  
26

27  
28 The association between COPD/asthma and referral to follow-up cardiology services has not  
29  
30 been studied before in hospitalised HF patients. Overall, patients with COPD-HF were less likely  
31  
32 to be referred to a cardiology service after hospital discharge, compared with those who had  
33  
34 HF-alone. This indicates that a COPD diagnosis may be an obstacle preventing access to HF  
35  
36 specialist care. According to NICE, all patients with a HF diagnosis need to be seen by a HF  
37  
38 specialist within two weeks of discharge, but data suggest these timelines are not met<sup>21</sup>. The  
39  
40 compounded effect of a COPD diagnosis has the potential to further impair the long-term  
41  
42 prognosis of these comorbid patients. Our study also indicated EF status mediated the  
43  
44 relationship with referrals, as individuals with COPD-HFpEF were less likely to have an  
45  
46 appointment compared with their COPD-HFrEF counterparts. This is particularly worrying as HF,  
47  
48 irrespective of EF, is best monitored and managed within specialist HF teams.  
49  
50  
51  
52  
53  
54  
55  
56  
57  
58  
59  
60



1  
2  
3 Asthma did not adversely influence referrals to HF services, but we identified an increased  
4  
5 likelihood of referral to cardiology in asthma-HFpEF as compared with asthma-HFrEF. One  
6  
7 possible explanation is greater uncertainty in clinical management of patients with HFpEF,  
8  
9 leading to increased referral, though this needs to be assessed in future studies. Clarifying these  
10  
11 clinical management pathways offers a potential to improve HF prognosis by ensuring access to  
12  
13 care is timely and tailored to individual patients' risk, pathology, and health.  
14  
15

16  
17  
18 Patients with COPD-HFrEF were 34% less likely to receive a beta-blocker prescription at  
19  
20 discharge, compared with patients with HFrEF alone, despite recent data supporting use of  
21  
22 these agents in COPD<sup>22 23</sup>. Similar to data on patients post-MI<sup>24</sup>, it is worrying that COPD was  
23  
24 also associated with decreased likelihood of guideline recommended ACEi/ARB prescription in  
25  
26 those with HF, as there is no contraindication for those with pulmonary disease. Efforts need to  
27  
28 be made to ensure appropriate therapeutic management of these patients.  
29  
30

31  
32  
33 Those with asthma-HFrEF had 43% less chance of being prescribed a beta-blocker compared  
34  
35 with patients with HF-alone. Current guidelines recommend that asthma patients with chronic  
36  
37 HFrEF should not receive disease-modifying beta-blocker treatment due to possible  
38  
39 bronchoconstriction, despite evidence to suggest that cardioselective beta-blockade may be  
40  
41 used with careful up-titration and monitoring<sup>25 26</sup>, where benefits may outweigh risks in  
42  
43 individual patients. Based on the low uptake across the whole spectrum of HF medications in  
44  
45 patients with additional lung disease (**Figure 3**), we expect these patients would have worse  
46  
47 prognosis compared to their more adequately treated counterparts.  
48  
49  
50  
51  
52  
53  
54  
55  
56  
57  
58  
59  
60

1  
2  
3 Considering these results, management needs to be optimized in patients with COPD or asthma  
4 and concurrent HF. The arrival of new treatments such as sodium-glucose co-transporter 2  
5 inhibitors (SGLT2-i) have widened treatment choice in HFrEF, and there is now evidence  
6 supporting their use in individuals with COPD<sup>27</sup>. Given the contraindication of beta-blockers in  
7 asthma, these new treatments should urgently be assessed in this population, as data are  
8 currently lacking.  
9

### 18 **Strengths and limitations**

20  
21 The main strength of this study is the large sample size and validity of diagnoses used, which  
22 were based either on diagnostic tests or clinical investigations. We did not however have  
23 information on duration and severity of asthma or COPD, nor lung function test results and thus  
24 we could not verify accuracy of these diagnoses, which are often subject to misclassification,  
25 especially in the elderly<sup>28</sup>. We also could not differentiate between childhood asthma or late-  
26 onset asthma which may have different implications<sup>29</sup>.  
27

28  
29 HFpEF was determined as a HF diagnosis without systolic dysfunction, which has been used in  
30 previous NHFA reports. Nevertheless, there is no consensus gold standard HFpEF diagnosis<sup>8</sup> and  
31 it remains difficult to validate. Further work in this area is needed, particularly in accurately  
32 distinguishing between HFpEF and COPD, which have similar clinical presentation<sup>3</sup>.  
33

34  
35 There was a considerable proportion of missing data on bronchodilators/inhaled corticosteroids  
36 in the dataset which prevented assessment of whether the impact of COPD and asthma on  
37 outcomes is mediated, in part, by their treatment.  
38  
39  
40  
41  
42  
43  
44  
45  
46  
47  
48  
49  
50  
51  
52  
53

1  
2  
3 Smoking status was also characterised by a large percentage of missing data, however an  
4  
5 analysis using multiple imputation indicated that even after adjusting for this confounder, the  
6  
7 association between both COPD and asthma on in-hospital mortality remained unchanged  
8  
9  
10 **(Supplementary Table 6).**

11  
12  
13 We only focused on decompensated HF and the picture may change when investigating long-  
14  
15 term mortality, recurrent admissions, or other aspects of treatment such as medication  
16  
17 adherence.  
18  
19

20  
21 While the referral likelihood estimates provide a first glimpse into the association between  
22  
23 COPD/asthma and potential healthcare service provision for HF patients in England-Wales, we  
24  
25 did not have access to data on concrete healthcare utilisation amongst our cohort.  
26  
27

28  
29 Due to lack of data, we could not establish whether cause of death varied amongst the groups  
30  
31 and whether the increased mortality associated with COPD was underlined by higher rates of  
32  
33 respiratory versus cardiac or other disease.  
34  
35

## 36 37 **Conclusion**

38  
39  
40 This analysis adds to the growing body of evidence that COPD and asthma affect outcomes in  
41  
42 patients with acute HF. Our data suggest that while COPD is a main contributor to in-hospital  
43  
44 mortality and is associated with decreased referral to cardiology services amongst HF patients,  
45  
46 asthma does not negatively impact these outcomes. Both lung diseases are however  
47  
48 responsible for significant decreases in the prescription of HF treatments at discharge,  
49  
50 particularly beta-blockers. These findings highlight a need for better integration of  
51  
52 cardiopulmonary services with an aim to tailor healthcare provision for these patients.  
53  
54  
55  
56  
57

### Competing interests

CG, CK and RZ have nothing to declare. Prof. Quint's research group has received funds from AZ, GSK, The Health Foundation, MRC, British Lung Foundation, IQVIA, Chiesi, and Asthma UK outside the submitted work; grants and personal fees from GlaxoSmithKline, Boehringer Ingelheim, AstraZeneca, Bayer, Insmmed outside the submitted work.

### Data availability

The data that support the findings of this study have been provided by the Healthcare Quality Improvement Partnership from the National Heart Failure Audit Programme, but restrictions apply to the availability of these data and so are not publicly available.

### Financial disclosure

CG is funded by a NHLI PhD studentship. Grant number: N/A.

### Author contributions

Conceptualization & Methodology: CG, JKQ, CK. Original draft: CG. Editing and final approval: CG, JKQ, RZ, CK; Data curation & Formal data analysis: CG; Data acquisition: JKQ.

### Ethics approval

This study involved analysis of pre-existing, de-identified data, thus it was exempt from Institutional Review Board approval.

### Patient and public involvement

Patients were not involved in the design and conduct of the study.

### Figure legends

Figure 1 - Association between COPD, asthma and in-hospital death, adjusted for age, sex, valve disease; IHD, hypertension, diabetes, AF, NYHA, place of care and EF status; odds ratio with 95% confidence intervals.

Figure 2. Association between COPD, asthma and referrals to HF services, adjusted for age, sex, valve disease; IHD, hypertension, diabetes, AF, NYHA, place of care and EF status.

Figure 3. HF-medication prescription rates according to comorbid respiratory disease status

**Table 1.** Baseline characteristics according to COPD and asthma status, in patients hospitalised for HF in England-Wales.

|                           | <b>HF alone<br/>(N=170297)</b> | <b>COPD + HF<br/>(N=32695)</b> | <b>Asthma + HF<br/>(N=14400)</b> | <b>Overall<br/>(N=217,392)</b> |
|---------------------------|--------------------------------|--------------------------------|----------------------------------|--------------------------------|
| Age, median [IQR]         | 81 [72, 88]                    | 79 [72, 85]                    | 79 [69, 86]                      | 81 [72, 87]                    |
| Missing                   | 67 (0.1%)                      | 22 (0.1%)                      | 10 (0.1%)                        | 199 (0.1%)                     |
| Male                      | 91837 (53.9%)                  | 19072 (58.3%)                  | 5936<br>(41.2%)                  | 116845 (53.7%)                 |
| Missing                   | 74 (0.1%)                      | 44 (0.1%)                      | 21 (0.1%)                        | 239 (0.1%)                     |
| <b>Place of admission</b> |                                |                                |                                  |                                |
| Cardiology                | 76428 (44.9%)                  | 12361 (37.8%)                  | 6147<br>(42.7%)                  | 94936 (43.7%)                  |
| Other                     | 93358 (54.8%)                  | 20246 (61.9%)                  | 8218<br>(57.1%)                  | 21822 (56.0%)                  |
| Missing                   | 511 (0.3%)                     | 88 (0.3%)                      | 35 (0.2%)                        | 634 (0.3%)                     |
| <b>Died in-hospital</b>   | 20316 (11.9%)                  | 4181 (12.8%)                   | 1337 (9.3%)                      | 25834 (11.9%)                  |
| <b>Device therapy</b>     |                                |                                |                                  |                                |
| None                      | 147485 (86.6%)                 | 28962 (88.6%)                  | 12818<br>(89.0%)                 | 189265 (87.1%)                 |
| CRT-D                     | 3047 (1.8%)                    | 496 (1.5%)                     | 189 (1.3%)                       | 3732 (1.7%)                    |
| CRT-P                     | 1681 (1%)                      | 296 (0.9%)                     | 142 (1%)                         | 2119 (1.0%)                    |
| ICD                       | 3001 (1.8%)                    | 511 (1.6%)                     | 211 (1.5%)                       | 0 (0%)                         |
| Missing                   | 15083 (8.9%)                   | 2430 (7.4%)                    | 1040 (7.2%)                      | 18553 (8.5%)                   |
| <b>Comorbidities</b>      |                                |                                |                                  |                                |
| Valve disease             | 38213 (22.4%)                  | 7005 (21.4%)                   | 2906<br>(20.2%)                  | 48124 (22.1%)                  |
| Missing                   | 3426 (2.0%)                    | 822 (2.5%)                     | 335 (2.3%)                       | 4583 (2.1%)                    |
| IHD                       | 65992 (38.8%)                  | 14198 (43.4%)                  | 5175<br>(35.9%)                  | 85365 (39.3%)                  |
| Missing                   | 3667 (2.2%)                    | 811 (2.5%)                     | 335 (2.3%)                       | 4813 (2.2%)                    |
| Hypertension              | 91477 (53.7%)                  | 16838 (51.5%)                  | 8208 (57%)                       | 116523 (53.6%)                 |
| Missing                   | 1326 (0.8%)                    | 381 (1.2%)                     | 125 (0.9%)                       | 1832 (0.8%)                    |
| Diabetes                  | 50194 (29.5%)                  | 10348 (31.7%)                  | 4772<br>(33.1%)                  | 65314 (30%)                    |

|                                                                | <b>HF alone<br/>(N=170297)</b> | <b>COPD + HF<br/>(N=32695)</b> | <b>Asthma + HF<br/>(N=14400)</b> | <b>Overall<br/>(N=217,392)</b> |
|----------------------------------------------------------------|--------------------------------|--------------------------------|----------------------------------|--------------------------------|
| Missing                                                        | 459 (0.3%)                     | 142 (0.4%)<br>54               | 54 (0.4%)                        | 655 (0.3%)                     |
| AF                                                             | 72235 (42.4%)                  | 13728 (42%)                    | 5508<br>(38.2%)                  | 91471 (42.1%)                  |
| <b>Breathlessness (NYHA class)</b>                             |                                |                                |                                  |                                |
| No limitation of physical activity                             | 12273 (7.2%)                   | 1254 (3.8%)                    | 768 (5.3%)                       | 14295 (6.6%)                   |
| Slight Limitation of ordinary physical activity                | 24541 (14.4%)                  | 3951 (12.1%)                   | 1993<br>(13.8%)                  | 30485 (14.%)                   |
| Marked Limitation of ordinary physical activity                | 68179 (40%)                    | 13671 (41.8%)                  | 6011<br>(41.7%)                  | 87861 (40.4%)                  |
| Symptoms at rest or minimal activity                           | 54652 (32.1%)                  | 12191 (37.3%)                  | 4809<br>(33.4%)                  | 71652 (33%)                    |
| Missing                                                        | 10652 (6.3%)                   | 1628 (5.0%)                    | 819 (5.7%)                       | 13099 (6.0%)                   |
| <b>Echocardiography performed</b>                              | 137955 (81%)                   | 26165 (80%)                    | 11342<br>(78.8%)                 | 175462 (80.7%)                 |
| <b>Ejection fraction status</b>                                |                                |                                |                                  |                                |
| HFrEF                                                          | 92619 (54.4%)                  | 16408 (50.2%)                  | 7334<br>(50.9%)                  | 116361 (53.5%)                 |
| HFpEF                                                          | 77678 (45.6%)                  | 16287 (49.8%)                  | 7066<br>(49.1%)                  | 101031 (46.5%)                 |
| <b>HF management plan</b>                                      |                                |                                |                                  |                                |
| Pre-discharge management plan is in place                      | 11760 (6.9%)                   | 2152 (6.6%)                    | 1002 (7.0%)                      | 14914 (6.9%)                   |
| Management plan has been discussed with the patient            | 10572 (6.2%)                   | 1894 (5.8%)                    | 954 (6.6%)                       | 13420 (6.2%)                   |
| Management plan has been communicated to the primary care team | 19880 (11.7%)                  | 3963 (12.1%)                   | 1780<br>(12.4%)                  | 25623 (11.8%)                  |
| All of the above                                               | 83507 (49%)                    | 15496 (47.4%)                  | 7140<br>(49.6%)                  | 106143 (48.8%)                 |
| No plan                                                        | 18021 (10.6%)                  | 3937 (12.0%)                   | 1546<br>(10.7%)                  | 23504 (10.8%)                  |
| Missing                                                        | 26557 (15.6%)                  | 5253 (16.1%)                   | 1978<br>(13.7%)                  | 33788 (15.5%)                  |
| <b>Referral to HF MDT</b>                                      | 53898 (31.6%)                  | 9719 (29.7%)                   | 4455<br>(30.9%)                  | 68072 (31.3%)                  |

|                                                                                                                                                                                                                                                                                                                                                                                                                                                                                                                                            | <b>HF alone<br/>(N=170297)</b> | <b>COPD + HF<br/>(N=32695)</b> | <b>Asthma + HF<br/>(N=14400)</b> | <b>Overall<br/>(N=217,392)</b> |
|--------------------------------------------------------------------------------------------------------------------------------------------------------------------------------------------------------------------------------------------------------------------------------------------------------------------------------------------------------------------------------------------------------------------------------------------------------------------------------------------------------------------------------------------|--------------------------------|--------------------------------|----------------------------------|--------------------------------|
| Missing                                                                                                                                                                                                                                                                                                                                                                                                                                                                                                                                    | 29946 (17.6%)                  | 5722 (17.5%)                   | 2216<br>(15.4%)                  | 37884 (17.4%)                  |
| <b>Referral to cardiology<br/>follow up</b>                                                                                                                                                                                                                                                                                                                                                                                                                                                                                                | 70925 (41.6%)                  | 11875 (36.3%)                  | 6241<br>(43.3%)                  | 89041 (41%)                    |
| Missing                                                                                                                                                                                                                                                                                                                                                                                                                                                                                                                                    | 13827 (8.1%)                   | 2882 (8.8%)                    | 984 (6.8%)                       | 17693 (8.1%)                   |
| <b>Referral to HF nurse<br/>follow-up</b>                                                                                                                                                                                                                                                                                                                                                                                                                                                                                                  | 76170 (44.7%)                  | 13728 (42.0%)                  | 6249<br>(43.4%)                  | 96147 (44.2%)                  |
| Missing                                                                                                                                                                                                                                                                                                                                                                                                                                                                                                                                    | 13442 (7.9%)                   | 2658 (8.1%)                    | 952 (6.6%)                       | 17052 (7.8%)                   |
| <b>LOS</b>                                                                                                                                                                                                                                                                                                                                                                                                                                                                                                                                 |                                |                                |                                  |                                |
| Median [IQR]                                                                                                                                                                                                                                                                                                                                                                                                                                                                                                                               | 8 [3, 15]                      | 8 [4, 16]                      | 7 [3, 14]                        | 8 [4, 15]                      |
| <b>IMD Wales (quartile)</b>                                                                                                                                                                                                                                                                                                                                                                                                                                                                                                                | <b>N=8205</b>                  | <b>N=1889</b>                  | <b>N=776</b>                     | <b>N= N=10870</b>              |
| 1 <sup>st</sup> (most deprived)                                                                                                                                                                                                                                                                                                                                                                                                                                                                                                            | 2126 (25.9%)                   | 371 (19.6%)                    | 188 (24.2%)                      | 2685 (24.7%)                   |
| 2 <sup>nd</sup>                                                                                                                                                                                                                                                                                                                                                                                                                                                                                                                            | 2058 (25.1%)                   | (21.0%)                        | (24.5%)                          | 2644 (24.3%)                   |
|                                                                                                                                                                                                                                                                                                                                                                                                                                                                                                                                            | 396                            | 190                            | 83                               |                                |
| 3 <sup>rd</sup>                                                                                                                                                                                                                                                                                                                                                                                                                                                                                                                            | 1977 (24.1%)                   | 459 (24.3%)                    | 196 (25.3%)                      | 2632 (24.2%)                   |
| 4 <sup>th</sup> (least deprived)                                                                                                                                                                                                                                                                                                                                                                                                                                                                                                           | 1824 (22.2%)                   | 607 (32.1%)                    | 185 (23.8%)                      | 2616 (24.1%)                   |
| Missing (not shown due to<br>small numbers)                                                                                                                                                                                                                                                                                                                                                                                                                                                                                                | -                              | -                              | -                                | -                              |
| <b>IMD England (quartile)</b>                                                                                                                                                                                                                                                                                                                                                                                                                                                                                                              | <b>N=159540</b>                | <b>N=30352</b>                 | <b>N=13433</b>                   | <b>N=203325</b>                |
| 1 <sup>st</sup> (most deprived)                                                                                                                                                                                                                                                                                                                                                                                                                                                                                                            | 35836 (22.5%)                  | 9338 (30.8%)                   | 3449<br>(25.7%)                  | 48623 (23.9%)                  |
| 2 <sup>nd</sup>                                                                                                                                                                                                                                                                                                                                                                                                                                                                                                                            | 38347 (24.0%)                  | 7762 (25.6%)                   | 3403<br>(25.3%)                  | 49512 (24.4%)                  |
| 3 <sup>rd</sup>                                                                                                                                                                                                                                                                                                                                                                                                                                                                                                                            | 40131 (25.2%)                  | 6848 (22.6%)                   | 3166<br>(23.6%)                  | 50145 (24.7%)                  |
| 4 <sup>th</sup> (least deprived)                                                                                                                                                                                                                                                                                                                                                                                                                                                                                                           | 41387 (25.9%)                  | 5615 (18.5%)                   | 3072<br>(22.9%)                  | 50074 (24.6%)                  |
| Missing                                                                                                                                                                                                                                                                                                                                                                                                                                                                                                                                    | 3839 (2.4%)                    | 789 (2.6%)                     | 343 (2.6%)                       | 4971 (2.4%)                    |
| <b>Abbreviations</b><br>AF= atrial fibrillation; COPD= chronic obstructive pulmonary disease; CRT-P= cardiac resynchronisation therapy pacemaker; CRT-D= cardiac resynchronisation therapy defibrillator, HF= heart failure; HF <sub>r</sub> EF= heart failure with reduced ejection fraction; HF <sub>p</sub> EF= heart failure with preserved ejection fraction; ICD= implantable cardioverter defibrillator; IMD= indices of multiple deprivation; LOS= length of stay; MDT= multi-disciplinary team; NYHA = New York Heart Association |                                |                                |                                  |                                |



**Table 2 – Association between COPD, asthma and outcomes in patients hospitalised for HF in England-Wales**

| Outcome                                                                                                                                                                                                                                                                                 | Fully adjusted <sup>a</sup> interaction model<br>COPD*EF<br>OR (95% CI) |                                                 | Fully adjusted <sup>b</sup> interaction model<br>Asthma*EF<br>OR (95% CI) |                               |
|-----------------------------------------------------------------------------------------------------------------------------------------------------------------------------------------------------------------------------------------------------------------------------------------|-------------------------------------------------------------------------|-------------------------------------------------|---------------------------------------------------------------------------|-------------------------------|
|                                                                                                                                                                                                                                                                                         | COPD * HFrEF                                                            | COPD* HFpEF                                     | Asthma * HFrEF                                                            | Asthma * HFpEF                |
| <b>In-hospital death</b><br>(N= 194,156 <sup>c</sup> )                                                                                                                                                                                                                                  | Interaction <i>P</i> -value = 0.01                                      |                                                 | Interaction <i>P</i> -value = 0.842                                       |                               |
| Fixed-effects                                                                                                                                                                                                                                                                           | 1.15 (1.09 – 1.21,<br>p=0.294*10 <sup>-10</sup> )                       | 1.05 (0.99 – 1.10,<br>p=0.081)                  | -                                                                         | -                             |
| <i>Random effects (hospitals, n=216)</i>                                                                                                                                                                                                                                                |                                                                         |                                                 |                                                                           |                               |
| <i>Variance</i>                                                                                                                                                                                                                                                                         | 0.201                                                                   |                                                 | -                                                                         |                               |
| <i>LR test P-value<sup>d</sup></i>                                                                                                                                                                                                                                                      | <i>P</i> =0.22*10 <sup>-16</sup>                                        |                                                 | -                                                                         | -                             |
| <b>Referral to cardiology follow-up</b><br>(N= 166,658 <sup>c</sup> )                                                                                                                                                                                                                   | Interaction <i>P</i> -value= 0.288*10 <sup>-7</sup>                     |                                                 | Interaction <i>P</i> -value=0.0001                                        |                               |
| Fixed effects                                                                                                                                                                                                                                                                           | 0.85 (0.81, 0.88,<br>p=0.2*10 <sup>-16</sup> )                          | 0.73 (0.70, 0.76,<br>p=0.2*10 <sup>-16</sup> )  | 1.08 (1.03-1.14,<br>p=0.2*10 <sup>-16</sup> )                             | 0.93 (0.88- 0.98,<br>p=0.003) |
| <i>Random effects (hospitals, n=216)</i>                                                                                                                                                                                                                                                |                                                                         |                                                 |                                                                           |                               |
| <i>Variance</i>                                                                                                                                                                                                                                                                         | 0.512                                                                   |                                                 | 0.512                                                                     |                               |
| <i>LR test p-value<sup>d</sup></i>                                                                                                                                                                                                                                                      | 0.22*10 <sup>-16</sup>                                                  |                                                 | <i>P</i> =0.22*10 <sup>-16</sup>                                          |                               |
| <b>Referral to HF MDT</b><br>(N=149,098 <sup>c</sup> )                                                                                                                                                                                                                                  | Interaction <i>P</i> -value = 0.017                                     |                                                 | Interaction <i>P</i> -value=0.095                                         |                               |
| Fixed effects                                                                                                                                                                                                                                                                           | 0.97 (0.93, 1.02,<br>p=0.263)                                           | 0.90 (0.86, 0.94,<br>p=0.265*10 <sup>-5</sup> ) | -                                                                         | -                             |
| <i>Random effects (hospitals, n=216)</i>                                                                                                                                                                                                                                                |                                                                         |                                                 |                                                                           |                               |
| <i>Variance</i>                                                                                                                                                                                                                                                                         | 2.139                                                                   |                                                 | -                                                                         |                               |
| <i>LR test p-value<sup>d</sup></i>                                                                                                                                                                                                                                                      | 0.22*10 <sup>-16</sup>                                                  |                                                 | -                                                                         | -                             |
| <b>Referral to HF nurse</b><br>(N= 166,723 <sup>c</sup> )                                                                                                                                                                                                                               | Interaction <i>P</i> -value = 0.249                                     |                                                 | Interaction <i>P</i> -value = 0.450                                       |                               |
| Abbreviations<br>COPD= chronic obstructive pulmonary disease; HF= heart failure; HFrEF= heart failure with reduced ejection fraction; HFpEF= heart failure with preserved ejection fraction; LR= likelihood ratio; MDT= multidisciplinary team; OR= odds ratio; CI= confidence interval |                                                                         |                                                 |                                                                           |                               |
| <sup>a</sup> Adjusted for age, sex, diabetes, hypertension, ischemic heart disease, atrial fibrillation, asthma, place of care and New York Heart Association status                                                                                                                    |                                                                         |                                                 |                                                                           |                               |

<sup>b</sup> Adjusted for age, sex, diabetes, hypertension, ischemic heart disease, atrial fibrillation, COPD, place of care and New York Heart Association status

<sup>c</sup> Excludes patients with missing data on covariates included in model

<sup>d</sup> Likelihood ratio test comparing fixed to random effects for hospital model fit, significant indicates random effects model performed better than fixed effects model

For peer review only

**Table 3. Association between COPD, asthma and HF medication prescription at discharge, in patients with HFrEF**

| Medication prescription at discharge                                                                                                                                                                                                                                                                                                                                                                                                                                                                                                                                                                                                              | COPD unadjusted OR (95%CI)                    | COPD fully adjusted <sup>a</sup> OR (95%CI)  | Asthma unadjusted OR (95%CI)                 | Asthma fully adjusted <sup>b</sup> OR (95%CI) |
|---------------------------------------------------------------------------------------------------------------------------------------------------------------------------------------------------------------------------------------------------------------------------------------------------------------------------------------------------------------------------------------------------------------------------------------------------------------------------------------------------------------------------------------------------------------------------------------------------------------------------------------------------|-----------------------------------------------|----------------------------------------------|----------------------------------------------|-----------------------------------------------|
| <b>Beta-blockers (N= 86449<sup>a,b</sup>)</b>                                                                                                                                                                                                                                                                                                                                                                                                                                                                                                                                                                                                     |                                               |                                              |                                              |                                               |
| Fixed effects                                                                                                                                                                                                                                                                                                                                                                                                                                                                                                                                                                                                                                     | 0.61 (0.58, 0.64, p=0.22*10 <sup>-16</sup> )  | 0.66 (0.64, 0.68, P=0.22*10 <sup>-16</sup> ) | 0.63 (0.59, 0.67, p=0.22*10 <sup>-16</sup> ) | 0.57 (0.54 0.60, p=0.22*10 <sup>-16</sup> )   |
| Random effects                                                                                                                                                                                                                                                                                                                                                                                                                                                                                                                                                                                                                                    |                                               |                                              |                                              |                                               |
| Variance                                                                                                                                                                                                                                                                                                                                                                                                                                                                                                                                                                                                                                          | 0.553                                         | 0.578                                        | 0.549                                        | 0.578                                         |
| LR test p-value                                                                                                                                                                                                                                                                                                                                                                                                                                                                                                                                                                                                                                   | 0.22*10 <sup>-16</sup>                        | 0.22*10 <sup>-16</sup>                       | 0.22*10 <sup>-16</sup>                       | 0.22*10 <sup>-16</sup>                        |
| <b>ACEis/ARBs (N=96080<sup>a,b</sup>)</b>                                                                                                                                                                                                                                                                                                                                                                                                                                                                                                                                                                                                         |                                               |                                              |                                              |                                               |
| Fixed effects                                                                                                                                                                                                                                                                                                                                                                                                                                                                                                                                                                                                                                     | 0.87 (0.84, 0.90, p=0.139*10 <sup>-13</sup> ) | 0.91 (0.87-0.95, p=0.256*10 <sup>-6</sup> )  | 1.13 (1.07, 1.19, p=0.16*10 <sup>-6</sup> )  | 1.07 (1.01, 1.13, p=0.0143)                   |
| Random effects                                                                                                                                                                                                                                                                                                                                                                                                                                                                                                                                                                                                                                    |                                               |                                              |                                              |                                               |
| Variance                                                                                                                                                                                                                                                                                                                                                                                                                                                                                                                                                                                                                                          | 0.149                                         | 0.130                                        | 0.148                                        | 0.130                                         |
| LR test p-value                                                                                                                                                                                                                                                                                                                                                                                                                                                                                                                                                                                                                                   | 0.22*10 <sup>-16</sup>                        | 0.22*10 <sup>-16</sup>                       | 0.22*10 <sup>-16</sup>                       | 0.22*10 <sup>-16</sup>                        |
| <b>MRA (N=96080<sup>a,b</sup>)</b>                                                                                                                                                                                                                                                                                                                                                                                                                                                                                                                                                                                                                |                                               |                                              |                                              |                                               |
| Fixed effects                                                                                                                                                                                                                                                                                                                                                                                                                                                                                                                                                                                                                                     | 0.97 (0.94, 1.01, p=0.114)                    | 1.02 (0.98, 1.06, p=0.268)                   | 1.08 (1.04, 1.13, p=0.00043)                 | 1.07 (1.02, 1.12, p=0.0084)                   |
| Random effects                                                                                                                                                                                                                                                                                                                                                                                                                                                                                                                                                                                                                                    |                                               |                                              |                                              |                                               |
| Variance                                                                                                                                                                                                                                                                                                                                                                                                                                                                                                                                                                                                                                          | 0.232                                         | 0.195                                        | 0.226                                        | 0.195                                         |
| LR test p-value                                                                                                                                                                                                                                                                                                                                                                                                                                                                                                                                                                                                                                   | 0.22*10 <sup>-16</sup>                        | 0.22*10 <sup>-16</sup>                       | 0.22*10 <sup>-16</sup>                       | 0.22*10 <sup>-16</sup>                        |
| Abbreviations<br>COPD= chronic obstructive pulmonary disease; OR= odd ratio; CI= confidence intervals; LR= likelihood ratio<br><sup>a</sup> Adjusted for age, sex, diabetes, hypertension, ischemic heart disease, atrial fibrillation, asthma, place of care and New York Heart Association status<br><sup>b</sup> Adjusted for age, sex, diabetes, hypertension, ischemic heart disease, atrial fibrillation, COPD, place of care and New York Heart Association status<br>Likelihood ratio test comparing fixed to random effects for hospital model fit, significant indicates random effects model performed better than fixed effects model |                                               |                                              |                                              |                                               |

## References

1. Lawson CA, Mamas MA, Jones PW, et al. Association of Medication Intensity and Stages of Airflow Limitation With the Risk of Hospitalization or Death in Patients With Heart Failure and Chronic Obstructive Pulmonary Disease. *JAMA Netw Open* 2018;1(8):e185489. doi: 10.1001/jamanetworkopen.2018.5489 [published Online First: 2019/01/16]
2. Gulea C, Zakeri R, Quint JK. Impact of chronic obstructive pulmonary disease on readmission after hospitalization for acute heart failure: A nationally representative US cohort study. *Int J Cardiol* 2019;290:113-18. doi: 10.1016/j.ijcard.2019.04.087 [published Online First: 2019/05/19]
3. Hawkins NM, Virani S, Ceconi C. Heart failure and chronic obstructive pulmonary disease: the challenges facing physicians and health services. *Eur Heart J* 2013;34(36):2795-803. doi: 10.1093/eurheartj/ehz192 [published Online First: 2013/07/09]
4. Pollevick ME, Xu KY, Mhango G, et al. The Relationship Between Asthma and Cardiovascular Disease: An Examination of the Framingham Offspring Study. *Chest* 2020 doi: 10.1016/j.chest.2020.11.053 [published Online First: 2020/12/15]
5. Iribarren C, Tolstykh IV, Miller MK, et al. Adult asthma and risk of coronary heart disease, cerebrovascular disease, and heart failure: a prospective study of 2 matched cohorts. *Am J Epidemiol* 2012;176(11):1014-24. doi: 10.1093/aje/kws181 [published Online First: 2012/11/10]
6. Buist AS. Similarities and differences between asthma and chronic obstructive pulmonary disease: treatment and early outcomes. *Eur Respir J Suppl* 2003;39:30s-35s. doi: 10.1183/09031936.03.00404903 [published Online First: 2003/02/08]
7. Salpeter SR, Ormiston TM, Salpeter EE. Cardiovascular effects of beta-agonists in patients with asthma and COPD: a meta-analysis. *Chest* 2004;125(6):2309-21. doi: 10.1378/chest.125.6.2309 [published Online First: 2004/06/11]
8. Pieske B, Tschöpe C, de Boer RA, et al. How to diagnose heart failure with preserved ejection fraction: the HFA-PEFF diagnostic algorithm: a consensus recommendation from the Heart Failure Association (HFA) of the European Society of Cardiology (ESC). *Eur Heart J* 2019;40(40):3297-317. doi: 10.1093/eurheartj/ehz641 [published Online First: 2019/09/11]
9. The heart failure dataset for the National Audit of Heart failure. <https://www.nicor.org.uk/national-cardiac-audit-programme/datasets/>, Accessed 26 April 2021.
10. Hawkins NM, Petrie MC, Jhund PS, et al. Heart failure and chronic obstructive pulmonary disease: diagnostic pitfalls and epidemiology. *Eur J Heart Fail* 2009;11(2):130-9. doi: 10.1093/eurjhf/hfn013 [published Online First: 2009/01/27]
11. Lainscak M, Anker SD. Heart failure, chronic obstructive pulmonary disease, and asthma: numbers, facts, and challenges. *ESC Heart Fail* 2015;2(3):103-07. doi: 10.1002/ehf2.12055 [published Online First: 2016/10/07]
12. Rabe KF, Hurst JR, Suissa S. Cardiovascular disease and COPD: dangerous liaisons? *Eur Respir Rev* 2018;27(149) doi: 10.1183/16000617.0057-2018 [published Online First: 2018/10/05]
13. Canepa M, Straburzynska-Migaj E, Drozd J, et al. Characteristics, treatments and 1-year prognosis of hospitalized and ambulatory heart failure patients with chronic obstructive pulmonary disease in the European Society of Cardiology Heart Failure Long-Term Registry. *Eur J Heart Fail* 2018;20(1):100-10. doi: 10.1002/ejhf.964 [published Online First: 2017/09/28]
14. Staszewsky L, Cortesi L, Tettamanti M, et al. Outcomes in patients hospitalized for heart failure and chronic obstructive pulmonary disease: differences in clinical profile and treatment between 2002 and 2009. *Eur J Heart Fail* 2016;18(7):840-8. doi: 10.1002/ejhf.519 [published Online First: 2016/04/22]
15. Gheorghide M, Sopko G, De Luca L, et al. Navigating the crossroads of coronary artery disease and heart failure. *Circulation* 2006;114(11):1202-13. doi: 10.1161/CIRCULATIONAHA.106.623199 [published Online First: 2006/09/13]
16. Iversen KK, Kjaergaard J, Akkan D, et al. Chronic obstructive pulmonary disease in patients admitted with heart failure. *J Intern Med* 2008;264(4):361-9. doi: 10.1111/j.1365-2796.2008.01975.x [published Online First: 2008/06/10]
17. Ather S, Chan W, Bozkurt B, et al. Impact of noncardiac comorbidities on morbidity and mortality in a predominantly male population with heart failure and preserved versus reduced ejection fraction. *J Am Coll Cardiol* 2012;59(11):998-1005. doi: 10.1016/j.jacc.2011.11.040 [published Online First: 2012/03/10]
18. Museedi AS, Alshami A, Douedi S, et al. Predictability of Inpatient Mortality of Different Comorbidities in Both Types of Acute Decompensated Heart Failure: Analysis of National Inpatient Sample. *Cardiol Res* 2021;12(1):29-36. doi: 10.14740/cr1186 [published Online First: 2021/01/16]
19. Camargo CA, Barr RG, Chen R, et al. Prospective study of inhaled corticosteroid use, cardiovascular mortality, and all-cause mortality in asthmatic women. *Chest* 2008;134(3):546-51. doi: 10.1378/chest.07-3126 [published Online First: 2008/07/22]
20. Suissa S, Assimes T, Brassard P, et al. Inhaled corticosteroid use in asthma and the prevention of myocardial infarction. *The American Journal of Medicine* 2003;115(5):377-81. doi: 10.1016/s0002-9343(03)00393-0
21. Hayhoe B, Kim D, Aylin PP, et al. Adherence to guidelines in management of symptoms suggestive of heart failure in primary care. *Heart* 2019;105(9):678-85. doi: 10.1136/heartjnl-2018-313971 [published Online First: 2018/12/06]

- 1  
2  
3 22. Gulea C, Zakeri R, Quint JK. Effect of beta-blocker therapy on clinical outcomes, safety, health-related quality of life and  
4 functional capacity in patients with chronic obstructive pulmonary disease (COPD): a protocol for a systematic  
5 literature review and meta-analysis with multiple treatment comparison. *BMJ Open* 2018;8(11):e024736. doi:  
6 10.1136/bmjopen-2018-024736 [published Online First: 2018/11/16]
- 7 23. Salpeter SR, Ormiston TM, Salpeter EE, et al. Cardioselective beta-blockers for chronic obstructive pulmonary disease: a  
8 meta-analysis. *Respiratory Medicine* 2003;97(10):1094-101. doi: 10.1016/s0954-6111(03)00168-9
- 9 24. Rothnie KJ, Liam Smeeth, Emily Herrett, Neil Pearce, Harry Hemingway, Jadwiga Wedzicha, Adam Timmis, and Jennifer K.  
10 Quint. Closing the mortality gap after a myocardial infarction in people with and without chronic obstructive  
11 pulmonary disease. *Heart* 2015;101(14):1103-10.
- 12 25. Shaw SM, Williams SG. Should beta-blockade continue to be withheld from patients with chronic heart failure and asthma?  
13 *European Heart Journal* 2009;30(10):1287-87. doi: 10.1093/eurheartj/ehp146
- 14 26. Gulea C, Zakeri R, Alderman V, et al. Beta-blocker therapy in patients with COPD: a systematic literature review and meta-  
15 analysis with multiple treatment comparison. *Respir Res* 2021;22(1):64. doi: 10.1186/s12931-021-01661-8 [published  
16 Online First: 2021/02/25]
- 17 27. Canepa M, Ameri P, Lainscak M. Chronic obstructive pulmonary disease and comorbidities in heart failure: the next frontier  
18 of sodium-glucose co-transporter 2 inhibitors? *Eur J Heart Fail* 2021 doi: 10.1002/ejhf.2109 [published Online First:  
19 2021/01/28]
- 20 28. Bloom CI, Nissen F, Douglas IJ, et al. Exacerbation risk and characterisation of the UK's asthma population from infants to  
21 old age. *Thorax* 2018;73(4):313-20. doi: 10.1136/thoraxjnl-2017-210650 [published Online First: 2017/10/28]
- 22 29. Ingebrigtsen TS, Marott JL, Vestbo J, et al. Coronary heart disease and heart failure in asthma, COPD and asthma-COPD  
23 overlap. *BMJ Open Respir Res* 2020;7(1) doi: 10.1136/bmjresp-2019-000470 [published Online First: 2020/12/30]
- 24  
25  
26  
27  
28  
29  
30  
31  
32  
33  
34  
35  
36  
37  
38  
39  
40  
41  
42  
43  
44  
45  
46  
47  
48  
49  
50  
51  
52  
53  
54  
55  
56  
57  
58  
59  
60

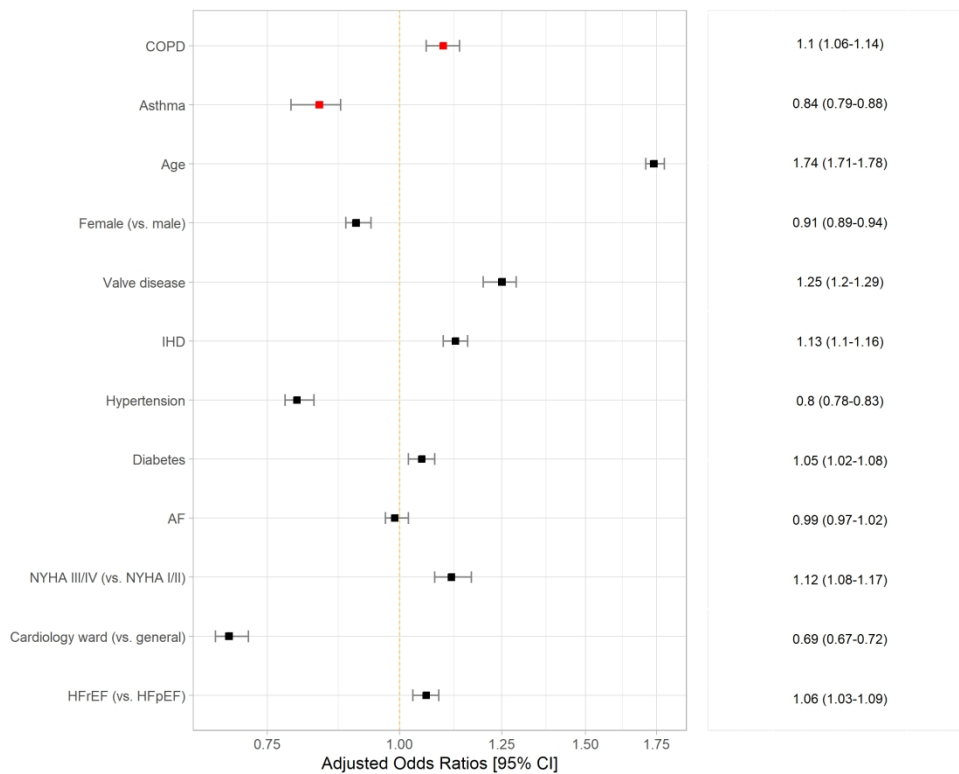

Figure 1 - Association between COPD, asthma and in-hospital death, adjusted for age, sex, valve disease; IHD, hypertension, diabetes, AF, NYHA, place of care and EF status; odds ratio with 95% confidence intervals.

581x452mm (118 x 118 DPI)

1  
2  
3  
4  
5  
6  
7  
8  
9  
10  
11  
12  
13  
14  
15  
16  
17  
18  
19  
20  
21  
22  
23  
24  
25  
26  
27  
28  
29  
30  
31  
32  
33  
34  
35  
36  
37  
38  
39  
40  
41  
42  
43  
44  
45  
46  
47  
48  
49  
50  
51  
52  
53  
54  
55  
56  
57  
58  
59  
60

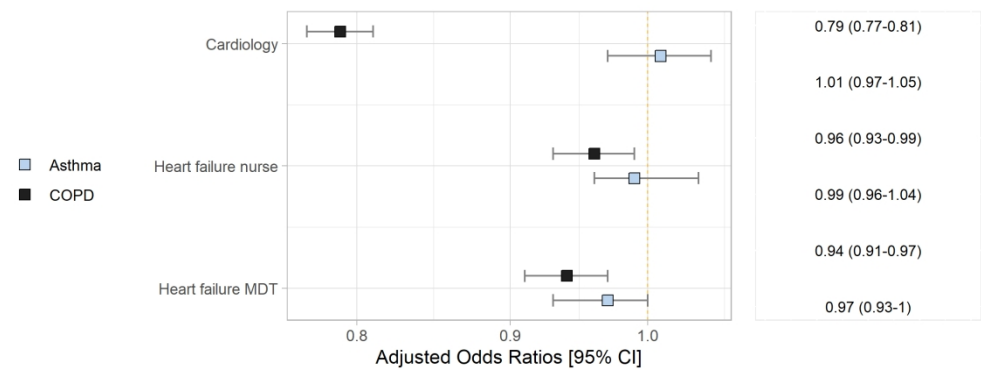

Figure 2. Association between COPD, asthma and referrals to HF services, adjusted for age, sex, valve disease; IHD, hypertension, diabetes, AF, NYHA, place of care and EF status.

516x193mm (118 x 118 DPI)

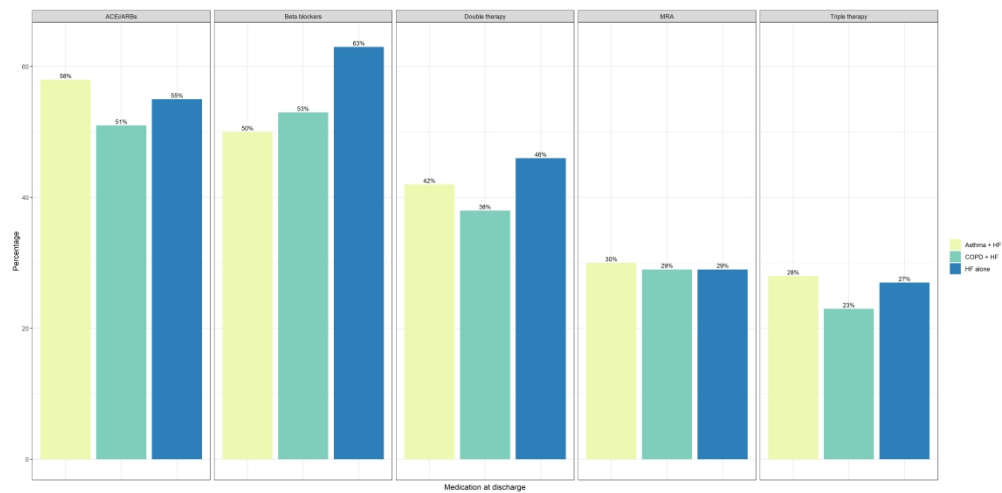

Figure 3. HF-medication prescription rates at discharge, according to comorbid respiratory disease status

1291x645mm (118 x 118 DPI)



## Supplemental Material

### Supplemental Methods

#### Data source

The NHFA was established in 2007 for hospitals in England-Wales to assess the quality of care and outcomes of hospitalised patients with a HF diagnosis in the first position at death or discharge, identified using ICD-10 codes (**Supplementary Table 1**). Admissions coded in the audit are compared to HF episodes in the Hospital Episode Statistics (HES) in England and the Patient Episode Database of Wales (PEDW) to determine the case ascertainment rate. The number of participating NHS trusts fluctuated from 145 in 2012–13 (97%) to 136 (82%) in 2017/2018. This corresponds to an increase from capturing 60% of national HF admissions in 2012, to 76% at the end of April 2018. Data are entered into the audit by hospital staff, using case ascertainment forms and data are categorised as mandatory (main indicators such as HF treatments, comorbidities, echocardiography) or non-mandatory (i.e., smoking status, pulmonary oedema, ethnicity). Since non-mandatory data elements are not expected to be included, there are considerable proportions of missing data across these variables (**Supplementary Table 2**). Some mandatory variables also have significant amounts of missing data (e.g., more than 70% missing data on BNP measurements, weight, height). The breadth of variables collected varied throughout the history of the audit, to reflect changes in HF guidelines and quality standards, which evolved over time. For example, haemoglobin and serum creatinine were collected routinely only after 2012<sup>1</sup>.

#### Statistical analysis

The analysis for the main outcome was implemented in a stepwise manner. First, an unconditional model including COPD was considered. In a second step we added asthma. Third, we added an interaction term between COPD and asthma, to assess whether both diagnoses had a significant contribution to the model. In lack of statistical significance these patients were not considered in further analyses. We then evaluated effect modification by EF status (HF<sub>r</sub>EF/HF<sub>p</sub>EF) by including separately an interaction term between COPD and EF, then asthma and EF.

#### *Handling of missing data*

#### **Sensitivity analysis – missing data imputation**

1  
2  
3 While the proportions of missing data (see above) were considerable, we deemed necessary to investigate further two important  
4 factors: “smoking status” and “Body Mass Index (BMI)”. In particular, we were interested in assessing whether COPD has an  
5 independent association with death in patients with HF, when controlling for smoking status, or whether the relationship is  
6 influenced by this factor.  
7  
8

9 We assumed data on smoking and BMI to be missing at random in our cohort, as the distribution in observed cases was similar to  
10 other UK cohorts of patients with HF<sup>23</sup>. We then used a multi-level approach<sup>4</sup> which takes into consideration the hierarchical data  
11 structure, clustered at hospital level. A Gibbs sampling procedure was used to generate 20 imputed data sets after a burn-in of 1000  
12 iterations.  
13  
14  
15  
16  
17  
18  
19  
20  
21  
22  
23  
24  
25  
26  
27  
28  
29  
30  
31  
32  
33  
34  
35  
36  
37  
38  
39  
40  
41  
42  
43  
44  
45  
46  
47

1  
2  
3  
4  
5  
6  
7  
8  
9  
10  
11  
12  
13  
14  
15  
16  
17  
18  
19  
20  
21  
22  
23  
24  
25  
26  
27  
28  
29  
30  
31  
32  
33  
34  
35  
36  
37  
38  
39  
40  
41  
42  
43  
44  
45  
46  
47

**Table 1.** Inclusion criteria for National Heart Failure Audit

| ICD-10 code                                                                           | Diagnosis                                                  |
|---------------------------------------------------------------------------------------|------------------------------------------------------------|
| I11.0                                                                                 | Hypertensive heart disease with (congestive) heart failure |
| I25.5                                                                                 | Ischaemic cardiomyopathy                                   |
| I42.0                                                                                 | Dilated cardiomyopathy                                     |
| I42.9                                                                                 | Cardiomyopathy, unspecified                                |
| I50.0                                                                                 | Congestive heart failure                                   |
| I50.1                                                                                 | Left ventricular failure                                   |
| I50.9                                                                                 | Heart failure, unspecified                                 |
| ICD= International Statistical Classification of Diseases and Related Health Problems |                                                            |

**Table 2.** Variables with considerable missingness in the National Heart Failure Audit 2012-2018

|                                       | <b>HF alone<br/>(N=170297)</b> | <b>COPD + HF<br/>(N=32695)</b> | <b>Asthma + HF<br/>(N=14400)</b> | <b>Overall<br/>(N=217392)</b> |
|---------------------------------------|--------------------------------|--------------------------------|----------------------------------|-------------------------------|
| <b>Cerebrovascular accident</b>       | 2882 (1.7%)                    | 582 (1.8%)                     | 244 (1.7%)                       | 3708 (1.7%)                   |
| Missing                               | 145636 (85.5%)                 | 28115 (86.0%)                  | 12279 (85.3%)                    | 186030 (85.6%)                |
| <b>Alcohol units/week</b>             |                                |                                |                                  |                               |
| Median [Q1, Q3]                       | 0 [0, 1.00]                    | 0 [0, 2.00]                    | 0 [0, 0]                         | 0 [0, 1.00]                   |
| Missing                               | 159233 (93.5%)                 | 30570 (93.5%)                  | 13314 (92.5%)                    | 203117 (93.4%)                |
| <b>Smoking status</b>                 |                                |                                |                                  |                               |
| Current smoker                        | 1869 (1.1%)                    | 911 (2.8%)                     | 143 (1.0%)                       | 2923 (1.3%)                   |
| Ex-smoker                             | 8371 (4.9%)                    | 2505 (7.7%)                    | 715 (5.0%)                       | 11591 (5.3%)                  |
| Never-smoker                          | 8823 (5.2%)                    | 673 (2.1%)                     | 896 (6.2%)                       | 10392 (4.8%)                  |
| Missing                               | 151234 (88.8%)                 | 28606 (87.5%)                  | 12646 (87.8%)                    | 192486 (88.5%)                |
| <b>Chest X-ray (pulmonary oedema)</b> | 3954 (2.3%)                    | 692 (2.1%)                     | 334 (2.3%)                       | 4980 (2.3%)                   |
| Missing                               | 157253 (92.3%)                 | 30528 (93.4%)                  | 13311 (92.4%)                    | 201092 (92.5%)                |
| <b>Medications at admission</b>       |                                |                                |                                  |                               |
| <b>ACEi</b>                           | 6316 (3.7%)                    | 1116 (3.4%)                    | 513 (3.6%)                       | 7945 (3.7%)                   |
| Contraindicated                       | 592 (0.3%)                     | 140 (0.4%)                     | 59 (0.4%)                        | 791 (0.4%)                    |
| Missing                               | 152642 (89.6%)                 | 29598 (90.5%)                  | 12903 (89.6%)                    | 195143 (89.8%)                |
| <b>ARB</b>                            | 2392 (1.4%)                    | 453 (1.4%)                     | 305 (2.1%)                       | 3150 (1.4%)                   |
| Not applicable                        | 2570 (1.5%)                    | 513 (1.6%)                     | 240 (1.7%)                       | 3323 (1.5%)                   |
| Stopped                               | 0 (0%)                         | 0 (0%)                         | 0 (0%)                           | 0 (0%)                        |
| Contraindicated                       | 338 (0.2%)                     | 88 (0.3%)                      | 32 (0.2%)                        | 458 (0.2%)                    |
| Missing                               | 151870 (89.2%)                 | 29463 (90.1%)                  | 12781 (88.8%)                    | 194114 (89.3%)                |
| <b>Beta-blocker</b>                   | 9516 (5.6%)                    | 1446 (4.4%)                    | 598 (4.2%)                       | 11560 (5.3%)                  |
| Not applicable                        | 762 (0.4%)                     | 144 (0.4%)                     | 88 (0.6%)                        | 994 (0.5%)                    |
| Contraindicated                       | 153 (0.1%)                     | 136 (0.4%)                     | 74 (0.5%)                        | 363 (0.2%)                    |
| Missing                               | 151820 (89.2%)                 | 29481 (90.2%)                  | 12831 (89.1%)                    | 194132 (89.3%)                |
| <b>Loop diuretic</b>                  | 5519 (3.2%)                    | 1202 (3.7%)                    | 490 (3.4%)                       | 7211 (3.3%)                   |

|                                        |                   |                   |                   |                   |
|----------------------------------------|-------------------|-------------------|-------------------|-------------------|
| Missing                                | 160255 (94.1%)    | 30820 (94.3%)     | 13532 (94.0%)     | 204607 (94.1%)    |
| <b>Thiazide or Metolazone</b>          | 925 (0.5%)        | 140 (0.4%)        | 81 (0.6%)         | 1146 (0.5%)       |
| Stopped*                               | -                 | -                 | -                 | -                 |
| Missing                                | 152559 (89.6%)    | 29604 (90.5%)     | 12891 (89.5%)     | 195054 (89.7%)    |
| <b>MRA</b>                             | 2356 (1.4%)       | 502 (1.5%)        | 221 (1.5%)        | 3079 (1.4%)       |
| Not applicable                         | 225 (0.1%)        | 45 (0.1%)         | 27 (0.2%)         | 297 (0.1%)        |
| Contraindicated                        | 36 (0.0%)         | *                 | *                 | 42 (0.0%)         |
| Missing                                | 152494 (89.5%)    | 29570 (90.4%)     | 12885 (89.5%)     | 194949 (89.7%)    |
| <b>Digoxin</b>                         | 1700 (1.0%)       | 399 (1.2%)        | 168 (1.2%)        | 2267 (1.0%)       |
| Missing                                | 152631 (89.6%)    | 29622 (90.6%)     | 12874 (89.4%)     | 195127 (89.8%)    |
| CCB                                    | 2847 (1.7%)       | 479 (1.5%)        | 280 (1.9%)        | 3606 (1.7%)       |
| Missing                                | 155279 (91.2%)    | 30261 (92.6%)     | 13150 (91.3%)     | 198690 (91.4%)    |
| <b>Bronchodilators</b>                 | 919 (0.5%)        | 1390 (4.3%)       | 750 (5.2%)        | 3059 (1.4%)       |
| Missing                                | 155316 (91.2%)    | 30248 (92.5%)     | 13136 (91.2%)     | 198700 (91.4%)    |
| <b>Ivabradine</b>                      | 186 (0.1%)        | 64 (0.2%)         | 31 (0.2%)         | 281 (0.1%)        |
| Missing                                | 153320 (90%)      | 29666 (90.7%)     | 12845 (89.2%)     | 195831 (90.1%)    |
| <b>BMI</b>                             |                   |                   |                   |                   |
| Median [Q1, Q3]                        | 26.5 [22.9, 31.1] | 27.1 [22.8, 32.2] | 28.0 [23.6, 33.7] | 26.7 [22.9, 31.4] |
| Missing                                | 125287 (73.6%)    | 23693 (72.5%)     | 10274 (71.3%)     | 159254 (73.3%)    |
| <b>BNP</b>                             |                   |                   |                   |                   |
| Median [Q1, Q3]                        | 428 [1.00, 1100]  | 350 [1.00, 985]   | 353 [1.00, 871]   | 412 [1.00, 1070]  |
| Missing                                | 153043 (89.9%)    | 29385 (89.9%)     | 12978 (90.1%)     | 195406 (89.9%)    |
| <b>NT_proBNP</b>                       |                   |                   |                   |                   |
| Median [Q1, Q3]                        | 2790 [404, 7530]  | 2490 [349, 6820]  | 2440 [426, 6330]  | 2700 [393, 7320]  |
| Missing                                | 153022 (89.9%)    | 29161 (89.2%)     | 12818 (89.0%)     | 195001 (89.7%)    |
| *not shown due to small numbers policy |                   |                   |                   |                   |

**Table 3.** Comorbidity definitions, according to NHFA dataset<sup>1</sup>, variables recorded from patient history

|                                 |                                                                                                                                                                                                                             |
|---------------------------------|-----------------------------------------------------------------------------------------------------------------------------------------------------------------------------------------------------------------------------|
| <b>COPD</b>                     | History of COPD - chronic bronchitis, emphysema or their cooccurrence. Must be indicated by pulmonary function testing evidence .ie FEV1<75% predicted value or use of beta agonist/steroid inhalers.                       |
| <b>Asthma</b>                   | History of childhood asthma and atopy, or asthma confirmed by respiratory physician for adult onset.                                                                                                                        |
| <b>Diabetes</b>                 | Diagnosis of diabetes prior to admission. This includes a confirmed diagnosis of diabetes and/or the use of an oral hypoglycaemic agent or insulin, and/or a fasting blood glucose >6.7, and/or a random blood glucose >11. |
| <b>Hypertension</b>             | Recorded Blood Pressure >140/90 on at least two occasions prior to admission, or already receiving treatment (drug, dietary or lifestyle) for hypertension                                                                  |
| <b>Ischemic heart disease</b>   | History of myocardial infarction, angina, ECG evidence of MI, CABG or angiogram documenting coronary artery disease.                                                                                                        |
| <b>Cerebrovascular accident</b> | A past neurological deficit of cerebrovascular cause, including episodes that persist beyond 24 hours and transient ischaemic attacks lasting less than 24 hours.                                                           |
| <b>Atrial fibrillation</b>      | An ECG was performed showing atrial fibrillation.                                                                                                                                                                           |
| <b>Valve disease</b>            | History of clinically diagnosed valve disease, moderate or severe stenosis or regurgitation on imaging, or an operative valve replacement/repair                                                                            |

<sup>1</sup> Available: <https://www.nicor.org.uk/national-cardiac-audit-programme/datasets/>

**Table 4.** Model building - association between COPD, asthma (including interaction with ejection fraction group) and in-hospital death in patients hospitalised for heart failure.

| Predictors                                              | Model 1                      | Model 2                        | Model 3                                | Model 4                              | Model 5a                         | Model 5b                             | Model 6                             |
|---------------------------------------------------------|------------------------------|--------------------------------|----------------------------------------|--------------------------------------|----------------------------------|--------------------------------------|-------------------------------------|
| <b>Fixed effects<br/>[coefficient<br/>estimate, SE]</b> |                              |                                |                                        |                                      |                                  |                                      |                                     |
| <b>COPD</b>                                             | 0.064<br>[0.017,<br>p<0.001] | 0.0706<br>[0.0174,<br>p<0.001] | 0.060<br>[0.018,<br>p<0.001]           | -0.0445<br>[0.0256,<br>p=0.081]      | 0.064 [0.017,<br>p<0.001]        | -0.029<br>[0.0242,<br>p=0.232]       | 0.0468 [0.026,<br>p=0.081]          |
| Asthma                                                  | -                            | -0.263<br>[0.0255,<br>p<0.001] | -0.287<br>[0.029,<br>p<0.001]          | -0.302 [0.040,<br>p<0.001]           | -0.2719<br>[0.034,<br>p<0.001]   | -0.266<br>[0.0255,<br>p<0.001]       | -0.179 [0.028,<br>p<0.001]          |
| COPD*Asthma                                             | -                            | -                              | <b>0.098<br/>[0.0573,<br/>p=0.087]</b> | 0.149 [0.076,<br>p=0.051]            | -                                | -                                    | -                                   |
| EF                                                      | -                            | -                              | -                                      | -0.208 [0.015,<br>p<0.001]           | -0.173 [0.014,<br>p<0.001]       | -0.207<br>[0.0149,<br>p<0.001]       | 0.0410 [0.017,<br>p<0.05]           |
| COPD *EF                                                | -                            | -                              | -                                      | <b>0.205 [0.036,<br/>p&lt;0.001]</b> | -                                | <b>0.195 [0.034,<br/>p&lt;0.001]</b> | <b>0.096 [0.037,<br/>p&lt;0.05]</b> |
| Asthma*EF                                               | -                            | -                              | -                                      | <b>0.018 [0.058,<br/>p=0.753]</b>    | <b>0.013 [0.05,<br/>p=0.797]</b> | -                                    | -                                   |
| COPD*Asthma*EF                                          | -                            | -                              | -                                      | <b>-0.093 [0.112,<br/>p=0.402]</b>   | -                                | -                                    | -                                   |
| Age                                                     | -                            | -                              | -                                      | -                                    | -                                | -                                    | 0.553 [0.0101,<br>p<0.001]          |

|                                                                                                                                                                                                                                                                                     |          |          |          |          |          |          |                           |
|-------------------------------------------------------------------------------------------------------------------------------------------------------------------------------------------------------------------------------------------------------------------------------------|----------|----------|----------|----------|----------|----------|---------------------------|
| Female (vs. male)                                                                                                                                                                                                                                                                   | -        | -        | -        | -        | -        | -        | -0.0922 [0.0150, p<0.001] |
| Valve disease                                                                                                                                                                                                                                                                       | -        | -        | -        | -        | -        | -        | 0.219 [0.0169, p<0.001]   |
| IHD                                                                                                                                                                                                                                                                                 | -        | -        | -        | -        | -        | -        | 0.1204 [0.015, p<0.001]   |
| Hypertension                                                                                                                                                                                                                                                                        | -        | -        | -        | -        | -        | -        | -0.220 [0.0148, p<0.001]  |
| Diabetes                                                                                                                                                                                                                                                                            | -        | -        | -        | -        | -        | -        | 0.0489 [0.0164, p<0.01]   |
| AF                                                                                                                                                                                                                                                                                  | -        | -        | -        | -        | -        | -        | -0.0056 [0.0147, p=0.703] |
| NYHA                                                                                                                                                                                                                                                                                | -        | -        | -        | -        | -        | -        | 0.116 [0.018, p<0.001]    |
| Place of care (cardiology vs not cardiology)                                                                                                                                                                                                                                        | -        | -        | -        | -        | -        | -        | -0.363 [0.0168, p<0.001]  |
| <b>Random effects (hospitals, n=219)</b>                                                                                                                                                                                                                                            |          |          |          |          |          |          |                           |
| Variance                                                                                                                                                                                                                                                                            | 0.205    | 0.208    | 0.208    | 0.201    | 0.201    | 0.201    | 0.159                     |
| SD                                                                                                                                                                                                                                                                                  | 0.453    | 0.456    | 0.456    | 0.448    | 0.449    | 0.449    | 0.399                     |
| AIC                                                                                                                                                                                                                                                                                 | 160533.4 | 158837.1 | 158836.2 | 158652.0 | 158681.2 | 158649.7 | 133038.5                  |
| Abbreviations<br>AIC= Akaike information criterion; AF= atrial fibrillation; COPD= chronic obstructive pulmonary disease; CI=confidence intervals; EF= ejection fraction; NYHA= New York Heart Association; IHD= ischemic heart disease; SD= standard deviation; SE= standard error |          |          |          |          |          |          |                           |

Results from a 2-level unconditional model that included COPD as fixed-effect and hospital as random effect suggested COPD was associated with an increase in the estimate for in-hospital mortality. The addition of asthma to this model indicated it had an inverse relationship with likelihood of death. A test for the interaction between COPD and asthma was not significant, thus, it was not considered in subsequent analyses. Further, we wanted to assess whether the effects of COPD, respectively asthma on in-hospital death are different with respect to EF status group therefore, we added a three-way interaction between COPD, asthma and EF to



1  
2  
3  
4  
5  
6  
7  
8  
9  
10  
11  
12  
13  
14  
15  
16  
17  
18  
19  
20  
21  
22  
23  
24  
25  
26  
27  
28  
29  
30  
31  
32  
33  
34  
35  
36  
37  
38  
39  
40  
41  
42  
43  
44  
45  
46  
47

the model. We detected a significant interaction between COPD and EF only, suggesting the effect of COPD only, not asthma would be differential according to the EF status. In the final model, we estimated the association between COPD and mortality in HFrEF and in HFpEF and adjusted for baseline covariates.

For peer review only

**Table 5.** Association between COPD, asthma and in-hospital death

| Predictors                                                                                                                                                           | COPD only (95% CI)        | COPD + asthma             | Fully adjusted model      | Model with COPD and EF interaction, fully adjusted OR (95% CI) |
|----------------------------------------------------------------------------------------------------------------------------------------------------------------------|---------------------------|---------------------------|---------------------------|----------------------------------------------------------------|
| <b>Fixed effects (95% CI)</b>                                                                                                                                        |                           |                           |                           | P-value for interaction =0.01                                  |
| COPD                                                                                                                                                                 | <b>1.07 (1.03 – 1.10)</b> | <b>1.07 (1.04-1.11)</b>   | <b>1.10 (1.06 – 1.14)</b> | 1.04 (0.99-1.10)                                               |
| Asthma                                                                                                                                                               | -                         | <b>0.77 (0.73 – 0.80)</b> | <b>0.84 (0.79, 0.88)</b>  | 0.83 (0.79-0.88)                                               |
| COPD (Yes vs. No): HFpEF                                                                                                                                             | -                         | -                         | -                         | <b>1.05 (0.99 – 1.10)</b>                                      |
| COPD (Yes vs. No): HFrEF                                                                                                                                             | -                         | -                         | -                         | <b>1.15 (1.09 – 1.21)</b>                                      |
| Age                                                                                                                                                                  | -                         |                           | 1.74 (1.71 -1.78)         | 1.74 (1.71-1.77)                                               |
| Female (vs. male)                                                                                                                                                    | -                         |                           | 0.91 (0.89-0.94)          | 0.91 (0.89-0.94)                                               |
| Valve disease                                                                                                                                                        | -                         |                           | 1.25 (1.20-1.29)          | 1.25 (1.20-1.29)                                               |
| IHD                                                                                                                                                                  | -                         |                           | 1.12 (1.10-1.16)          | 1.13 (1.10-1.16)                                               |
| Hypertension                                                                                                                                                         | -                         |                           | 0.8 (0.78-0.83)           | 0.80 (0.78-0.83)                                               |
| Diabetes                                                                                                                                                             | -                         |                           | 1.05 (1.02-1.08)          | 1.05 (1.02-1.08)                                               |
| AF                                                                                                                                                                   | -                         |                           | 0.99 (0.97-1.02)          | 0.99 (0.96-1.02)                                               |
| NYHA (III/IV vs. I/II)                                                                                                                                               | -                         |                           | 1.12 (1.08-1.17)          | 1.12 (1.08-1.17)                                               |
| Place of care (not cardiology vs. cardiology ward)                                                                                                                   | -                         |                           | 0.69 (0.67-0.72)          | 0.69 (0.67-0.71)                                               |
| <i>Random effects (Variance)</i>                                                                                                                                     |                           |                           |                           |                                                                |
| <i>LR test p-value</i>                                                                                                                                               | P<0.001                   | P<0.001                   | P<0.001                   | P<0.001                                                        |
| Likelihood ratio test comparing fixed to random effects for hospital model fit, significant indicates random effects model performed better than fixed effects model |                           |                           |                           |                                                                |
| Abbreviations                                                                                                                                                        |                           |                           |                           |                                                                |

1  
2  
3 AF= atrial fibrillation; COPD= chronic obstructive pulmonary disease; CI=confidence intervals; EF= ejection fraction; NYHA= New York Heart Association; IHD=  
4 ischemic heart disease; SD= standard deviation.  
5  
6  
7  
8  
9

10  
11  
12  
13  
14  
15  
16  
17  
18  
19  
20  
21  
22  
23  
24  
25  
26  
27  
28  
29  
30  
31  
32  
33  
34  
35  
36  
37  
38  
39  
40  
41  
42  
43  
44  
45  
46  
47

For peer review only

**Table 6.** Association between COPD and in-hospital mortality in patients hospitalised with heart failure. Results from 20 models using imputed smoking status and BMI (estimates combined using Rubin's rule).

|                                                                                                                                                                                                                                                             | Fully adjusted model, OR (95% CI) |
|-------------------------------------------------------------------------------------------------------------------------------------------------------------------------------------------------------------------------------------------------------------|-----------------------------------|
| <b>Fixed effects (95% CI)</b>                                                                                                                                                                                                                               |                                   |
| COPD                                                                                                                                                                                                                                                        | 1.12 (1.07 – 1.17)                |
| Asthma                                                                                                                                                                                                                                                      | 0.84 (0.80 – 0.90)                |
| Age                                                                                                                                                                                                                                                         | 1.67 (1.62 – 1.71)                |
| Female (vs. male)                                                                                                                                                                                                                                           | 0.89 (0.86 – 0.92)                |
| Valve disease                                                                                                                                                                                                                                               | 1.22 (1.18 – 1.26)                |
| IHD                                                                                                                                                                                                                                                         | 1.13 (1.10 – 1.17)                |
| Hypertension                                                                                                                                                                                                                                                | 0.82 (0.89 – 0.85)                |
| Diabetes                                                                                                                                                                                                                                                    | 1.12 (1.08 – 1.15)                |
| AF                                                                                                                                                                                                                                                          | 1.01 (0.98 – 1.04)                |
| NYHA (III/IV vs. I/II)                                                                                                                                                                                                                                      | 1.15 (1.10 – 1.20)                |
| Place of care (cardiology vs. no cardiology ward)                                                                                                                                                                                                           | 0.70 (0.69 – 0.73)                |
| EF                                                                                                                                                                                                                                                          | 1.03 (0.99 – 1.06)                |
| <i>Smoking status (ref: Current smoker)</i>                                                                                                                                                                                                                 |                                   |
| Ex-smoker                                                                                                                                                                                                                                                   | 0.90 (0.77 – 1.06)                |
| Never                                                                                                                                                                                                                                                       | 1 (0.84 – 1.19)                   |
| <i>BMI (ref: normal weight)</i>                                                                                                                                                                                                                             |                                   |
| Underweight                                                                                                                                                                                                                                                 | 1.31 (1.21 – 1.43)                |
| Overweight                                                                                                                                                                                                                                                  | 0.86 (0.81 – 0.91)                |
| Obese                                                                                                                                                                                                                                                       | 0.77 (0.73 – 0.81)                |
| <i>Random effects (Variance)</i>                                                                                                                                                                                                                            |                                   |
| <i>LR test p-value</i>                                                                                                                                                                                                                                      | P<0.001                           |
| Abbreviations<br>AF= atrial fibrillation; BMI= Body Mass index; CI= confidence intervals; COPD= chronic obstructive pulmonary disease; EF= ejection fraction; IHD= ischemic heart disease; NYHA= New York Heart Association; OR= Odds ratio; ref= reference |                                   |

**Table 7.** Association between COPD and in-hospital mortality in patients hospitalised with a confirmed diagnosis of HF.

|                                                                                                                                                                                                                                                             | <b>Fully adjusted model, OR (95% CI)</b> |
|-------------------------------------------------------------------------------------------------------------------------------------------------------------------------------------------------------------------------------------------------------------|------------------------------------------|
| <b>Fixed effects (95% CI)</b>                                                                                                                                                                                                                               |                                          |
| COPD                                                                                                                                                                                                                                                        | 1.11 (1.07 - 1.16)                       |
| Asthma                                                                                                                                                                                                                                                      | 0.84 (0.79 - 0.89)                       |
| Age                                                                                                                                                                                                                                                         | 1.04 (1.04 - 1.05)                       |
| Female (vs. male)                                                                                                                                                                                                                                           | 0.91 (0.88 - 0.94)                       |
| Valve disease                                                                                                                                                                                                                                               | 1.26 (1.22 - 1.30)                       |
| IHD                                                                                                                                                                                                                                                         | 1.15 (1.11 - 1.18)                       |
| Hypertension                                                                                                                                                                                                                                                | 0.81 (0.79 - 0.84)                       |
| Diabetes                                                                                                                                                                                                                                                    | 1.06 (1.03 - 1.10)                       |
| AF                                                                                                                                                                                                                                                          | 0.98 (0.95 - 1.01)                       |
| NYHA (III/IV vs. I/II)                                                                                                                                                                                                                                      | 1.13 (1.08 - 1.18)                       |
| Place of care (cardiology vs. no cardiology ward)                                                                                                                                                                                                           | 0.69 (0.66 - 0.71)                       |
| EF                                                                                                                                                                                                                                                          | 1.04 (1.01 - 1.08)                       |
| <i>Random effects (Variance)</i>                                                                                                                                                                                                                            | 0.166                                    |
| <i>LR test p-value</i>                                                                                                                                                                                                                                      | p<0.001                                  |
| Abbreviations<br>AF= atrial fibrillation; BMI= Body Mass index; CI= confidence intervals; COPD= chronic obstructive pulmonary disease; EF= ejection fraction; IHD= ischemic heart disease; NYHA= New York Heart Association; OR= Odds ratio; ref= reference |                                          |

**Figure 1.** Study flow

HF= heart failure; COPD=chronic obstructive pulmonary disease

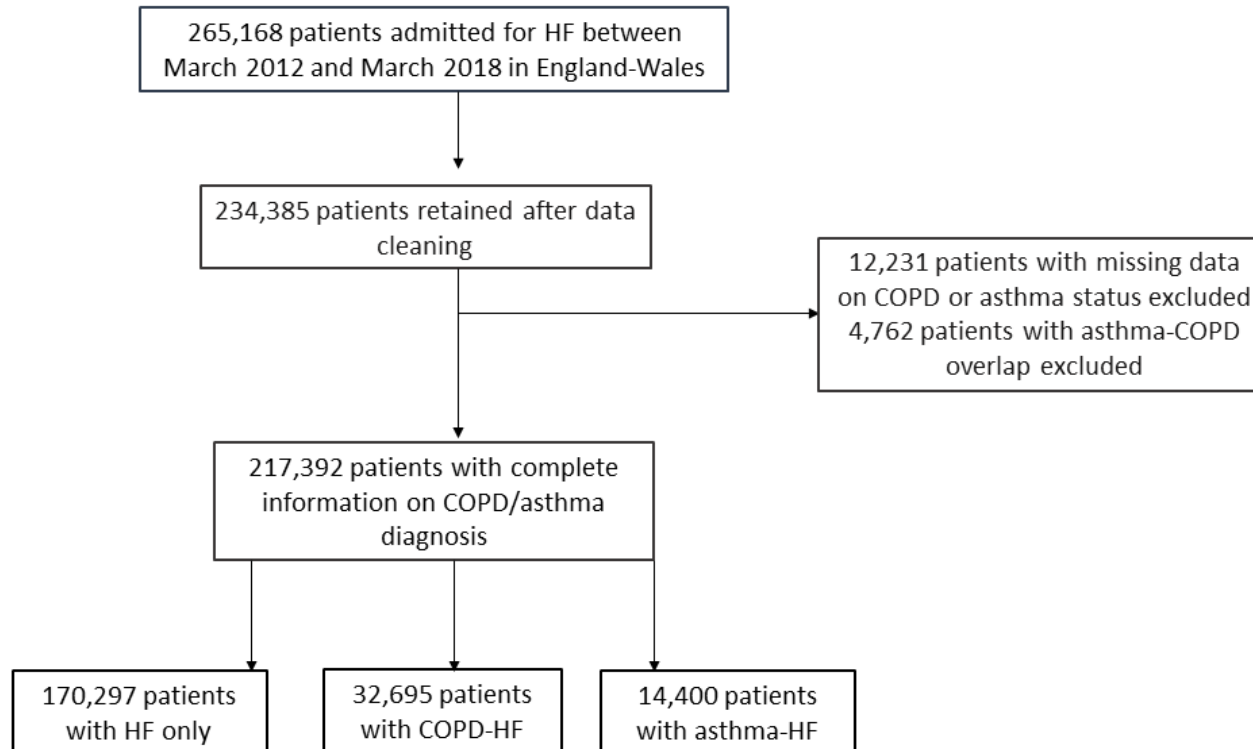

**Supplemental references**

1. Shoaib A, Mamas MA, Ahmad QS, et al. Characteristics and outcome of acute heart failure patients according to the severity of peripheral oedema. *Int J Cardiol* 2019;285:40-46. doi: 10.1016/j.ijcard.2019.03.020 [published Online First: 2019/03/25]
2. Conrad N, Judge A, Tran J, et al. Temporal trends and patterns in heart failure incidence: a population-based study of 4 million individuals. *The Lancet* 2018;391(10120):572-80. doi: 10.1016/s0140-6736(17)32520-5
3. Lawson CA, Mamas MA, Jones PW, et al. Association of Medication Intensity and Stages of Airflow Limitation With the Risk of Hospitalization or Death in Patients With Heart Failure and Chronic Obstructive Pulmonary Disease. *JAMA Netw Open* 2018;1(8):e185489. doi: 10.1001/jamanetworkopen.2018.5489 [published Online First: 2019/01/16]
4. Quartagno M, Simon Grund, and James Carpenter. Jomo: a flexible package for two-level joint modelling multiple imputation. . *R Journal* 2019;9.1

**STROBE 2007 (v4) checklist of items to be included in reports of observational studies in epidemiology\***  
**Checklist for cohort, case-control, and cross-sectional studies (combined)**

| Section/Topic             | Item # | Recommendation                                                                                                                                                                                                                                                                                                                                                                                                                                                         | Reported on page #  |
|---------------------------|--------|------------------------------------------------------------------------------------------------------------------------------------------------------------------------------------------------------------------------------------------------------------------------------------------------------------------------------------------------------------------------------------------------------------------------------------------------------------------------|---------------------|
| Title and abstract        | 1      | (a) Indicate the study's design with a commonly used term in the title or the abstract                                                                                                                                                                                                                                                                                                                                                                                 | 3                   |
|                           |        | (b) Provide in the abstract an informative and balanced summary of what was done and what was found                                                                                                                                                                                                                                                                                                                                                                    | 2,3                 |
| <b>Introduction</b>       |        |                                                                                                                                                                                                                                                                                                                                                                                                                                                                        |                     |
| Background/rationale      | 2      | Explain the scientific background and rationale for the investigation being reported                                                                                                                                                                                                                                                                                                                                                                                   | 5,6                 |
| Objectives                | 3      | State specific objectives, including any pre-specified hypotheses                                                                                                                                                                                                                                                                                                                                                                                                      | 5,6                 |
| <b>Methods</b>            |        |                                                                                                                                                                                                                                                                                                                                                                                                                                                                        |                     |
| Study design              | 4      | Present key elements of study design early in the paper                                                                                                                                                                                                                                                                                                                                                                                                                | 6                   |
| Setting                   | 5      | Describe the setting, locations, and relevant dates, including periods of recruitment, exposure, follow-up, and data collection                                                                                                                                                                                                                                                                                                                                        | 6, 7, Supplement    |
| Participants              | 6      | (a) <i>Cohort study</i> —Give the eligibility criteria, and the sources and methods of selection of participants. Describe methods of follow-up<br><i>Case-control study</i> —Give the eligibility criteria, and the sources and methods of case ascertainment and control selection. Give the rationale for the choice of cases and controls<br><i>Cross-sectional study</i> —Give the eligibility criteria, and the sources and methods of selection of participants | 6, 7, Supplement    |
|                           |        | (b) <i>Cohort study</i> —For matched studies, give matching criteria and number of exposed and unexposed<br><i>Case-control study</i> —For matched studies, give matching criteria and the number of controls per case                                                                                                                                                                                                                                                 |                     |
| Variables                 | 7      | Clearly define all outcomes, exposures, predictors, potential confounders, and effect modifiers. Give diagnostic criteria, if applicable                                                                                                                                                                                                                                                                                                                               | 7, 8, Supplement    |
| Data sources/ measurement | 8*     | For each variable of interest, give sources of data and details of methods of assessment (measurement). Describe comparability of assessment methods if there is more than one group                                                                                                                                                                                                                                                                                   | 6, 7, Supplement    |
| Bias                      | 9      | Describe any efforts to address potential sources of bias                                                                                                                                                                                                                                                                                                                                                                                                              | 7, 8, 9, Supplement |
| Study size                | 10     | Explain how the study size was arrived at                                                                                                                                                                                                                                                                                                                                                                                                                              |                     |
| Quantitative variables    | 11     | Explain how quantitative variables were handled in the analyses. If applicable, describe which groupings were chosen and why                                                                                                                                                                                                                                                                                                                                           | 8, 9                |
| Statistical methods       | 12     | (a) Describe all statistical methods, including those used to control for confounding                                                                                                                                                                                                                                                                                                                                                                                  | 8,9, Supplement     |
|                           |        | (b) Describe any methods used to examine subgroups and interactions                                                                                                                                                                                                                                                                                                                                                                                                    | 8,9, Supplement     |
|                           |        | (c) Explain how missing data were addressed                                                                                                                                                                                                                                                                                                                                                                                                                            | 9, Supplement       |
|                           |        | (d) <i>Cohort study</i> —If applicable, explain how loss to follow-up was addressed<br><i>Case-control study</i> —If applicable, explain how matching of cases and controls was addressed                                                                                                                                                                                                                                                                              | 6                   |



|                          |     |                                                                                                                                                                                                              |                          |
|--------------------------|-----|--------------------------------------------------------------------------------------------------------------------------------------------------------------------------------------------------------------|--------------------------|
|                          |     | <i>Cross-sectional study</i> —If applicable, describe analytical methods taking account of sampling strategy                                                                                                 |                          |
|                          |     | (e) Describe any sensitivity analyses                                                                                                                                                                        | 9, Supplement            |
| <b>Results</b>           |     |                                                                                                                                                                                                              |                          |
| Participants             | 13* | (a) Report numbers of individuals at each stage of study—eg numbers potentially eligible, examined for eligibility, confirmed eligible, included in the study, completing follow-up, and analysed            | 6, Supplement flow chart |
|                          |     | (b) Give reasons for non-participation at each stage                                                                                                                                                         | Supplement flow chart    |
|                          |     | (c) Consider use of a flow diagram                                                                                                                                                                           | Supplement flow chart    |
| Descriptive data         | 14* | (a) Give characteristics of study participants (eg demographic, clinical, social) and information on exposures and potential confounders                                                                     | 9, 10                    |
|                          |     | (b) Indicate number of participants with missing data for each variable of interest                                                                                                                          | 20-22, Supplement        |
|                          |     | (c) <i>Cohort study</i> —Summarise follow-up time (eg, average and total amount)                                                                                                                             |                          |
| Outcome data             | 15* | <i>Cohort study</i> —Report numbers of outcome events or summary measures over time                                                                                                                          |                          |
|                          |     | <i>Case-control study</i> —Report numbers in each exposure category, or summary measures of exposure                                                                                                         |                          |
|                          |     | <i>Cross-sectional study</i> —Report numbers of outcome events or summary measures                                                                                                                           | 10-12                    |
| Main results             | 16  | (a) Give unadjusted estimates and, if applicable, confounder-adjusted estimates and their precision (eg, 95% confidence interval). Make clear which confounders were adjusted for and why they were included | 23, Supplement           |
|                          |     | (b) Report category boundaries when continuous variables were categorized                                                                                                                                    | 9, 20-22                 |
|                          |     | (c) If relevant, consider translating estimates of relative risk into absolute risk for a meaningful time period                                                                                             |                          |
| Other analyses           | 17  | Report other analyses done—eg analyses of subgroups and interactions, and sensitivity analyses                                                                                                               | 10, Supplement           |
| <b>Discussion</b>        |     |                                                                                                                                                                                                              |                          |
| Key results              | 18  | Summarise key results with reference to study objectives                                                                                                                                                     | 12-16                    |
| Limitations              | 19  | Discuss limitations of the study, taking into account sources of potential bias or imprecision. Discuss both direction and magnitude of any potential bias                                                   | 17                       |
| Interpretation           | 20  | Give a cautious overall interpretation of results considering objectives, limitations, multiplicity of analyses, results from similar studies, and other relevant evidence                                   | 18                       |
| Generalisability         | 21  | Discuss the generalisability (external validity) of the study results                                                                                                                                        | 18                       |
| <b>Other information</b> |     |                                                                                                                                                                                                              |                          |
| Funding                  | 22  | Give the source of funding and the role of the funders for the present study and, if applicable, for the original study on which the present article is based                                                | 19                       |

\*Give information separately for cases and controls in case-control studies and, if applicable, for exposed and unexposed groups in cohort and cross-sectional studies.

1  
2 **Note:** An Explanation and Elaboration article discusses each checklist item and gives methodological background and published examples of transparent reporting. The STROBE  
3 checklist is best used in conjunction with this article (freely available on the Web sites of PLoS Medicine at <http://www.plosmedicine.org/>, Annals of Internal Medicine at  
4 <http://www.annals.org/>, and Epidemiology at <http://www.epidem.com/>). Information on the STROBE Initiative is available at [www.strobe-statement.org](http://www.strobe-statement.org).  
5  
6  
7  
8  
9  
10  
11  
12  
13  
14  
15  
16  
17  
18  
19  
20  
21  
22  
23  
24  
25  
26  
27  
28  
29  
30  
31  
32  
33  
34  
35  
36  
37  
38  
39  
40  
41  
42  
43  
44  
45  
46

For peer review only

# BMJ Open

## Impact of COPD and asthma on in-hospital mortality and management of patients with heart failure in England and Wales: an observational analysis

|                                 |                                                                                                                                                                                                                                                                                                                                                                          |
|---------------------------------|--------------------------------------------------------------------------------------------------------------------------------------------------------------------------------------------------------------------------------------------------------------------------------------------------------------------------------------------------------------------------|
| Journal:                        | <i>BMJ Open</i>                                                                                                                                                                                                                                                                                                                                                          |
| Manuscript ID                   | bmjopen-2021-059122.R1                                                                                                                                                                                                                                                                                                                                                   |
| Article Type:                   | Original research                                                                                                                                                                                                                                                                                                                                                        |
| Date Submitted by the Author:   | 17-Mar-2022                                                                                                                                                                                                                                                                                                                                                              |
| Complete List of Authors:       | Gulea, Claudia; Imperial College London; NIHR Imperial Biomedical Research Centre<br>Zakeri, Rosita; King's College London<br>Kallis, Constantinos; Imperial College London; NIHR Imperial Biomedical Research Centre<br>Quint, Jennifer; Imperial College London, Respiratory Epidemiology, Occupational Medicine and Public Health; National Heart and Lung Institute; |
| <b>Primary Subject Heading</b>: | Cardiovascular medicine                                                                                                                                                                                                                                                                                                                                                  |
| Secondary Subject Heading:      | Epidemiology, Respiratory medicine                                                                                                                                                                                                                                                                                                                                       |
| Keywords:                       | Heart failure < CARDIOLOGY, EPIDEMIOLOGY, RESPIRATORY MEDICINE (see Thoracic Medicine)                                                                                                                                                                                                                                                                                   |
|                                 |                                                                                                                                                                                                                                                                                                                                                                          |

SCHOLARONE™  
Manuscripts



I, the Submitting Author has the right to grant and does grant on behalf of all authors of the Work (as defined in the below author licence), an exclusive licence and/or a non-exclusive licence for contributions from authors who are: i) UK Crown employees; ii) where BMJ has agreed a CC-BY licence shall apply, and/or iii) in accordance with the terms applicable for US Federal Government officers or employees acting as part of their official duties; on a worldwide, perpetual, irrevocable, royalty-free basis to BMJ Publishing Group Ltd ("BMJ") its licensees and where the relevant Journal is co-owned by BMJ to the co-owners of the Journal, to publish the Work in this journal and any other BMJ products and to exploit all rights, as set out in our [licence](#).

The Submitting Author accepts and understands that any supply made under these terms is made by BMJ to the Submitting Author unless you are acting as an employee on behalf of your employer or a postgraduate student of an affiliated institution which is paying any applicable article publishing charge ("APC") for Open Access articles. Where the Submitting Author wishes to make the Work available on an Open Access basis (and intends to pay the relevant APC), the terms of reuse of such Open Access shall be governed by a Creative Commons licence – details of these licences and which [Creative Commons](#) licence will apply to this Work are set out in our licence referred to above.

Other than as permitted in any relevant BMJ Author's Self Archiving Policies, I confirm this Work has not been accepted for publication elsewhere, is not being considered for publication elsewhere and does not duplicate material already published. I confirm all authors consent to publication of this Work and authorise the granting of this licence.

1  
2  
3 **Title:** Impact of COPD and asthma on in-hospital mortality and management of patients with  
4 heart failure in England and Wales: an observational analysis  
5  
6  
7

8 **Authors:** Claudia Gulea<sup>1, 2</sup>, Rosita Zakeri<sup>3</sup>, Constantinos Kallis<sup>1, 2</sup>, Jennifer K. Quint<sup>1, 2</sup>  
9  
10  
11  
12  
13

#### 14 **Affiliations**

15  
16  
17 <sup>1</sup> National Heart and Lung Institute, Imperial College London, UK  
18  
19

20 <sup>2</sup> NIHR Imperial Biomedical Research Centre  
21  
22

23 <sup>3</sup> British Heart Foundation Centre for Research Excellence, King's College London, UK  
24  
25  
26  
27

28 **Corresponding author:** Claudia Gulea  
29  
30

31 Email address: [c.gulea18@imperial.ac.uk](mailto:c.gulea18@imperial.ac.uk)  
32  
33

34 Address: G05, Emmanuel Kaye Building, 1B Manresa Road, National  
35 Heart and Lung Institute, Imperial College London, United Kingdom  
36  
37

38 Telephone: +44 (0) 20 7594 7987  
39  
40  
41  
42  
43  
44  
45  
46  
47

48 **Word count:** 3,193  
49  
50  
51  
52  
53  
54  
55  
56  
57

## Abstract

**Objective:** To evaluate the association between having concomitant COPD or asthma, and in-patient mortality and post-discharge management among patients hospitalised for acute HF.

**Setting:** Data were obtained from patients enrolled in the National Heart Failure Audit.

**Participants:** 217,329 patients hospitalised for HF in England-Wales between March 2012 and 2018.

**Outcomes:** In-hospital mortality, referrals to cardiology follow-up and prescriptions for HF medications were compared between patients with comorbid COPD (COPD-HF) or asthma (asthma-HF) versus HF-alone using mixed-effects logistic regression.

**Results:** Patients with COPD-HF were more likely to die during hospitalisation, and those with asthma-HF had a reduced likelihood of death, compared with patients who had HF-alone ([adjusted]OR<sub>adj</sub>, 95% CI: 1.10, 1.06-1.14 and OR<sub>adj</sub>, 95%CI: 0.85, 0.79-0.88). In patients who survived to discharge, referral to HF follow-up services differed between groups: COPD-HF patients had reduced odds of cardiology follow-up (OR<sub>adj</sub>, 95%CI 0.79, 0.77-0.81), whilst cardiology referral odds for asthma-HF were similar to HF-alone. Overall, proportions of HF medication prescriptions at discharge were low for both COPD-HF and asthma-HF groups, particularly prescriptions for beta-blockers.

**Conclusions:** In this nationwide analysis, we showed that COPD and asthma significantly impact the clinical course in patients hospitalised for HF. COPD is associated with higher in-patient mortality and lower cardiology referral odds, whilst COPD and asthma are both associated with lower use of prognostic HF therapies on discharge. These data highlight therapeutic gaps and a

1  
2  
3 need for better integration of cardiopulmonary services to improve healthcare provision for  
4  
5 patients with HF and coexisting respiratory disease.  
6  
7

8  
9 **Keywords:** heart failure, chronic obstructive pulmonary disease, asthma  
10  
11  
12  
13  
14  
15  
16  
17  
18  
19  
20  
21  
22  
23  
24  
25  
26  
27  
28  
29  
30  
31  
32  
33  
34  
35  
36  
37  
38  
39  
40  
41  
42  
43  
44  
45  
46  
47  
48  
49  
50  
51  
52  
53  
54  
55  
56  
57  
58  
59  
60

For peer review only

### Strengths and limitations

- This study evaluates the association between respiratory disease and in-hospital mortality and management outcomes in patients hospitalized with HF in a representative population from England and Wales.
- HF diagnosis was based either on diagnostic tests or clinical investigations which limited misclassification bias
- HF with preserved ejection fraction was an exclusion diagnosis (i.e., defined as HF in patients who did not have reduced ejection fraction) due to lack of information regarding specific diagnostic tests to confirm preserved ejection fraction status.
- There was a large proportion of missing data regarding bronchodilators and inhaled corticosteroids prescriptions which prevented evaluation of their impact on outcomes.



## Introduction

COPD and asthma frequently coexist with HF and are independently associated with mortality and increased healthcare use<sup>1,2</sup>. This has been explained by shared systemic inflammation, worsened by the presence of pulmonary disease as well as sub-optimal HF management<sup>3</sup>.

Evidence suggests that patients with HF and comorbid COPD are less likely to receive guideline recommended treatment for their HF. For example, beta-blockers which are used in the management of HF with reduced ejection fraction (HFrEF) are often not prescribed to patients with COPD, due to fear of bronchoconstriction<sup>4</sup>, reduced effectiveness of emergency beta-agonist medication or difficulty in discriminating between COPD and asthma<sup>5</sup>.

Less data exist on the relationship between asthma and HF. Some studies have shown that asthma is associated with an increased occurrence of cardiovascular disease whilst others suggest this is limited to women or smokers<sup>6</sup> and depends on age of asthma-onset<sup>7</sup>. This is further complicated by a component of chronic irreversible airflow obstruction in some people with long standing asthma, associated with a reduced response to asthma therapy<sup>8</sup>. This may, in turn, affect treatment choices in this group of patients and increase vulnerability to adverse events, versus either disease occurring alone. The use of beta-agonists or inhaled corticosteroids in both COPD and asthma has been associated with HF-onset, HF-related hospitalisation and increase in cardiovascular events<sup>9</sup>, which depend on disease severity and study setting, but nevertheless worsen prognosis<sup>1,7</sup>.

Our main aim was to compare in-hospital mortality and post-discharge HF management (referrals to HF services, discharge medication) among patients admitted to hospital with decompensated HF, with and without COPD or asthma in a sample of patients from the

1  
2  
3 National Heart Failure Audit (NHFA) from England and Wales. We also investigated whether  
4  
5  
6  
7  
8  
9  
10  
11  
12  
13  
14  
15  
16  
17  
18  
19  
20  
21  
22  
23  
24  
25  
26  
27  
28  
29  
30  
31  
32  
33  
34  
35  
36  
37  
38  
39  
40  
41  
42  
43  
44  
45  
46  
47  
48  
49  
50  
51  
52  
53  
54  
55  
56  
57  
58  
59  
60  
ejection fraction (EF) status affects outcomes in these patient groups.

## 8 **Methods**

11 We included patients older than 18 years of age admitted to hospital for HF between March  
12  
13  
14  
15  
16  
17  
18  
19  
20  
21  
22  
23  
24  
25  
26  
27  
28  
29  
30  
31  
32  
33  
34  
35  
36  
37  
38  
39  
40  
41  
42  
43  
44  
45  
46  
47  
48  
49  
50  
51  
52  
53  
54  
55  
56  
57  
58  
59  
60  
We included patients older than 18 years of age admitted to hospital for HF between March  
2012 to April 2018 whose data were submitted to the NHFA. We considered their first HF  
hospitalisation only (**Supplemental Methods, Supplemental Table 1**).

## 18 **Exposures**

21  
22  
23  
24  
25  
26  
27  
28  
29  
30  
31  
32  
33  
34  
35  
36  
37  
38  
39  
40  
41  
42  
43  
44  
45  
46  
47  
48  
49  
50  
51  
52  
53  
54  
55  
56  
57  
58  
59  
60  
**COPD** was defined as having a history of COPD - chronic bronchitis and/or emphysema,  
confirmed by spirometry or beta agonist/steroid inhaler use.

**Asthma** was defined as having a history of childhood asthma and atopy or having an asthma  
diagnosis confirmed by a respiratory physician.

No diagnostic test results were provided for COPD or asthma (**Supplemental Table 2**), and for  
the purposes of this work were based on being recorded as “yes” (present) or “no” (absent) in  
the audit data as defined above.

**EF status** was defined as HFrEF and HF with preserved EF (HFpEF), determined through  
echocardiography, MRI, nuclear scan, or angiogram. Those with an EF <40% were categorised  
HFrEF. Due to a lack of information regarding specific diagnostic tests required to make a HFpEF  
diagnosis, we determined HFpEF as patients not categorised as HFrEF<sup>10</sup>.

**Covariates** were age, sex, New York Heart Association [NYHA] classification and place of care  
(cardiology ward vs. other place of care [i.e., general ward]) and comorbidities (atrial fibrillation

1  
2  
3 [AF], ischemic heart disease [IHD], diabetes, valve disease, hypertension [**Supplementary Table**  
4  
5  
6 **2**]).

## 8 9 **Outcomes**

10  
11 Our primary outcome was in-hospital death during the index event (HF admission), defined as a  
12  
13 dichotomised variable (died/alive at discharge), according to COPD or asthma status. Secondary  
14  
15 analyses included post-discharge referral to HF services (cardiology, HF nurse, HF MDT  
16  
17 [multidisciplinary team]) and prescriptions for HF medications at discharge in those with HFrEF.  
18  
19

## 20 21 22 **Statistical analysis**

23  
24 Differences in baseline characteristics between patients with COPD-HF/Asthma-HF and HF  
25  
26 alone are presented using percentages for categorical variables and medians and interquartile  
27  
28 ranges [IQR] for continuous variables. We assessed differences between groups using chi-  
29  
30 square and Kruskal-Wallis tests. We assessed differences in outcomes between patients with  
31  
32 COPD-HF compared with HF alone and between asthma-HF compared with HF-alone using  
33  
34 multilevel logistic regression with a random effect for hospital, to calculate odds ratios (OR) and  
35  
36 95% confidence intervals (CI) (**Supplemental Methods**). In the main analysis, we adjusted for  
37  
38 confounders with less than 20% missing data: age, sex, comorbidities, place of care and NYHA  
39  
40 status. The model building process is presented in **Supplementary Table 3**. Analyses of referrals  
41  
42 were conducted similarly and excluded patients who died in-hospital. Associations between  
43  
44 COPD or asthma and HF medication prescriptions at discharge (beta blockers, angiotensin-  
45  
46 converting-enzyme inhibitors [ACEis], angiotensin receptor blockers [ARBs] and  
47  
48 mineralocorticoid receptor antagonists [MRAs]) excluded those with HFpEF.  
49  
50  
51  
52  
53  
54  
55  
56  
57

## Sensitivity analyses

Due to potential confounding, smoking and Body Mass Index (BMI) were multiply imputed using a multilevel approach (**Supplemental methods**). We also repeated the main analysis in a cohort of patients including only a “confirmed HF diagnosis” (ICD-10 HF diagnosis confirmed by imaging/BNP testing, or adjudicated by a clinician in the absence of echocardiography)<sup>11</sup>.

Analyses were performed with R v4.0.3.

## Results

Baseline characteristics are presented in **Table 1**. In total, 217,329 patients were admitted to hospital in England-Wales due to decompensated HF between 2012 and 2018, with data on COPD/asthma status available (**Supplemental Figure 1**). The median age was 81 years (IQR 72-87) and 53.7% were male. In-hospital death occurred in 12% of patients. COPD was diagnosed in 15% of patients and asthma in 6.6%. Most patients were characterised by either marked or severe breathlessness and half had a recorded HF management plan in place at discharge. Length of stay and deprivation ranking did not differ significantly between patients with COPD-HF, asthma-HF and HF alone. COPD-HF patients were mostly male, were less often admitted to cardiology and were more frequently diagnosed with IHD compared with those with HF alone; hypertension was slightly less common among COPD-HF patients, whereas diabetes was more common. The proportion of patients with HFpEF was marginally higher in the COPD-HF group, compared with the HF-only group. Asthma-HF patients were mostly female, with higher levels of diabetes and hypertension compared to HF-only. Conversely, AF was less common in the asthma-HF compared with the HF-alone group; there were also more patients with HFpEF.

### *In-hospital death*

The association between COPD and in-hospital death, is presented in **Figure 1, Table 2, and Supplementary Table 4**. Overall, COPD was independently associated with increased odds of in-hospital death ([adjusted]OR<sub>adj</sub>, 95% CI: 1.10, 1.06-1.14). The relationship between COPD and in-hospital death differed according to EF: COPD was associated with an increase in mortality in patients with HFrEF (OR<sub>adj</sub>: 1.15, 1.09 – 1.21), but not in those with HFpEF (OR<sub>adj</sub>: 1.05, 0.99–1.10).

Conversely, asthma was associated with a decrease in the odds of in-hospital death compared with HF patients without asthma (OR<sub>adj</sub>, 95%CI: 0.85, 0.79-0.88). The odds of death did not vary by EF status for patients with asthma-HF (**Figure 1, Table 2**).

Sensitivity analyses where smoking status and BMI were imputed due to missing data (**Supplementary Table 5**), and where patients with a confirmed HF diagnosis only were included (**Supplementary Table 6**), showed similar results to the main analysis.

### *Referrals to HF services*

In the fully adjusted models, COPD was associated with decreased likelihood of outpatient referral to a cardiologist (OR<sub>adj</sub>, 95%CI 0.79, 0.77-0.81) and to a HF-MDT (OR<sub>adj</sub>, 95% CI 0.94, 0.91-0.97). Patients with COPD-HFrEF were less likely to be referred to a cardiologist than those with HFrEF without COPD (OR<sub>adj</sub>: 0.85, 95% CI 0.81-0.88) while patients with COPD-HFpEF were significantly less likely to be referred, compared to HFpEF without COPD (OR<sub>adj</sub>, 95%CI% 0.73, 0.70-0.76). COPD was associated with a decreased likelihood of documented HF-MDT referral only for patients with HFpEF (OR<sub>adj</sub>, 95%CI, 0.90, 0.86-0.94).

1  
2  
3 Overall, referral odds did not differ in patients with asthma-HF compared to those with HF-  
4  
5 alone. There was a significant increase in the odds of referral to a cardiologist for those with  
6  
7 asthma-HFrEF ( $OR_{adj}$ , 95%CI 1.08, 1.03-1.14) and a decreased likelihood of referral for patients  
8  
9 with asthma-HFpEF ( $OR_{adj}$  95CI, 0.93, 0.88-0.98), compared to HFrEF, HFpEF-alone, respectively.  
10  
11 Referrals to HF nurse or HF MDT were not different between those with HF alone or HF and  
12  
13 asthma (**Figure 2**).

#### 14 15 16 17 18 *HF medication prescription at discharge*

19  
20 Patients with COPD-HF had lower prescription proportions of ACEIs/ARBs, beta-blockers and  
21  
22 double (ACEi/ARB+beta-blocker) and triple-therapy (ACEi/ARB+beta-blocker+MRA) compared  
23  
24 to those with HF-only. ACEIs/ARBs, MRAs and triple-therapy were prescribed more frequently  
25  
26 in the asthma-HF group compared with the HF-alone group; however beta-blockers or double-  
27  
28 therapy were less often prescribed for asthma-HF vs. HF-alone (**Figure 3**).

29  
30 In patients with HFrEF, COPD and asthma were associated with decreased likelihood of beta-  
31  
32 blocker prescription at discharge ( $OR_{adj}$  0.66, 95%CI 0.59-0.67,  $OR_{adj}$ : 0.57, 95%CI 0.54-0.60).

33  
34 COPD was associated with lower chance of ACEi/ARB prescription, but did not affect MRA  
35  
36 prescriptions, while asthma was associated with increased odds of ACEi/ARB and MRA (**Table**  
37  
38  
39  
40  
41  
42  
43  
44  
45  
46  
47  
48  
49  
50  
51  
52  
53  
54  
55  
56  
57  
58  
59  
60  
**3**).

## Discussion

This is the first study to provide a large assessment of contemporary HF practice, generalisable to the population of England-Wales, evaluating the effect of COPD and asthma on clinical and management outcomes. We found that patients with COPD-HF were more likely to die during

1  
2  
3 their HF admission, compared to patients with HF-only; those with asthma-HF had a reduced  
4  
5 probability of in-hospital death, compared to patients with HF-alone. Referrals to HF services  
6  
7 also differed: COPD was associated with a 21% reduction in post-discharge cardiology referral  
8  
9 whilst a diagnosis of asthma did not affect this outcome.  
10  
11

12  
13 Airways diseases, particularly COPD is associated with adverse events in patients with HF<sup>1-3 12-14</sup>,  
14  
15 however diagnostic misclassification is under-estimated and studies of the independent effect  
16  
17 of asthma are lacking. We report several findings which add to previous literature.  
18  
19

20  
21 The finding that COPD is associated with in-hospital mortality confirms reports from previous  
22  
23 European data which considered longer term follow-ups<sup>15 16</sup>. A greater severity of  
24  
25 cardiovascular disease amongst those with COPD-HF may have contributed to the increase in  
26  
27 mortality, as indicated by the higher proportions of patients in NYHA classes III and IV,  
28  
29 compared with those with HF alone. Further explanations could include admission to non-  
30  
31 cardiology wards for COPD-HF patients, which has been linked with poorer outcomes in acute  
32  
33 HF<sup>17</sup>.  
34  
35  
36  
37

38  
39 A COPD diagnosis was associated with increased in-hospital death in those with HFrEF, but not  
40  
41 in those with HFpEF, which is surprising, given that COPD is suggested to be more severe in the  
42  
43 latter group<sup>18</sup>. In contrast with our report, previous studies found that risk of death is increased  
44  
45 in those with COPD-HFpEF compared to COPD-HFrEF<sup>19 20</sup>, however these may be confounded by  
46  
47 a lack of validity of EF status (inferred by ICD codes rather than echocardiography) or  
48  
49 spirometry to confirm COPD status, consideration of long-term rather than short term effects  
50  
51 on mortality, or by including chronic rather than hospitalised HF. Our result therefore may be  
52  
53 explained by poor uptake of disease-modifying treatments available for HFrEF in those with  
54  
55  
56  
57  
58  
59  
60

1  
2  
3 COPD<sup>15</sup>, which has been previously reported and could be more pronounced in a cohort of  
4  
5 patients newly admitted for HF.  
6

7  
8 After adjusting for age, sex and other baseline characteristics including comorbidities, and  
9  
10 further adjustments for smoking status and BMI, differences between those with and without  
11  
12 COPD, respectively asthma, did not materially change the association between the two lung  
13  
14 diseases with in-hospital mortality. This suggests an independent contribution of COPD to  
15  
16 increased mortality in patients hospitalised with HF, significant beyond the potential  
17  
18 confounders considered in this analysis.  
19  
20  
21

22  
23 While previous reports suggest asthma is associated with increased risk of developing  
24  
25 cardiovascular disease<sup>6</sup>, no prior study has reported on the association between asthma and  
26  
27 death during acute HF hospitalisation. We found that, on average, asthma was independently  
28  
29 associated with a 24% reduction in risk of death in patients with HF. The mechanisms  
30  
31 underlying this epidemiological association are unclear. Several factors may explain our result.  
32  
33 Asthma management is reliant on anti-inflammatory agents such as inhaled corticosteroids  
34  
35 (ICS), which have been linked to cardioprotective effects<sup>21 22</sup> including lower all-cause mortality  
36  
37 and lower risk of myocardial infarction ([MI], a precursor to HF). Potential long-term ICS use in  
38  
39 our asthma-HF cohort could have diminished patients' baseline mortality risk.  
40  
41  
42  
43  
44  
45

46 The nature of inflammation is different in COPD compared with asthma, and influences  
47  
48 response to medication. One hypothesis which may underlie the diverging findings on the  
49  
50 effect of the two lung diseases on outcomes in patients with HF thus relates to differences in  
51  
52 management and their subsequent differential cardiovascular risk. Bronchodilator medications,  
53  
54 which are central to the symptomatic treatment of COPD, have been associated with increased  
55  
56  
57



1  
2  
3 cardiovascular risk<sup>9</sup>. While combination treatments such as ICS/LABA may have a good  
4  
5 cardiovascular safety profile in asthma, this differs in COPD<sup>8 14</sup>. RCTs have not demonstrated  
6  
7 mortality benefits with ICS in individuals with COPD, although some observational studies  
8  
9 suggest the opposite. The largest trial<sup>23</sup> examining all-cause mortality in 16,000 patients with  
10  
11 COPD and risk of cardiovascular disease showed the treatments evaluated (long-acting beta-  
12  
13 agonists and/or inhaled corticosteroids) were well tolerated by patients, however the effect on  
14  
15 patients with existing HF remains under debate.  
16  
17  
18

19  
20 Since both lung diseases were diagnosed prior to HF admission, it would be plausible to assume  
21  
22 that any effects of long-term pulmonary medication could influence the chance of death in our  
23  
24 cohort. Thus, the heightened risk of in-hospital mortality observed in the COPD-HF group, but  
25  
26 not in asthma-HF could be related to more frequent use of bronchodilators and a poorer safety  
27  
28 profile of ICS in COPD compared to asthma. Alternatively, COPD-specific characteristics such as  
29  
30 such as progressive lung function decline may have influenced in-hospital mortality in those  
31  
32 admitted for HF.  
33  
34  
35  
36

37  
38 However, due to large amounts of missing data on respiratory disease medication prescription  
39  
40 in our cohort (**Supplemental Table 7**), we could not verify these assumptions in our dataset.  
41  
42  
43 Future studies incorporating accurate information on bronchodilator use in patients with  
44  
45 concomitant HF and respiratory disease should be conducted.  
46  
47  
48

49  
50 The association between COPD/asthma and referral to follow-up cardiology services has not  
51  
52 been studied before in hospitalised HF patients. Overall, patients with COPD-HF were less likely  
53  
54 to be referred to a cardiology service after hospital discharge, compared with those who had  
55  
56  
57

1  
2  
3 HF-alone. This indicates that a COPD diagnosis may be an obstacle preventing access to HF  
4  
5 specialist care. According to NICE, all patients with a HF diagnosis need to be seen by a HF  
6  
7 specialist within two weeks of discharge, but data suggest these timelines are not met<sup>24</sup>. The  
8  
9 compounded effect of a COPD diagnosis has the potential to further impair the long-term  
10  
11 prognosis of these comorbid patients. Further, more than 60% of patients with COPD and HF  
12  
13 were admitted to a general ward rather than a specialised cardiology ward, which may also  
14  
15 explain the low likelihood of cardiology referrals in this group.  
16  
17  
18  
19  
20

21 Our study also indicated EF status mediated the relationship with referrals, as individuals with  
22  
23 COPD-HFpEF were less likely to have an appointment compared with their COPD-HFrEF  
24  
25 counterparts. This is particularly worrying as HF, irrespective of EF, is best monitored and  
26  
27 managed within specialist HF teams.  
28  
29  
30

31 Asthma did not adversely influence referrals to HF services, but we identified an increased  
32  
33 likelihood of referral to cardiology in asthma-HFpEF as compared with asthma-HFrEF. One  
34  
35 possible explanation is greater uncertainty in clinical management of patients with HFpEF,  
36  
37 leading to increased referral, though this needs to be assessed in future studies. Clarifying these  
38  
39 clinical management pathways offers a potential to improve HF prognosis by ensuring access to  
40  
41 care is timely and tailored to individual patients' risk, pathology, and health.  
42  
43  
44  
45

46 Patients with COPD-HFrEF were 34% less likely to receive a beta-blocker prescription at  
47  
48 discharge, compared with patients with HFrEF alone, despite recent data supporting use of  
49  
50 these agents in COPD<sup>25 26</sup>. Similar to data on patients post-MI<sup>27</sup>, it is worrying that COPD was  
51  
52 also associated with decreased likelihood of guideline recommended ACEi/ARB prescription in  
53  
54  
55  
56  
57

1  
2  
3 those with HF, as there is no contraindication for those with pulmonary disease. Efforts need to  
4  
5 be made to ensure appropriate therapeutic management of these patients.  
6  
7

8  
9 Those with asthma-HFrEF had 43% less chance of being prescribed a beta-blocker compared  
10  
11 with patients with HF-alone. Current guidelines recommend that asthma patients with chronic  
12  
13 HFrEF should not receive disease-modifying beta-blocker treatment due to possible  
14  
15 bronchoconstriction, despite evidence to suggest that cardioselective beta-blockade may be  
16  
17 used with careful up-titration and monitoring<sup>28 29</sup>, where benefits may outweigh risks in  
18  
19 individual patients. Based on the low uptake across the whole spectrum of HF medications in  
20  
21 patients with additional lung disease (**Figure 3**), we expect these patients would have worse  
22  
23 prognosis compared to their more adequately treated counterparts.  
24  
25  
26  
27

28  
29 Considering these results, management needs to be optimized in patients with COPD or asthma  
30  
31 and concurrent HF. The arrival of new treatments such as sodium-glucose co-transporter 2  
32  
33 inhibitors (SGLT2-i) have widened treatment choice in HFrEF, and there is now evidence  
34  
35 supporting their use in individuals with COPD<sup>30</sup>. Given beta-blockers are avoided in asthma,  
36  
37 these new treatments should urgently be assessed in this population, as data are currently  
38  
39 lacking.  
40  
41  
42  
43

#### 44 **Strengths and limitations**

45  
46  
47 The main strength of this study is the large sample size and representativeness of a hospitalised  
48  
49 population with HF from England and Wales. We did not have however have information on  
50  
51 duration and severity of asthma or COPD, nor lung function test results and thus we could not  
52  
53 verify accuracy of these diagnoses, which are often subject to misclassification, especially in the  
54  
55  
56  
57

1  
2  
3 elderly<sup>31</sup>. Data on bronchodilator use was largely missing for our cohort (**Supplemental Table**  
4 **7**), limiting assessment of both diagnostic accuracy of the respiratory diseases, and association  
5  
6 with outcomes evaluated in this study. We also could not differentiate between childhood  
7  
8 asthma or late-onset asthma which may have different implications <sup>32</sup>.  
9  
10

11  
12  
13 HFpEF was determined as a HF diagnosis without systolic dysfunction, which has been used in  
14  
15 previous NHFA reports. Nevertheless, there is no consensus gold standard HFpEF diagnosis<sup>10</sup>  
16  
17 and it remains difficult to validate. Further work in this area is needed, particularly in accurately  
18  
19 distinguishing between HFpEF and COPD, which have similar clinical presentation.  
20  
21

22  
23  
24 There was a considerable proportion of missing data on bronchodilators/inhaled corticosteroids  
25  
26 in the dataset which prevented assessment of whether the impact of COPD and asthma on  
27  
28 outcomes is mediated, in part, by their treatment. Future studies incorporating accurate  
29  
30 information on bronchodilator use in patients with concomitant HF and respiratory disease  
31  
32 should be conducted.  
33  
34

35  
36  
37 Smoking status was also characterised by a large percentage of missing data, however an  
38  
39 analysis using multiple imputation indicated that even after adjusting for this confounder in the  
40  
41 imputed dataset, the association between both COPD and asthma on in-hospital mortality  
42  
43 remained unchanged. (**Supplementary Table 5**).  
44  
45

46  
47 We only focused on decompensated HF and the picture may change when investigating long-  
48  
49 term mortality, recurrent admissions, or other aspects of treatment such as medication  
50  
51 adherence.  
52  
53  
54  
55  
56  
57

1  
2  
3 While the referral likelihood estimates provide a first glimpse into the association between  
4  
5 COPD/asthma and potential healthcare service provision for HF patients in England-Wales, we  
6  
7 did not have access to data on concrete healthcare utilisation amongst our cohort.  
8  
9

10  
11 Due to lack of data, we could not establish whether cause of death varied amongst the groups  
12  
13 and whether the increased mortality associated with COPD was underlined by higher rates of  
14  
15 respiratory versus cardiac or other disease.  
16  
17

## 18 19 **Conclusion**

20  
21  
22 This analysis adds to the growing body of evidence that COPD and asthma affect outcomes in  
23  
24 patients with acute HF. Our data suggest that while COPD is a main contributor to in-hospital  
25  
26 mortality and is associated with decreased referral to cardiology services amongst HF patients,  
27  
28 asthma does not negatively impact these outcomes. Both lung diseases are however  
29  
30 responsible for significant decreases in the prescription of HF treatments at discharge,  
31  
32 particularly beta-blockers. These findings highlight a need for better integration of  
33  
34 cardiopulmonary services with an aim to tailor healthcare provision for these patients.  
35  
36  
37  
38  
39

## 40 41 **Competing interests**

42  
43 CG, CK and RZ have nothing to declare. Prof. Quint's research group has received funds from AZ,  
44  
45 GSK, The Health Foundation, MRC, British Lung Foundation, IQVIA, Chiesi, and Asthma UK outside  
46  
47 the submitted work; grants and personal fees from GlaxoSmithKline, Boehringer Ingelheim,  
48  
49 AstraZeneca, Bayer, Insmmed outside the submitted work.  
50  
51  
52

## 53 54 **Data availability**

1  
2  
3 The data that support the findings of this study have been provided by the Healthcare Quality  
4 Improvement Partnership from the National Heart Failure Audit Programme, but restrictions  
5  
6 apply to the availability of these data and so are not publicly available.  
7  
8  
9

### 10 11 **Financial disclosure**

12  
13  
14 CG is funded by a NHLI PhD studentship. Grant number: N/A.  
15  
16

### 17 **Author contributions**

18  
19  
20 Conceptualization & Methodology: CG, JKQ, CK. Original draft: CG. Editing and final approval:  
21  
22 CG, JKQ, RZ, CK; Data curation & Formal data analysis: CG; Data acquisition: JKQ.  
23  
24  
25

### 26 **Ethics approval**

27  
28 This study involved analysis of pre-existing, de-identified data, thus it was exempt from  
29  
30 Institutional Review Board approval.  
31  
32

### 33 **Patient and public involvement**

34  
35 Patients were not involved in the design and conduct of the study.  
36  
37  
38  
39  
40  
41  
42  
43  
44  
45  
46  
47  
48  
49  
50  
51  
52  
53  
54  
55  
56  
57  
58  
59  
60

### Figure legends

Figure 1 - Association between COPD, asthma and in-hospital death, adjusted for age, sex, valve disease; IHD, hypertension, diabetes, AF, NYHA, place of care and EF status; odds ratio with 95% confidence intervals.

Figure 2. Association between COPD, asthma and referrals to HF services, adjusted for age, sex, valve disease; IHD, hypertension, diabetes, AF, NYHA, place of care and EF status.

Figure 3. HF-medication prescription rates at discharge, according to comorbid respiratory disease status

**Table 1.** Baseline characteristics according to COPD and asthma status, in patients hospitalised for HF in England-Wales.

|                                                 | <b>HF alone<br/>(N=170297)</b> | <b>COPD + HF<br/>(N=32695)</b> | <b>Asthma + HF<br/>(N=14400)</b> | <b>Overall<br/>(N=217,392)</b> |
|-------------------------------------------------|--------------------------------|--------------------------------|----------------------------------|--------------------------------|
| Age, median [IQR]                               | 81 [72, 88]                    | 79 [72, 85]                    | 79 [69, 86]                      | 81 [72, 87]                    |
| Missing                                         | 67 (0.1%)                      | 22 (0.1%)                      | 10 (0.1%)                        | 199 (0.1%)                     |
| Male                                            | 91837 (53.9%)                  | 19072 (58.3%)                  | 5936 (41.2%)                     | 116845 (53.7%)                 |
| Missing                                         | 74 (0.1%)                      | 44 (0.1%)                      | 21 (0.1%)                        | 239 (0.1%)                     |
| <b>Place of admission</b>                       |                                |                                |                                  |                                |
| Cardiology                                      | 76428 (44.9%)                  | 12361 (37.8%)                  | 6147 (42.7%)                     | 94936 (43.7%)                  |
| Other                                           | 93358 (54.8%)                  | 20246 (61.9%)                  | 8218 (57.1%)                     | 21822 (56.0%)                  |
| Missing                                         | 511 (0.3%)                     | 88 (0.3%)                      | 35 (0.2%)                        | 634 (0.3%)                     |
| <b>Died in-hospital</b>                         | 20316 (11.9%)                  | 4181 (12.8%)                   | 1337 (9.3%)                      | 25834 (11.9%)                  |
| <b>Device therapy</b>                           |                                |                                |                                  |                                |
| None                                            | 147485 (86.6%)                 | 28962 (88.6%)                  | 12818 (89.0%)                    | 189265 (87.1%)                 |
| CRT-D                                           | 3047 (1.8%)                    | 496 (1.5%)                     | 189 (1.3%)                       | 3732 (1.7%)                    |
| CRT-P                                           | 1681 (1%)                      | 296 (0.9%)                     | 142 (1%)                         | 2119 (1.0%)                    |
| ICD                                             | 3001 (1.8%)                    | 511 (1.6%)                     | 211 (1.5%)                       | 0 (0%)                         |
| Missing                                         | 15083 (8.9%)                   | 2430 (7.4%)                    | 1040 (7.2%)                      | 18553 (8.5%)                   |
| <b>Comorbidities</b>                            |                                |                                |                                  |                                |
| Valve disease                                   | 38213 (22.4%)                  | 7005 (21.4%)                   | 2906 (20.2%)                     | 48124 (22.1%)                  |
| Missing                                         | 3426 (2.0%)                    | 822 (2.5%)                     | 335 (2.3%)                       | 4583 (2.1%)                    |
| IHD                                             | 65992 (38.8%)                  | 14198 (43.4%)                  | 5175 (35.9%)                     | 85365 (39.3%)                  |
| Missing                                         | 3667 (2.2%)                    | 811 (2.5%)                     | 335 (2.3%)                       | 4813 (2.2%)                    |
| Hypertension                                    | 91477 (53.7%)                  | 16838 (51.5%)                  | 8208 (57%)                       | 116523 (53.6%)                 |
| Missing                                         | 1326 (0.8%)                    | 381 (1.2%)                     | 125 (0.9%)                       | 1832 (0.8%)                    |
| Diabetes                                        | 50194 (29.5%)                  | 10348 (31.7%)                  | 4772 (33.1%)                     | 65314 (30%)                    |
| Missing                                         | 459 (0.3%)                     | 142 (0.4%)                     | 54 (0.4%)                        | 655 (0.3%)                     |
| AF                                              | 72235 (42.4%)                  | 13728 (42%)                    | 5508 (38.2%)                     | 91471 (42.1%)                  |
| <b>Breathlessness (NYHA)</b>                    |                                |                                |                                  |                                |
| No limitation of physical activity              | 12273 (7.2%)                   | 1254 (3.8%)                    | 768 (5.3%)                       | 14295 (6.6%)                   |
| Slight Limitation of ordinary physical activity | 24541 (14.4%)                  | 3951 (12.1%)                   | 1993 (13.8%)                     | 30485 (14%)                    |
| Marked Limitation of ordinary physical activity | 68179 (40%)                    | 13671 (41.8%)                  | 6011 (41.7%)                     | 87861 (40.4%)                  |
| Symptoms at rest or minimal activity            | 54652 (32.1%)                  | 12191 (37.3%)                  | 4809 (33.4%)                     | 71652 (33%)                    |
| Missing                                         | 10652 (6.3%)                   | 1628 (5.0%)                    | 819 (5.7%)                       | 13099 (6.0%)                   |
| <b>Echocardiography performed</b>               | 137955 (81%)                   | 26165 (80%)                    | 11342 (78.8%)                    | 175462 (80.7%)                 |
| <b>Ejection fraction status</b>                 |                                |                                |                                  |                                |
| HFrEF                                           | 92619 (54.4%)                  | 16408 (50.2%)                  | 7334 (50.9%)                     | 116361 (53.5%)                 |



|                                                                                                                                                                                                                                                                                                                                                                                                                                                                                                                                                            | <b>HF alone<br/>(N=170297)</b> | <b>COPD + HF<br/>(N=32695)</b> | <b>Asthma + HF<br/>(N=14400)</b> | <b>Overall<br/>(N=217,392)</b> |
|------------------------------------------------------------------------------------------------------------------------------------------------------------------------------------------------------------------------------------------------------------------------------------------------------------------------------------------------------------------------------------------------------------------------------------------------------------------------------------------------------------------------------------------------------------|--------------------------------|--------------------------------|----------------------------------|--------------------------------|
| HFpEF                                                                                                                                                                                                                                                                                                                                                                                                                                                                                                                                                      | 77678 (45.6%)                  | 16287 (49.8%)                  | 7066 (49.1%)                     | 101031 (46.5%)                 |
| <b>HF management plan</b>                                                                                                                                                                                                                                                                                                                                                                                                                                                                                                                                  |                                |                                |                                  |                                |
| Pre-discharge management plan in place                                                                                                                                                                                                                                                                                                                                                                                                                                                                                                                     | 11760 (6.9%)                   | 2152 (6.6%)                    | 1002 (7.0%)                      | 14914 (6.9%)                   |
| Management plan has been discussed with the patient                                                                                                                                                                                                                                                                                                                                                                                                                                                                                                        | 10572 (6.2%)                   | 1894 (5.8%)                    | 954 (6.6%)                       | 13420 (6.2%)                   |
| Management plan has been communicated to the primary care team                                                                                                                                                                                                                                                                                                                                                                                                                                                                                             | 19880 (11.7%)                  | 3963 (12.1%)                   | 1780 (12.4%)                     | 25623 (11.8%)                  |
| All of the above                                                                                                                                                                                                                                                                                                                                                                                                                                                                                                                                           | 83507 (49%)                    | 15496 (47.4%)                  | 7140 (49.6%)                     | 106143 (48.8%)                 |
| No plan                                                                                                                                                                                                                                                                                                                                                                                                                                                                                                                                                    | 18021 (10.6%)                  | 3937 (12.0%)                   | 1546 (10.7%)                     | 23504 (10.8%)                  |
| Missing                                                                                                                                                                                                                                                                                                                                                                                                                                                                                                                                                    | 26557 (15.6%)                  | 5253 (16.1%)                   | 1978 (13.7%)                     | 33788 (15.5%)                  |
| <b>Referral to HF MDT</b>                                                                                                                                                                                                                                                                                                                                                                                                                                                                                                                                  | 53898 (31.6%)                  | 9719 (29.7%)                   | 4455 (30.9%)                     | 68072 (31.3%)                  |
| Missing                                                                                                                                                                                                                                                                                                                                                                                                                                                                                                                                                    | 29946 (17.6%)                  | 5722 (17.5%)                   | 2216 (15.4%)                     | 37884 (17.4%)                  |
| <b>Referral to cardiology follow up</b>                                                                                                                                                                                                                                                                                                                                                                                                                                                                                                                    | 70925 (41.6%)                  | 11875 (36.3%)                  | 6241 (43.3%)                     | 89041 (41%)                    |
| Missing                                                                                                                                                                                                                                                                                                                                                                                                                                                                                                                                                    | 13827 (8.1%)                   | 2882 (8.8%)                    | 984 (6.8%)                       | 17693 (8.1%)                   |
| <b>Referral to HF nurse follow-up</b>                                                                                                                                                                                                                                                                                                                                                                                                                                                                                                                      | 76170 (44.7%)                  | 13728 (42.0%)                  | 6249 (43.4%)                     | 96147 (44.2%)                  |
| Missing                                                                                                                                                                                                                                                                                                                                                                                                                                                                                                                                                    | 13442 (7.9%)                   | 2658 (8.1%)                    | 952 (6.6%)                       | 17052 (7.8%)                   |
| <b>LOS</b>                                                                                                                                                                                                                                                                                                                                                                                                                                                                                                                                                 |                                |                                |                                  |                                |
| Median [IQR]                                                                                                                                                                                                                                                                                                                                                                                                                                                                                                                                               | 8 [3, 15]                      | 8 [4, 16]                      | 7 [3, 14]                        | 8 [4, 15]                      |
| <b>IMD Wales (quartile)</b>                                                                                                                                                                                                                                                                                                                                                                                                                                                                                                                                | <b>N=8205</b>                  | <b>N=1889</b>                  | <b>N=776</b>                     | <b>N= N=10870</b>              |
| 1 <sup>st</sup> (most deprived)                                                                                                                                                                                                                                                                                                                                                                                                                                                                                                                            | 2126 (25.9%)                   | 371 (19.6%)                    | 188 (24.2%)                      | 2685 (24.7%)                   |
| 2 <sup>nd</sup>                                                                                                                                                                                                                                                                                                                                                                                                                                                                                                                                            | 2058 (25.1%) 396               | (21.0%)<br>190                 | (24.5%)<br>83                    | 2644 (24.3%)                   |
| 3 <sup>rd</sup>                                                                                                                                                                                                                                                                                                                                                                                                                                                                                                                                            | 1977 (24.1%)                   | 459 (24.3%)                    | 196 (25.3%)                      | 2632 (24.2%)                   |
| 4 <sup>th</sup> (least deprived)                                                                                                                                                                                                                                                                                                                                                                                                                                                                                                                           | 1824 (22.2%)                   | 607 (32.1%)                    | 185 (23.8%)                      | 2616 (24.1%)                   |
| Missing*                                                                                                                                                                                                                                                                                                                                                                                                                                                                                                                                                   | -                              | -                              | -                                | -                              |
| <b>IMD England (quartile)</b>                                                                                                                                                                                                                                                                                                                                                                                                                                                                                                                              | <b>N=159540</b>                | <b>N=30352</b>                 | <b>N=13433</b>                   | <b>N=203325</b>                |
| 1 <sup>st</sup> (most deprived)                                                                                                                                                                                                                                                                                                                                                                                                                                                                                                                            | 35836 (22.5%)                  | 9338 (30.8%)                   | 3449 (25.7%)                     | 48623 (23.9%)                  |
| 2 <sup>nd</sup>                                                                                                                                                                                                                                                                                                                                                                                                                                                                                                                                            | 38347 (24.0%)                  | 7762 (25.6%)                   | 3403 (25.3%)                     | 49512 (24.4%)                  |
| 3 <sup>rd</sup>                                                                                                                                                                                                                                                                                                                                                                                                                                                                                                                                            | 40131 (25.2%)                  | 6848 (22.6%)                   | 3166 (23.6%)                     | 50145 (24.7%)                  |
| 4 <sup>th</sup> (least deprived)                                                                                                                                                                                                                                                                                                                                                                                                                                                                                                                           | 41387 (25.9%)                  | 5615 (18.5%)                   | 3072 (22.9%)                     | 50074 (24.6%)                  |
| Missing                                                                                                                                                                                                                                                                                                                                                                                                                                                                                                                                                    | 3839 (2.4%)                    | 789 (2.6%)                     | 343 (2.6%)                       | 4971 (2.4%)                    |
| AF= atrial fibrillation; COPD= chronic obstructive pulmonary disease; CRT-P= cardiac resynchronisation therapy pacemaker; CRT-D= cardiac resynchronisation therapy defibrillator; HF= heart failure; HFReEF= heart failure with reduced ejection fraction; *HFpEF= heart failure with preserved ejection fraction; ICD= implantable cardioverter defibrillator; IHD= ischemic heart disease; IMD= indices of multiple deprivation; LOS= length of stay; MDT= multi-disciplinary team; NYHA = New York Heart Association; * not shown due to small numbers. |                                |                                |                                  |                                |

**Table 2 – Association between COPD, asthma and outcomes in patients hospitalised for HF in England-Wales**

| Outcome                                                                                                                                                                                                                                                                | Fully adjusted <sup>a</sup> interaction model<br>COPD*EF<br>OR (95% CI) |                                                 | Fully adjusted <sup>b</sup> interaction model<br>Asthma*EF<br>OR (95% CI) |                               |
|------------------------------------------------------------------------------------------------------------------------------------------------------------------------------------------------------------------------------------------------------------------------|-------------------------------------------------------------------------|-------------------------------------------------|---------------------------------------------------------------------------|-------------------------------|
|                                                                                                                                                                                                                                                                        | COPD * HFpEF                                                            | COPD* HFpEF                                     | Asthma * HFpEF                                                            | Asthma * HFpEF                |
| <b>In-hospital death</b><br>(N= 194,156 <sup>c</sup> )                                                                                                                                                                                                                 | Interaction <i>P</i> -value = 0.01                                      |                                                 | Interaction <i>P</i> -value = 0.842                                       |                               |
| Fixed-effects                                                                                                                                                                                                                                                          | 1.15 (1.09 – 1.21,<br>p=0.294*10 <sup>-10</sup> )                       | 1.05 (0.99 – 1.10,<br>p=0.081)                  | -                                                                         | -                             |
| <i>Random effects (hospitals, n=216)</i>                                                                                                                                                                                                                               |                                                                         |                                                 |                                                                           |                               |
| <i>Variance</i>                                                                                                                                                                                                                                                        | 0.201                                                                   |                                                 | -                                                                         |                               |
| <i>LR test P-value<sup>d</sup></i>                                                                                                                                                                                                                                     | <i>P</i> =0.22*10 <sup>-16</sup>                                        |                                                 | -                                                                         | -                             |
| <b>Referral to cardiology follow-up</b><br>(N= 166,658 <sup>c</sup> )                                                                                                                                                                                                  | Interaction <i>P</i> -value= 0.288*10 <sup>-7</sup>                     |                                                 | Interaction <i>P</i> -value=0.0001                                        |                               |
| Fixed effects                                                                                                                                                                                                                                                          | 0.85 (0.81, 0.88,<br>p=0.2*10 <sup>-16</sup> )                          | 0.73 (0.70, 0.76,<br>p=0.2*10 <sup>-16</sup> )  | 1.08 (1.03-1.14,<br>p=0.2*10 <sup>-16</sup> )                             | 0.93 (0.88- 0.98,<br>p=0.003) |
| <i>Random effects (hospitals, n=216)</i>                                                                                                                                                                                                                               |                                                                         |                                                 |                                                                           |                               |
| <i>Variance</i>                                                                                                                                                                                                                                                        | 0.512                                                                   |                                                 | 0.512                                                                     |                               |
| <i>LR test p-value<sup>d</sup></i>                                                                                                                                                                                                                                     | 0.22*10 <sup>-16</sup>                                                  |                                                 | <i>P</i> =0.22*10 <sup>-16</sup>                                          |                               |
| <b>Referral to HF MDT</b><br>(N=149,098 <sup>c</sup> )                                                                                                                                                                                                                 | Interaction <i>P</i> -value = 0.017                                     |                                                 | Interaction <i>P</i> -value=0.095                                         |                               |
| Fixed effects                                                                                                                                                                                                                                                          | 0.97 (0.93, 1.02,<br>p=0.263)                                           | 0.90 (0.86, 0.94,<br>p=0.265*10 <sup>-5</sup> ) | -                                                                         | -                             |
| <i>Random effects (hospitals, n=216)</i>                                                                                                                                                                                                                               |                                                                         |                                                 |                                                                           |                               |
| <i>Variance</i>                                                                                                                                                                                                                                                        | 2.139                                                                   |                                                 | -                                                                         |                               |
| <i>LR test p-value<sup>d</sup></i>                                                                                                                                                                                                                                     | 0.22*10 <sup>-16</sup>                                                  |                                                 | -                                                                         | -                             |
| <b>Referral to HF nurse</b><br>(N= 166,723 <sup>c</sup> )                                                                                                                                                                                                              | Interaction <i>P</i> -value = 0.249                                     |                                                 | Interaction <i>P</i> -value = 0.450                                       |                               |
| COPD= chronic obstructive pulmonary disease; HF= heart failure; HFpEF= heart failure with reduced ejection fraction; HFpEF= heart failure with preserved ejection fraction; LR= likelihood ratio; MDT= multidisciplinary team; OR= odds ratio; CI= confidence interval |                                                                         |                                                 |                                                                           |                               |
| <sup>a</sup> Adjusted for age, sex, diabetes, hypertension, ischemic heart disease, atrial fibrillation, asthma, place of care and New York Heart Association status                                                                                                   |                                                                         |                                                 |                                                                           |                               |
| <sup>b</sup> Adjusted for age, sex, diabetes, hypertension, ischemic heart disease, atrial fibrillation, COPD, place of care and New York Heart Association status                                                                                                     |                                                                         |                                                 |                                                                           |                               |
| <sup>c</sup> Excludes patients with missing data on covariates included in model                                                                                                                                                                                       |                                                                         |                                                 |                                                                           |                               |

<sup>d</sup> Likelihood ratio test comparing fixed to random effects for hospital model fit, significant indicates random effects model performed better than fixed effects model

For peer review only

**Table 3. Association between COPD, asthma and HF medication prescription at discharge, in patients with HFrEF**

| Medication prescription at discharge                                                                                                                                                                                                                                                                                                                                                                                                                                                                                                                                                                                                              | COPD unadjusted OR (95%CI)                    | COPD fully adjusted <sup>a</sup> OR (95%CI)  | Asthma unadjusted OR (95%CI)                 | Asthma fully adjusted <sup>b</sup> OR (95%CI) |
|---------------------------------------------------------------------------------------------------------------------------------------------------------------------------------------------------------------------------------------------------------------------------------------------------------------------------------------------------------------------------------------------------------------------------------------------------------------------------------------------------------------------------------------------------------------------------------------------------------------------------------------------------|-----------------------------------------------|----------------------------------------------|----------------------------------------------|-----------------------------------------------|
| <b>Beta-blockers (N= 86449<sup>a,b</sup>)</b>                                                                                                                                                                                                                                                                                                                                                                                                                                                                                                                                                                                                     |                                               |                                              |                                              |                                               |
| Fixed effects                                                                                                                                                                                                                                                                                                                                                                                                                                                                                                                                                                                                                                     | 0.61 (0.58, 0.64, p=0.22*10 <sup>-16</sup> )  | 0.66 (0.64, 0.68, P=0.22*10 <sup>-16</sup> ) | 0.63 (0.59, 0.67, p=0.22*10 <sup>-16</sup> ) | 0.57 (0.54 0.60, p=0.22*10 <sup>-16</sup> )   |
| Random effects                                                                                                                                                                                                                                                                                                                                                                                                                                                                                                                                                                                                                                    |                                               |                                              |                                              |                                               |
| Variance                                                                                                                                                                                                                                                                                                                                                                                                                                                                                                                                                                                                                                          | 0.553                                         | 0.578                                        | 0.549                                        | 0.578                                         |
| LR test p-value                                                                                                                                                                                                                                                                                                                                                                                                                                                                                                                                                                                                                                   | 0.22*10 <sup>-16</sup>                        | 0.22*10 <sup>-16</sup>                       | 0.22*10 <sup>-16</sup>                       | 0.22*10 <sup>-16</sup>                        |
| <b>ACEis/ARBs (N=96080<sup>a,b</sup>)</b>                                                                                                                                                                                                                                                                                                                                                                                                                                                                                                                                                                                                         |                                               |                                              |                                              |                                               |
| Fixed effects                                                                                                                                                                                                                                                                                                                                                                                                                                                                                                                                                                                                                                     | 0.87 (0.84, 0.90, p=0.139*10 <sup>-13</sup> ) | 0.91 (0.87-0.95, p=0.256*10 <sup>-6</sup> )  | 1.13 (1.07, 1.19, p=0.16*10 <sup>-6</sup> )  | 1.07 (1.01, 1.13, p=0.0143)                   |
| Random effects                                                                                                                                                                                                                                                                                                                                                                                                                                                                                                                                                                                                                                    |                                               |                                              |                                              |                                               |
| Variance                                                                                                                                                                                                                                                                                                                                                                                                                                                                                                                                                                                                                                          | 0.149                                         | 0.130                                        | 0.148                                        | 0.130                                         |
| LR test p-value                                                                                                                                                                                                                                                                                                                                                                                                                                                                                                                                                                                                                                   | 0.22*10 <sup>-16</sup>                        | 0.22*10 <sup>-16</sup>                       | 0.22*10 <sup>-16</sup>                       | 0.22*10 <sup>-16</sup>                        |
| <b>MRA (N=96080<sup>a,b</sup>)</b>                                                                                                                                                                                                                                                                                                                                                                                                                                                                                                                                                                                                                |                                               |                                              |                                              |                                               |
| Fixed effects                                                                                                                                                                                                                                                                                                                                                                                                                                                                                                                                                                                                                                     | 0.97 (0.94, 1.01, p=0.114)                    | 1.02 (0.98, 1.06, p=0.268)                   | 1.08 (1.04, 1.13, p=0.00043)                 | 1.07 (1.02, 1.12, p=0.0084)                   |
| Random effects                                                                                                                                                                                                                                                                                                                                                                                                                                                                                                                                                                                                                                    |                                               |                                              |                                              |                                               |
| Variance                                                                                                                                                                                                                                                                                                                                                                                                                                                                                                                                                                                                                                          | 0.232                                         | 0.195                                        | 0.226                                        | 0.195                                         |
| LR test p-value                                                                                                                                                                                                                                                                                                                                                                                                                                                                                                                                                                                                                                   | 0.22*10 <sup>-16</sup>                        | 0.22*10 <sup>-16</sup>                       | 0.22*10 <sup>-16</sup>                       | 0.22*10 <sup>-16</sup>                        |
| Abbreviations<br>COPD= chronic obstructive pulmonary disease; OR= odd ratio; CI= confidence intervals; LR= likelihood ratio<br><sup>a</sup> Adjusted for age, sex, diabetes, hypertension, ischemic heart disease, atrial fibrillation, asthma, place of care and New York Heart Association status<br><sup>b</sup> Adjusted for age, sex, diabetes, hypertension, ischemic heart disease, atrial fibrillation, COPD, place of care and New York Heart Association status<br>Likelihood ratio test comparing fixed to random effects for hospital model fit, significant indicates random effects model performed better than fixed effects model |                                               |                                              |                                              |                                               |

## References

1. Lawson CA, Mamas MA, Jones PW, et al. Association of Medication Intensity and Stages of Airflow Limitation With the Risk of Hospitalization or Death in Patients With Heart Failure and Chronic Obstructive Pulmonary Disease. *JAMA Netw Open* 2018;1(8):e185489. doi: 10.1001/jamanetworkopen.2018.5489 [published Online First: 2019/01/16]
2. Gulea C, Zakeri R, Quint JK. Impact of chronic obstructive pulmonary disease on readmission after hospitalization for acute heart failure: A nationally representative US cohort study. *Int J Cardiol* 2019;290:113-18. doi: 10.1016/j.ijcard.2019.04.087 [published Online First: 2019/05/19]
3. Hawkins NM, Virani S, Ceconi C. Heart failure and chronic obstructive pulmonary disease: the challenges facing physicians and health services. *Eur Heart J* 2013;34(36):2795-803. doi: 10.1093/eurheartj/ehz192 [published Online First: 2013/07/09]
4. Lipworth B, Wedzicha J, Devereux G, et al. Beta-blockers in COPD: time for reappraisal. *Eur Respir J* 2016;48(3):880-8. doi: 10.1183/13993003.01847-2015 [published Online First: 2016/07/09]
5. Baker JG, Wilcox RG. beta-Blockers, heart disease and COPD: current controversies and uncertainties. *Thorax* 2017;72(3):271-76. doi: 10.1136/thoraxjnl-2016-208412 [published Online First: 2016/12/09]
6. Polleveck ME, Xu KY, Mhango G, et al. The Relationship Between Asthma and Cardiovascular Disease: An Examination of the Framingham Offspring Study. *Chest* 2020 doi: 10.1016/j.chest.2020.11.053 [published Online First: 2020/12/15]
7. Iribarren C, Tolstykh IV, Miller MK, et al. Adult asthma and risk of coronary heart disease, cerebrovascular disease, and heart failure: a prospective study of 2 matched cohorts. *Am J Epidemiol* 2012;176(11):1014-24. doi: 10.1093/aje/kws181 [published Online First: 2012/11/10]
8. Buist AS. Similarities and differences between asthma and chronic obstructive pulmonary disease: treatment and early outcomes. *Eur Respir J Suppl* 2003;39:30s-35s. doi: 10.1183/09031936.03.00404903 [published Online First: 2003/02/08]
9. Salpeter SR, Ormiston TM, Salpeter EE. Cardiovascular effects of beta-agonists in patients with asthma and COPD: a meta-analysis. *Chest* 2004;125(6):2309-21. doi: 10.1378/chest.125.6.2309 [published Online First: 2004/06/11]
10. Pieske B, Tschope C, de Boer RA, et al. How to diagnose heart failure with preserved ejection fraction: the HFA-PEFF diagnostic algorithm: a consensus recommendation from the Heart Failure Association (HFA) of the European Society of Cardiology (ESC). *Eur Heart J* 2019;40(40):3297-317. doi: 10.1093/eurheartj/ehz641 [published Online First: 2019/09/11]
11. The heart failure dataset for the National Audit of Heart failure. <https://www.nicor.org.uk/national-cardiac-audit-programme/datasets/>, Accessed 26 April 2021.
12. Hawkins NM, Petrie MC, Jhund PS, et al. Heart failure and chronic obstructive pulmonary disease: diagnostic pitfalls and epidemiology. *Eur J Heart Fail* 2009;11(2):130-9. doi: 10.1093/eurjhf/hfn013 [published Online First: 2009/01/27]
13. Lainscak M, Anker SD. Heart failure, chronic obstructive pulmonary disease, and asthma: numbers, facts, and challenges. *ESC Heart Fail* 2015;2(3):103-07. doi: 10.1002/ehf2.12055 [published Online First: 2016/10/07]
14. Rabe KF, Hurst JR, Suissa S. Cardiovascular disease and COPD: dangerous liaisons? *Eur Respir Rev* 2018;27(149) doi: 10.1183/16000617.0057-2018 [published Online First: 2018/10/05]
15. Canepa M, Straburzynska-Migaj E, Drozd J, et al. Characteristics, treatments and 1-year prognosis of hospitalized and ambulatory heart failure patients with chronic obstructive pulmonary disease in the European Society of Cardiology Heart Failure Long-Term Registry. *Eur J Heart Fail* 2018;20(1):100-10. doi: 10.1002/ejhf.964 [published Online First: 2017/09/28]
16. Staszewsky L, Cortesi L, Tettamanti M, et al. Outcomes in patients hospitalized for heart failure and chronic obstructive pulmonary disease: differences in clinical profile and treatment between 2002 and 2009. *Eur J Heart Fail* 2016;18(7):840-8. doi: 10.1002/ejhf.519 [published Online First: 2016/04/22]
17. Gheorghide M, Sopko G, De Luca L, et al. Navigating the crossroads of coronary artery disease and heart failure. *Circulation* 2006;114(11):1202-13. doi: 10.1161/CIRCULATIONAHA.106.623199 [published Online First: 2006/09/13]
18. Iversen KK, Kjaergaard J, Akkan D, et al. Chronic obstructive pulmonary disease in patients admitted with heart failure. *J Intern Med* 2008;264(4):361-9. doi: 10.1111/j.1365-2796.2008.01975.x [published Online First: 2008/06/10]
19. Ather S, Chan W, Bozkurt B, et al. Impact of noncardiac comorbidities on morbidity and mortality in a predominantly male population with heart failure and preserved versus reduced ejection fraction. *J Am Coll Cardiol* 2012;59(11):998-1005. doi: 10.1016/j.jacc.2011.11.040 [published Online First: 2012/03/10]
20. Museedi AS, Alshami A, Douedi S, et al. Predictability of Inpatient Mortality of Different Comorbidities in Both Types of Acute Decompensated Heart Failure: Analysis of National Inpatient Sample. *Cardiol Res* 2021;12(1):29-36. doi: 10.14740/cr1186 [published Online First: 2021/01/16]
21. Camargo CA, Barr RG, Chen R, et al. Prospective study of inhaled corticosteroid use, cardiovascular mortality, and all-cause mortality in asthmatic women. *Chest* 2008;134(3):546-51. doi: 10.1378/chest.07-3126 [published Online First: 2008/07/22]

- 1  
2  
3 22. Suissa S, Assimes T, Brassard P, et al. Inhaled corticosteroid use in asthma and the prevention of myocardial infarction. *The American Journal of Medicine* 2003;115(5):377-81. doi: 10.1016/s0002-9343(03)00393-0
- 4  
5 23. Vestbo J, Anderson, J.A., Brook, R.D., Calverley, P.M., Celli, B.R., Crim, C., Martinez, F., Yates, J., Newby, D.E. and Summit  
6 Investigators. Fluticasone furoate and vilanterol and survival in chronic obstructive pulmonary disease with  
7 heightened cardiovascular risk (SUMMIT): a double-blind randomised controlled trial. *The Lancet*  
8 2016;387(10030):1817-26.
- 9 24. Hayhoe B, Kim D, Aylin PP, et al. Adherence to guidelines in management of symptoms suggestive of heart failure in primary  
10 care. *Heart* 2019;105(9):678-85. doi: 10.1136/heartjnl-2018-313971 [published Online First: 2018/12/06]
- 11 25. Gulea C, Zakeri R, Quint JK. Effect of beta-blocker therapy on clinical outcomes, safety, health-related quality of life and  
12 functional capacity in patients with chronic obstructive pulmonary disease (COPD): a protocol for a systematic  
13 literature review and meta-analysis with multiple treatment comparison. *BMJ Open* 2018;8(11):e024736. doi:  
14 10.1136/bmjopen-2018-024736 [published Online First: 2018/11/16]
- 15 26. Salpeter SR, Ormiston TM, Salpeter EE, et al. Cardioselective beta-blockers for chronic obstructive pulmonary disease: a  
16 meta-analysis. *Respiratory Medicine* 2003;97(10):1094-101. doi: 10.1016/s0954-6111(03)00168-9
- 17 27. Rothnie KJ, Liam Smeeth, Emily Herrett, Neil Pearce, Harry Hemingway, Jadwiga Wedzicha, Adam Timmis, and Jennifer K.  
18 Quint. Closing the mortality gap after a myocardial infarction in people with and without chronic obstructive  
19 pulmonary disease. *Heart* 2015;101(14):1103-10.
- 20 28. Shaw SM, Williams SG. Should beta-blockade continue to be withheld from patients with chronic heart failure and asthma?  
21 *European Heart Journal* 2009;30(10):1287-87. doi: 10.1093/eurheartj/ehp146
- 22 29. Gulea C, Zakeri R, Alderman V, et al. Beta-blocker therapy in patients with COPD: a systematic literature review and meta-  
23 analysis with multiple treatment comparison. *Respir Res* 2021;22(1):64. doi: 10.1186/s12931-021-01661-8 [published  
24 Online First: 2021/02/25]
- 25 30. Canepa M, Ameri P, Lainscak M. Chronic obstructive pulmonary disease and comorbidities in heart failure: the next frontier  
26 of sodium-glucose co-transporter 2 inhibitors? *Eur J Heart Fail* 2021 doi: 10.1002/ejhf.2109 [published Online First:  
27 2021/01/28]
- 28 31. Bloom CI, Nissen F, Douglas IJ, et al. Exacerbation risk and characterisation of the UK's asthma population from infants to  
29 old age. *Thorax* 2018;73(4):313-20. doi: 10.1136/thoraxjnl-2017-210650 [published Online First: 2017/10/28]
- 30 32. Ingebrigtsen TS, Marott JL, Vestbo J, et al. Coronary heart disease and heart failure in asthma, COPD and asthma-COPD  
31 overlap. *BMJ Open Respir Res* 2020;7(1) doi: 10.1136/bmjresp-2019-000470 [published Online First: 2020/12/30]
- 32  
33  
34  
35  
36  
37  
38  
39  
40  
41  
42  
43  
44  
45  
46  
47  
48  
49  
50  
51  
52  
53  
54  
55  
56  
57  
58  
59  
60



581x452mm (118 x 118 DPI)

1  
2  
3  
4  
5  
6  
7  
8  
9  
10  
11  
12  
13  
14  
15  
16  
17  
18  
19  
20  
21  
22  
23  
24  
25  
26  
27  
28  
29  
30  
31  
32  
33  
34  
35  
36  
37  
38  
39  
40  
41  
42  
43  
44  
45  
46  
47  
48  
49  
50  
51  
52  
53  
54  
55  
56  
57  
58  
59  
60

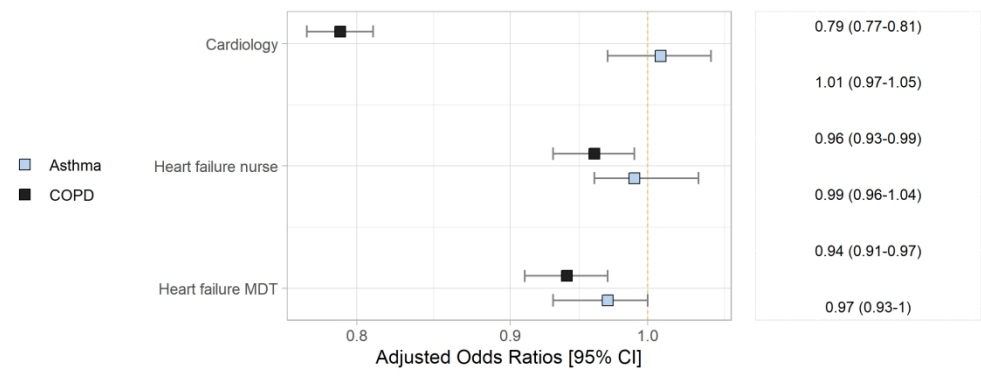

516x193mm (118 x 118 DPI)



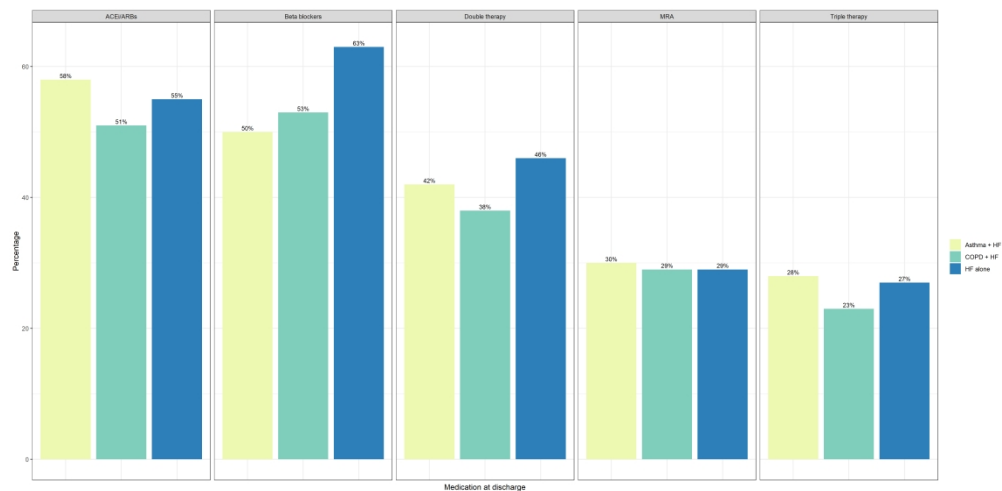

1291x645mm (118 x 118 DPI)

## Supplemental Material

### Supplemental Methods

#### Data source

The NHFA was established in 2007 for hospitals in England-Wales to assess the quality of care and outcomes of hospitalised patients with a HF diagnosis in the first position at death or discharge, identified using ICD-10 codes (**Supplementary Table 1**). Admissions coded in the audit are compared to HF episodes in the Hospital Episode Statistics (HES) in England and the Patient Episode Database of Wales (PEDW) to determine the case ascertainment rate. The number of participating NHS trusts fluctuated from 145 in 2012–13 (97%) to 136 (82%) in 2017/2018. This corresponds to an increase from capturing 60% of national HF admissions in 2012, to 76% at the end of April 2018. Data are entered into the audit by hospital staff, using case ascertainment forms and data are categorised as mandatory (main indicators such as HF treatments, comorbidities, echocardiography) or non-mandatory (i.e., smoking status, pulmonary oedema, ethnicity). Since non-mandatory data elements are not expected to be included, there are considerable proportions of missing data across these variables (**Supplementary Table 2**). Some mandatory variables also have significant amounts of missing data (e.g., more than 70% missing data on BNP measurements, weight, height). The breadth of variables collected varied throughout the history of the audit, to reflect changes in HF guidelines and quality standards, which evolved over time. For example, haemoglobin and serum creatinine were collected routinely only after 2012<sup>1</sup>.

#### Statistical analysis

The analysis for the main outcome was implemented in a stepwise manner. First, an unconditional model including COPD was considered. In a second step we added asthma. Third, we added an interaction term between COPD and asthma, to assess whether both diagnoses had a significant contribution to the model. In lack of statistical significance these patients were not considered in further analyses. We then evaluated effect modification by EF status (HF<sub>r</sub>EF/HF<sub>p</sub>EF) by including separately an interaction term between COPD and EF, then asthma and EF.

#### *Handling of missing data*

#### **Sensitivity analysis – missing data imputation**

1  
2  
3 While the proportions of missing data (see above) were considerable, we deemed necessary to investigate further two important  
4 factors: “smoking status” and “Body Mass Index (BMI)”. In particular, we were interested in assessing whether COPD has an  
5 independent association with death in patients with HF, when controlling for smoking status, or whether the relationship is  
6 influenced by this factor.  
7  
8

9 We assumed data on smoking and BMI to be missing at random in our cohort, as the distribution in observed cases was similar to  
10 other UK cohorts of patients with HF<sup>2,3</sup>. We then used a multi-level approach<sup>4</sup> which takes into consideration the hierarchical data  
11 structure, clustered at hospital level. A Gibbs sampling procedure was used to generate 20 imputed data sets after a burn-in of 1000  
12 iterations.  
13  
14  
15  
16  
17  
18  
19  
20  
21  
22  
23  
24  
25  
26  
27  
28  
29  
30  
31  
32  
33  
34  
35  
36  
37  
38  
39  
40  
41  
42  
43  
44  
45  
46  
47

1  
2  
3  
4  
5  
6  
7  
8  
9  
10  
11  
12  
13  
14  
15  
16  
17  
18  
19  
20  
21  
22  
23  
24  
25  
26  
27  
28  
29  
30  
31  
32  
33  
34  
35  
36  
37  
38  
39  
40  
41  
42  
43  
44  
45  
46  
47

**Table 1.** Inclusion criteria for National Heart Failure Audit

| <b>ICD-10 code</b>                                                                    | <b>Diagnosis</b>                                           |
|---------------------------------------------------------------------------------------|------------------------------------------------------------|
| I11.0                                                                                 | Hypertensive heart disease with (congestive) heart failure |
| I25.5                                                                                 | Ischaemic cardiomyopathy                                   |
| I42.0                                                                                 | Dilated cardiomyopathy                                     |
| I42.9                                                                                 | Cardiomyopathy, unspecified                                |
| I50.0                                                                                 | Congestive heart failure                                   |
| I50.1                                                                                 | Left ventricular failure                                   |
| I50.9                                                                                 | Heart failure, unspecified                                 |
| ICD= International Statistical Classification of Diseases and Related Health Problems |                                                            |

**Table 2.** Comorbidity definitions, according to NHFA dataset<sup>1</sup>, variables recorded from patient history

|                                 |                                                                                                                                                                                                                             |
|---------------------------------|-----------------------------------------------------------------------------------------------------------------------------------------------------------------------------------------------------------------------------|
| <b>COPD</b>                     | History of COPD - chronic bronchitis, emphysema or their cooccurrence. Must be indicated by pulmonary function testing evidence .ie FEV1<75% predicted value or use of beta agonist/steroid inhalers.                       |
| <b>Asthma</b>                   | History of childhood asthma and atopy, or asthma confirmed by respiratory physician for adult onset.                                                                                                                        |
| <b>Diabetes</b>                 | Diagnosis of diabetes prior to admission. This includes a confirmed diagnosis of diabetes and/or the use of an oral hypoglycaemic agent or insulin, and/or a fasting blood glucose >6.7, and/or a random blood glucose >11. |
| <b>Hypertension</b>             | Recorded Blood Pressure >140/90 on at least two occasions prior to admission, or already receiving treatment (drug, dietary or lifestyle) for hypertension                                                                  |
| <b>Ischemic heart disease</b>   | History of myocardial infarction, angina, ECG evidence of MI, CABG or angiogram documenting coronary artery disease.                                                                                                        |
| <b>Cerebrovascular accident</b> | A past neurological deficit of cerebrovascular cause, including episodes that persist beyond 24 hours and transient ischaemic attacks lasting less than 24 hours.                                                           |
| <b>Atrial fibrillation</b>      | An ECG was performed showing atrial fibrillation.                                                                                                                                                                           |
| <b>Valve disease</b>            | History of clinically diagnosed valve disease, moderate or severe stenosis or regurgitation on imaging, or an operative valve replacement/repair                                                                            |

<sup>1</sup> Available: <https://www.nicor.org.uk/national-cardiac-audit-programme/datasets/>

**Table 3.** Model building - association between COPD, asthma (including interaction with ejection fraction group) and in-hospital death in patients hospitalised for heart failure.

| Predictors                                              | Model 1                      | Model 2                        | Model 3                                            | Model 4                                    | Model 5a                               | Model 5b                                   | Model 6                                   |
|---------------------------------------------------------|------------------------------|--------------------------------|----------------------------------------------------|--------------------------------------------|----------------------------------------|--------------------------------------------|-------------------------------------------|
| <b>Fixed effects<br/>[coefficient<br/>estimate, SE]</b> |                              |                                |                                                    |                                            |                                        |                                            |                                           |
| <b>COPD</b>                                             | 0.064<br>[0.017,<br>p<0.001] | 0.0706<br>[0.0174,<br>p<0.001] | 0.060<br>[0.018,<br>p<0.001]                       | -0.0445<br>[0.0256,<br>p=0.081]            | 0.064 [0.017,<br>p<0.001]              | -0.029<br>[0.0242,<br>p=0.232]             | 0.0468 [0.026,<br>p=0.081]                |
| Asthma                                                  | -                            | -0.263<br>[0.0255,<br>p<0.001] | -0.287<br>[0.029,<br>p<0.001]                      | -0.302 [0.040,<br>p<0.001]                 | -0.2719<br>[0.034,<br>p<0.001]         | -0.266<br>[0.0255,<br>p<0.001]             | -0.179 [0.028,<br>p<0.001]                |
| COPD*Asthma                                             | -                            | -                              | <b>0.098</b><br><b>[0.0573,</b><br><b>p=0.087]</b> | 0.149 [0.076,<br>p=0.051]                  | -                                      | -                                          | -                                         |
| EF                                                      | -                            | -                              | -                                                  | -0.208 [0.015,<br>p<0.001]                 | -0.173 [0.014,<br>p<0.001 ]            | -0.207<br>[0.0149,<br>p<0.001]             | 0.0410 [0.017,<br>p<0.05]                 |
| COPD *EF                                                | -                            | -                              | -                                                  | <b>0.205 [0.036,</b><br><b>p&lt;0.001]</b> | -                                      | <b>0.195 [0.034,</b><br><b>p&lt;0.001]</b> | <b>0.096 [0.037,</b><br><b>p&lt;0.05]</b> |
| Asthma*EF                                               | -                            | -                              | -                                                  | <b>0.018 [0.058,</b><br><b>p=0.753]</b>    | <b>0.013 [0.05,</b><br><b>p=0.797]</b> | -                                          | -                                         |
| COPD*Asthma*EF                                          | -                            | -                              | -                                                  | <b>-0.093 [0.112,</b><br><b>p=0.402]</b>   | -                                      | -                                          | -                                         |
| Age                                                     | -                            | -                              | -                                                  | -                                          | -                                      | -                                          | 0.553 [0.0101,<br>p<0.001]                |
| Female (vs. male)                                       | -                            | -                              | -                                                  | -                                          | -                                      | -                                          | -0.0922 [0.0150,<br>p<0.001]              |

|                                                                                                                                                                                                                                                                                     |          |          |          |          |          |          |                           |
|-------------------------------------------------------------------------------------------------------------------------------------------------------------------------------------------------------------------------------------------------------------------------------------|----------|----------|----------|----------|----------|----------|---------------------------|
| Valve disease                                                                                                                                                                                                                                                                       | -        | -        | -        | -        | -        | -        | 0.219 [0.0169, p<0.001]   |
| IHD                                                                                                                                                                                                                                                                                 | -        | -        | -        | -        | -        | -        | 0.1204 [0.015, p<0.001]   |
| Hypertension                                                                                                                                                                                                                                                                        | -        | -        | -        | -        | -        | -        | -0.220 [0.0148, p<0.001]  |
| Diabetes                                                                                                                                                                                                                                                                            | -        | -        | -        | -        | -        | -        | 0.0489 [0.0164, p<0.01]   |
| AF                                                                                                                                                                                                                                                                                  | -        | -        | -        | -        | -        | -        | -0.0056 [0.0147, p=0.703] |
| NYHA                                                                                                                                                                                                                                                                                | -        | -        | -        | -        | -        | -        | 0.116 [0.018, p<0.001]    |
| Place of care (cardiology vs not cardiology)                                                                                                                                                                                                                                        | -        | -        | -        | -        | -        | -        | -0.363 [0.0168, p<0.001]  |
| <b>Random effects (hospitals, n=219)</b>                                                                                                                                                                                                                                            |          |          |          |          |          |          |                           |
| Variance                                                                                                                                                                                                                                                                            | 0.205    | 0.208    | 0.208    | 0.201    | 0.201    | 0.201    | 0.159                     |
| SD                                                                                                                                                                                                                                                                                  | 0.453    | 0.456    | 0.456    | 0.448    | 0.449    | 0.449    | 0.399                     |
| AIC                                                                                                                                                                                                                                                                                 | 160533.4 | 158837.1 | 158836.2 | 158652.0 | 158681.2 | 158649.7 | 133038.5                  |
| Abbreviations<br>AIC= Akaike information criterion; AF= atrial fibrillation; COPD= chronic obstructive pulmonary disease; CI=confidence intervals; EF= ejection fraction; NYHA= New York Heart Association; IHD= ischemic heart disease; SD= standard deviation; SE= standard error |          |          |          |          |          |          |                           |

Results from a 2-level unconditional model that included COPD as fixed-effect and hospital as random effect suggested COPD was associated with an increase in the estimate for in-hospital mortality. The addition of asthma to this model indicated it had an inverse relationship with likelihood of death. A test for the interaction between COPD and asthma was not significant, thus, it was not considered in subsequent analyses. Further, we wanted to assess whether the effects of COPD, respectively asthma on in-hospital death are different with respect to EF status group therefore, we added a three-way interaction between COPD, asthma and EF to the model. We detected a significant interaction between COPD and EF only, suggesting the effect of COPD only, not asthma would

1  
2  
3 be differential according to the EF status. In the final model, we estimated the association between COPD and mortality in HFrEF and  
4 in HFpEF and adjusted for baseline covariates.  
5  
6  
7  
8  
9  
10  
11  
12  
13  
14  
15  
16  
17  
18  
19  
20  
21  
22  
23  
24  
25  
26  
27  
28  
29  
30  
31  
32  
33  
34  
35  
36  
37  
38  
39  
40  
41  
42  
43  
44  
45  
46  
47

For peer review only



**Table 4.** Association between COPD, asthma and in-hospital death

| Predictors                                                                                                                                                           | COPD only (95% CI)        | COPD + asthma             | Fully adjusted model      | Model with COPD and EF interaction, fully adjusted OR (95% CI) |
|----------------------------------------------------------------------------------------------------------------------------------------------------------------------|---------------------------|---------------------------|---------------------------|----------------------------------------------------------------|
| <b>Fixed effects (95% CI)</b>                                                                                                                                        |                           |                           |                           | P-value for interaction =0.01                                  |
| COPD                                                                                                                                                                 | <b>1.07 (1.03 – 1.10)</b> | <b>1.07 (1.04-1.11)</b>   | <b>1.10 (1.06 – 1.14)</b> | 1.04 (0.99-1.10)                                               |
| Asthma                                                                                                                                                               | -                         | <b>0.77 (0.73 – 0.80)</b> | <b>0.84 (0.79, 0.88)</b>  | 0.83 (0.79-0.88)                                               |
| COPD (Yes vs. No): HFpEF                                                                                                                                             | -                         | -                         | -                         | <b>1.05 (0.99 – 1.10)</b>                                      |
| COPD (Yes vs. No): HFrEF                                                                                                                                             | -                         | -                         | -                         | <b>1.15 (1.09 – 1.21)</b>                                      |
| Age                                                                                                                                                                  | -                         |                           | 1.74 (1.71 -1.78)         | 1.74 (1.71-1.77)                                               |
| Female (vs. male)                                                                                                                                                    | -                         |                           | 0.91 (0.89-0.94)          | 0.91 (0.89-0.94)                                               |
| Valve disease                                                                                                                                                        | -                         |                           | 1.25 (1.20-1.29)          | 1.25 (1.20-1.29)                                               |
| IHD                                                                                                                                                                  | -                         |                           | 1.12 (1.10-1.16)          | 1.13 (1.10-1.16)                                               |
| Hypertension                                                                                                                                                         | -                         |                           | 0.8 (0.78-0.83)           | 0.80 (0.78-0.83)                                               |
| Diabetes                                                                                                                                                             | -                         |                           | 1.05 (1.02-1.08)          | 1.05 (1.02-1.08)                                               |
| AF                                                                                                                                                                   | -                         |                           | 0.99 (0.97-1.02)          | 0.99 (0.96-1.02)                                               |
| NYHA (III/IV vs. I/II)                                                                                                                                               | -                         |                           | 1.12 (1.08-1.17)          | 1.12 (1.08-1.17)                                               |
| Place of care (not cardiology vs. cardiology ward)                                                                                                                   | -                         |                           | 0.69 (0.67-0.72)          | 0.69 (0.67-0.71)                                               |
| <i>Random effects (Variance)</i>                                                                                                                                     |                           |                           |                           |                                                                |
| <i>LR test p-value</i>                                                                                                                                               | P<0.001                   | P<0.001                   | P<0.001                   | P<0.001                                                        |
| Likelihood ratio test comparing fixed to random effects for hospital model fit, significant indicates random effects model performed better than fixed effects model |                           |                           |                           |                                                                |
| Abbreviations                                                                                                                                                        |                           |                           |                           |                                                                |

1  
2  
3 AF= atrial fibrillation; COPD= chronic obstructive pulmonary disease; CI=confidence intervals; EF= ejection fraction; LR= Likelihood ratio test; NYHA= New  
4 York Heart Association; IHD= ischemic heart disease; SD= standard deviation.  
5  
6  
7  
8  
9

10  
11  
12  
13  
14  
15  
16  
17  
18  
19  
20  
21  
22  
23  
24  
25  
26  
27  
28  
29  
30  
31  
32  
33  
34  
35  
36  
37  
38  
39  
40  
41  
42  
43  
44  
45  
46  
47

For peer review only

**Table 5.** Association between COPD and in-hospital mortality in patients hospitalised with heart failure. Results from 20 models using imputed smoking status and BMI (estimates combined using Rubin's rule).

|                                                                                                                                                                                                                                                             | Fully adjusted model, OR (95% CI) |
|-------------------------------------------------------------------------------------------------------------------------------------------------------------------------------------------------------------------------------------------------------------|-----------------------------------|
| <b>Fixed effects (95% CI)</b>                                                                                                                                                                                                                               |                                   |
| COPD                                                                                                                                                                                                                                                        | 1.12 (1.07 – 1.17)                |
| Asthma                                                                                                                                                                                                                                                      | 0.84 (0.80 – 0.90)                |
| Age                                                                                                                                                                                                                                                         | 1.67 (1.62 – 1.71)                |
| Female (vs. male)                                                                                                                                                                                                                                           | 0.89 (0.86 – 0.92)                |
| Valve disease                                                                                                                                                                                                                                               | 1.22 (1.18 – 1.26)                |
| IHD                                                                                                                                                                                                                                                         | 1.13 (1.10 – 1.17)                |
| Hypertension                                                                                                                                                                                                                                                | 0.82 (0.89 – 0.85)                |
| Diabetes                                                                                                                                                                                                                                                    | 1.12 (1.08 – 1.15)                |
| AF                                                                                                                                                                                                                                                          | 1.01 (0.98 – 1.04)                |
| NYHA (III/IV vs. I/II)                                                                                                                                                                                                                                      | 1.15 (1.10 – 1.20)                |
| Place of care (cardiology vs. no cardiology ward)                                                                                                                                                                                                           | 0.70 (0.69 – 0.73)                |
| EF                                                                                                                                                                                                                                                          | 1.03 (0.99 – 1.06)                |
| <i>Smoking status (ref: Current smoker)</i>                                                                                                                                                                                                                 |                                   |
| Ex-smoker                                                                                                                                                                                                                                                   | 0.90 (0.77 – 1.06)                |
| Never                                                                                                                                                                                                                                                       | 1 (0.84 – 1.19)                   |
| <i>BMI (ref: normal weight)</i>                                                                                                                                                                                                                             |                                   |
| Underweight                                                                                                                                                                                                                                                 | 1.31 (1.21 – 1.43)                |
| Overweight                                                                                                                                                                                                                                                  | 0.86 (0.81 – 0.91)                |
| Obese                                                                                                                                                                                                                                                       | 0.77 (0.73 – 0.81)                |
| <i>Random effects (Variance)</i>                                                                                                                                                                                                                            |                                   |
| <i>LR test p-value</i>                                                                                                                                                                                                                                      | P<0.001                           |
| Abbreviations<br>AF= atrial fibrillation; BMI= Body Mass index; CI= confidence intervals; COPD= chronic obstructive pulmonary disease; EF= ejection fraction; IHD= ischemic heart disease; NYHA= New York Heart Association; OR= Odds ratio; ref= reference |                                   |

1  
2  
3  
4  
5  
6  
7  
8  
9  
10  
11  
12  
13  
14  
15  
16  
17  
18  
19  
20  
21  
22  
23  
24  
25  
26  
27  
28  
29  
30  
31  
32  
33  
34  
35  
36  
37  
38  
39  
40  
41  
42  
43  
44  
45  
46  
47

**Table 6.** Association between COPD and in-hospital mortality in patients hospitalised with a confirmed diagnosis of HF.

|                                                                                                                                                                                                                                                                                        | Fully adjusted model, OR (95% CI) |
|----------------------------------------------------------------------------------------------------------------------------------------------------------------------------------------------------------------------------------------------------------------------------------------|-----------------------------------|
| <b>Fixed effects (95% CI)</b>                                                                                                                                                                                                                                                          |                                   |
| COPD                                                                                                                                                                                                                                                                                   | 1.11 (1.07 - 1.16)                |
| Asthma                                                                                                                                                                                                                                                                                 | 0.84 (0.79 - 0.89)                |
| Age                                                                                                                                                                                                                                                                                    | 1.04 (1.04 - 1.05)                |
| Female (vs. male)                                                                                                                                                                                                                                                                      | 0.91 (0.88 - 0.94)                |
| Valve disease                                                                                                                                                                                                                                                                          | 1.26 (1.22 - 1.30)                |
| IHD                                                                                                                                                                                                                                                                                    | 1.15 (1.11 - 1.18)                |
| Hypertension                                                                                                                                                                                                                                                                           | 0.81 (0.79 - 0.84)                |
| Diabetes                                                                                                                                                                                                                                                                               | 1.06 (1.03 - 1.10)                |
| AF                                                                                                                                                                                                                                                                                     | 0.98 (0.95 - 1.01)                |
| NYHA (III/IV vs. I/II)                                                                                                                                                                                                                                                                 | 1.13 (1.08 - 1.18)                |
| Place of care (cardiology vs. no cardiology ward)                                                                                                                                                                                                                                      | 0.69 (0.66 - 0.71)                |
| EF                                                                                                                                                                                                                                                                                     | 1.04 (1.01 - 1.08)                |
| <i>Random effects (Variance)</i>                                                                                                                                                                                                                                                       | 0.166                             |
| <i>LR test p-value</i>                                                                                                                                                                                                                                                                 | p<0.001                           |
| Abbreviations<br>AF= atrial fibrillation; BMI= Body Mass index; CI= confidence intervals; COPD= chronic obstructive pulmonary disease; EF= ejection fraction; IHD= ischemic heart disease; LR= Likelihood ratio test; NYHA= New York Heart Association; OR= Odds ratio; ref= reference |                                   |

**Table 7.** Variables with considerable missingness in the National Heart Failure Audit 2012-2018

|                                       | <b>HF alone<br/>(N=170297)</b> | <b>COPD + HF<br/>(N=32695)</b> | <b>Asthma + HF<br/>(N=14400)</b> | <b>Overall<br/>(N=217392)</b> |
|---------------------------------------|--------------------------------|--------------------------------|----------------------------------|-------------------------------|
| <b>Cerebrovascular accident</b>       | 2882 (1.7%)                    | 582 (1.8%)                     | 244 (1.7%)                       | 3708 (1.7%)                   |
| Missing                               | 145636 (85.5%)                 | 28115 (86.0%)                  | 12279 (85.3%)                    | 186030 (85.6%)                |
| <b>Alcohol units/week</b>             |                                |                                |                                  |                               |
| Median [Q1, Q3]                       | 0 [0, 1.00]                    | 0 [0, 2.00]                    | 0 [0, 0]                         | 0 [0, 1.00]                   |
| Missing                               | 159233 (93.5%)                 | 30570 (93.5%)                  | 13314 (92.5%)                    | 203117 (93.4%)                |
| <b>Smoking status</b>                 |                                |                                |                                  |                               |
| Current smoker                        | 1869 (1.1%)                    | 911 (2.8%)                     | 143 (1.0%)                       | 2923 (1.3%)                   |
| Ex-smoker                             | 8371 (4.9%)                    | 2505 (7.7%)                    | 715 (5.0%)                       | 11591 (5.3%)                  |
| Never-smoker                          | 8823 (5.2%)                    | 673 (2.1%)                     | 896 (6.2%)                       | 10392 (4.8%)                  |
| Missing                               | 151234 (88.8%)                 | 28606 (87.5%)                  | 12646 (87.8%)                    | 192486 (88.5%)                |
| <b>Chest X-ray (pulmonary oedema)</b> | 3954 (2.3%)                    | 692 (2.1%)                     | 334 (2.3%)                       | 4980 (2.3%)                   |
| Missing                               | 157253 (92.3%)                 | 30528 (93.4%)                  | 13311 (92.4%)                    | 201092 (92.5%)                |
| <b>Medications at admission</b>       |                                |                                |                                  |                               |
| <b>ACEi</b>                           | 6316 (3.7%)                    | 1116 (3.4%)                    | 513 (3.6%)                       | 7945 (3.7%)                   |
| Contraindicated                       | 592 (0.3%)                     | 140 (0.4%)                     | 59 (0.4%)                        | 791 (0.4%)                    |
| Missing                               | 152642 (89.6%)                 | 29598 (90.5%)                  | 12903 (89.6%)                    | 195143 (89.8%)                |
| <b>ARB</b>                            | 2392 (1.4%)                    | 453 (1.4%)                     | 305 (2.1%)                       | 3150 (1.4%)                   |
| Not applicable                        | 2570 (1.5%)                    | 513 (1.6%)                     | 240 (1.7%)                       | 3323 (1.5%)                   |
| Stopped                               | 0 (0%)                         | 0 (0%)                         | 0 (0%)                           | 0 (0%)                        |
| Contraindicated                       | 338 (0.2%)                     | 88 (0.3%)                      | 32 (0.2%)                        | 458 (0.2%)                    |
| Missing                               | 151870 (89.2%)                 | 29463 (90.1%)                  | 12781 (88.8%)                    | 194114 (89.3%)                |
| <b>Beta-blocker</b>                   | 9516 (5.6%)                    | 1446 (4.4%)                    | 598 (4.2%)                       | 11560 (5.3%)                  |
| Not applicable                        | 762 (0.4%)                     | 144 (0.4%)                     | 88 (0.6%)                        | 994 (0.5%)                    |
| Contraindicated                       | 153 (0.1%)                     | 136 (0.4%)                     | 74 (0.5%)                        | 363 (0.2%)                    |
| Missing                               | 151820 (89.2%)                 | 29481 (90.2%)                  | 12831 (89.1%)                    | 194132 (89.3%)                |
| <b>Loop diuretic</b>                  | 5519 (3.2%)                    | 1202 (3.7%)                    | 490 (3.4%)                       | 7211 (3.3%)                   |

|                                                                                                                                                                                                                                 |                   |                   |                   |                   |
|---------------------------------------------------------------------------------------------------------------------------------------------------------------------------------------------------------------------------------|-------------------|-------------------|-------------------|-------------------|
| Missing                                                                                                                                                                                                                         | 160255 (94.1%)    | 30820 (94.3%)     | 13532 (94.0%)     | 204607 (94.1%)    |
| <b>Thiazide or Metolazone</b>                                                                                                                                                                                                   | 925 (0.5%)        | 140 (0.4%)        | 81 (0.6%)         | 1146 (0.5%)       |
| Stopped*                                                                                                                                                                                                                        | -                 | -                 | -                 | -                 |
| Missing                                                                                                                                                                                                                         | 152559 (89.6%)    | 29604 (90.5%)     | 12891 (89.5%)     | 195054 (89.7%)    |
| <b>MRA</b>                                                                                                                                                                                                                      | 2356 (1.4%)       | 502 (1.5%)        | 221 (1.5%)        | 3079 (1.4%)       |
| Not applicable                                                                                                                                                                                                                  | 225 (0.1%)        | 45 (0.1%)         | 27 (0.2%)         | 297 (0.1%)        |
| Contraindicated                                                                                                                                                                                                                 | 36 (0.0%)         | *                 | *                 | 42 (0.0%)         |
| Missing                                                                                                                                                                                                                         | 152494 (89.5%)    | 29570 (90.4%)     | 12885 (89.5%)     | 194949 (89.7%)    |
| <b>Digoxin</b>                                                                                                                                                                                                                  | 1700 (1.0%)       | 399 (1.2%)        | 168 (1.2%)        | 2267 (1.0%)       |
| Missing                                                                                                                                                                                                                         | 152631 (89.6%)    | 29622 (90.6%)     | 12874 (89.4%)     | 195127 (89.8%)    |
| CCB                                                                                                                                                                                                                             | 2847 (1.7%)       | 479 (1.5%)        | 280 (1.9%)        | 3606 (1.7%)       |
| Missing                                                                                                                                                                                                                         | 155279 (91.2%)    | 30261 (92.6%)     | 13150 (91.3%)     | 198690 (91.4%)    |
| <b>Bronchodilators</b>                                                                                                                                                                                                          | 919 (0.5%)        | 1390 (4.3%)       | 750 (5.2%)        | 3059 (1.4%)       |
| Missing                                                                                                                                                                                                                         | 155316 (91.2%)    | 30248 (92.5%)     | 13136 (91.2%)     | 198700 (91.4%)    |
| <b>Ivabradine</b>                                                                                                                                                                                                               | 186 (0.1%)        | 64 (0.2%)         | 31 (0.2%)         | 281 (0.1%)        |
| Missing                                                                                                                                                                                                                         | 153320 (90%)      | 29666 (90.7%)     | 12845 (89.2%)     | 195831 (90.1%)    |
| <b>BMI</b>                                                                                                                                                                                                                      |                   |                   |                   |                   |
| Median [Q1, Q3]                                                                                                                                                                                                                 | 26.5 [22.9, 31.1] | 27.1 [22.8, 32.2] | 28.0 [23.6, 33.7] | 26.7 [22.9, 31.4] |
| Missing                                                                                                                                                                                                                         | 125287 (73.6%)    | 23693 (72.5%)     | 10274 (71.3%)     | 159254 (73.3%)    |
| <b>BNP</b>                                                                                                                                                                                                                      |                   |                   |                   |                   |
| Median [Q1, Q3]                                                                                                                                                                                                                 | 428 [1.00, 1100]  | 350 [1.00, 985]   | 353 [1.00, 871]   | 412 [1.00, 1070]  |
| Missing                                                                                                                                                                                                                         | 153043 (89.9%)    | 29385 (89.9%)     | 12978 (90.1%)     | 195406 (89.9%)    |
| <b>NT_proBNP</b>                                                                                                                                                                                                                |                   |                   |                   |                   |
| Median [Q1, Q3]                                                                                                                                                                                                                 | 2790 [404, 7530]  | 2490 [349, 6820]  | 2440 [426, 6330]  | 2700 [393, 7320]  |
| Missing                                                                                                                                                                                                                         | 153022 (89.9%)    | 29161 (89.2%)     | 12818 (89.0%)     | 195001 (89.7%)    |
| *not shown due to small numbers policy                                                                                                                                                                                          |                   |                   |                   |                   |
| ACEi= angiotensin-converting-enzyme inhibitors; ARB= angiotensin receptor blockers; BMI= Body mass index; BNP= brain natriuretic peptide; NT_proBNP= N-terminal (NT)-pro hormone BNP; MRA=mineralocorticoid receptor antagonist |                   |                   |                   |                   |

**Figure 1.** Study flow

HF= heart failure; COPD=chronic obstructive pulmonary disease



**Supplemental references**

1. Shoaib A, Mamas MA, Ahmad QS, et al. Characteristics and outcome of acute heart failure patients according to the severity of peripheral oedema. *Int J Cardiol* 2019;285:40-46. doi: 10.1016/j.ijcard.2019.03.020 [published Online First: 2019/03/25]
2. Conrad N, Judge A, Tran J, et al. Temporal trends and patterns in heart failure incidence: a population-based study of 4 million individuals. *The Lancet* 2018;391(10120):572-80. doi: 10.1016/s0140-6736(17)32520-5
3. Lawson CA, Mamas MA, Jones PW, et al. Association of Medication Intensity and Stages of Airflow Limitation With the Risk of Hospitalization or Death in Patients With Heart Failure and Chronic Obstructive Pulmonary Disease. *JAMA Netw Open* 2018;1(8):e185489. doi: 10.1001/jamanetworkopen.2018.5489 [published Online First: 2019/01/16]
4. Quartagno M, Grund S, and Carpenter J. Jomo: a flexible package for two-level joint modelling multiple imputation. *R Journal* 2019;9.1



**STROBE 2007 (v4) checklist of items to be included in reports of observational studies in epidemiology\***  
**Checklist for cohort, case-control, and cross-sectional studies (combined)**

| Section/Topic             | Item # | Recommendation                                                                                                                                                                                                                                                                                                                                                                                                                                                         | Reported on page #  |
|---------------------------|--------|------------------------------------------------------------------------------------------------------------------------------------------------------------------------------------------------------------------------------------------------------------------------------------------------------------------------------------------------------------------------------------------------------------------------------------------------------------------------|---------------------|
| Title and abstract        | 1      | (a) Indicate the study's design with a commonly used term in the title or the abstract                                                                                                                                                                                                                                                                                                                                                                                 | 3                   |
|                           |        | (b) Provide in the abstract an informative and balanced summary of what was done and what was found                                                                                                                                                                                                                                                                                                                                                                    | 2,3                 |
| <b>Introduction</b>       |        |                                                                                                                                                                                                                                                                                                                                                                                                                                                                        |                     |
| Background/rationale      | 2      | Explain the scientific background and rationale for the investigation being reported                                                                                                                                                                                                                                                                                                                                                                                   | 5,6                 |
| Objectives                | 3      | State specific objectives, including any pre-specified hypotheses                                                                                                                                                                                                                                                                                                                                                                                                      | 5,6                 |
| <b>Methods</b>            |        |                                                                                                                                                                                                                                                                                                                                                                                                                                                                        |                     |
| Study design              | 4      | Present key elements of study design early in the paper                                                                                                                                                                                                                                                                                                                                                                                                                | 6                   |
| Setting                   | 5      | Describe the setting, locations, and relevant dates, including periods of recruitment, exposure, follow-up, and data collection                                                                                                                                                                                                                                                                                                                                        | 6, 7, Supplement    |
| Participants              | 6      | (a) <i>Cohort study</i> —Give the eligibility criteria, and the sources and methods of selection of participants. Describe methods of follow-up<br><i>Case-control study</i> —Give the eligibility criteria, and the sources and methods of case ascertainment and control selection. Give the rationale for the choice of cases and controls<br><i>Cross-sectional study</i> —Give the eligibility criteria, and the sources and methods of selection of participants | 6, 7, Supplement    |
|                           |        | (b) <i>Cohort study</i> —For matched studies, give matching criteria and number of exposed and unexposed<br><i>Case-control study</i> —For matched studies, give matching criteria and the number of controls per case                                                                                                                                                                                                                                                 |                     |
| Variables                 | 7      | Clearly define all outcomes, exposures, predictors, potential confounders, and effect modifiers. Give diagnostic criteria, if applicable                                                                                                                                                                                                                                                                                                                               | 7, 8, Supplement    |
| Data sources/ measurement | 8*     | For each variable of interest, give sources of data and details of methods of assessment (measurement). Describe comparability of assessment methods if there is more than one group                                                                                                                                                                                                                                                                                   | 6, 7, Supplement    |
| Bias                      | 9      | Describe any efforts to address potential sources of bias                                                                                                                                                                                                                                                                                                                                                                                                              | 7, 8, 9, Supplement |
| Study size                | 10     | Explain how the study size was arrived at                                                                                                                                                                                                                                                                                                                                                                                                                              |                     |
| Quantitative variables    | 11     | Explain how quantitative variables were handled in the analyses. If applicable, describe which groupings were chosen and why                                                                                                                                                                                                                                                                                                                                           | 8, 9                |
| Statistical methods       | 12     | (a) Describe all statistical methods, including those used to control for confounding                                                                                                                                                                                                                                                                                                                                                                                  | 8,9, Supplement     |
|                           |        | (b) Describe any methods used to examine subgroups and interactions                                                                                                                                                                                                                                                                                                                                                                                                    | 8,9, Supplement     |
|                           |        | (c) Explain how missing data were addressed                                                                                                                                                                                                                                                                                                                                                                                                                            | 9, Supplement       |
|                           |        | (d) <i>Cohort study</i> —If applicable, explain how loss to follow-up was addressed<br><i>Case-control study</i> —If applicable, explain how matching of cases and controls was addressed                                                                                                                                                                                                                                                                              | 6                   |

|                          |     |                                                                                                                                                                                                              |                          |
|--------------------------|-----|--------------------------------------------------------------------------------------------------------------------------------------------------------------------------------------------------------------|--------------------------|
|                          |     | <i>Cross-sectional study</i> —If applicable, describe analytical methods taking account of sampling strategy                                                                                                 |                          |
|                          |     | (e) Describe any sensitivity analyses                                                                                                                                                                        | 9, Supplement            |
| <b>Results</b>           |     |                                                                                                                                                                                                              |                          |
| Participants             | 13* | (a) Report numbers of individuals at each stage of study—eg numbers potentially eligible, examined for eligibility, confirmed eligible, included in the study, completing follow-up, and analysed            | 6, Supplement flow chart |
|                          |     | (b) Give reasons for non-participation at each stage                                                                                                                                                         | Supplement flow chart    |
|                          |     | (c) Consider use of a flow diagram                                                                                                                                                                           | Supplement flow chart    |
| Descriptive data         | 14* | (a) Give characteristics of study participants (eg demographic, clinical, social) and information on exposures and potential confounders                                                                     | 9, 10                    |
|                          |     | (b) Indicate number of participants with missing data for each variable of interest                                                                                                                          | 20-22, Supplement        |
|                          |     | (c) <i>Cohort study</i> —Summarise follow-up time (eg, average and total amount)                                                                                                                             |                          |
| Outcome data             | 15* | <i>Cohort study</i> —Report numbers of outcome events or summary measures over time                                                                                                                          |                          |
|                          |     | <i>Case-control study</i> —Report numbers in each exposure category, or summary measures of exposure                                                                                                         |                          |
|                          |     | <i>Cross-sectional study</i> —Report numbers of outcome events or summary measures                                                                                                                           | 10-12                    |
| Main results             | 16  | (a) Give unadjusted estimates and, if applicable, confounder-adjusted estimates and their precision (eg, 95% confidence interval). Make clear which confounders were adjusted for and why they were included | 23, Supplement           |
|                          |     | (b) Report category boundaries when continuous variables were categorized                                                                                                                                    | 9, 20-22                 |
|                          |     | (c) If relevant, consider translating estimates of relative risk into absolute risk for a meaningful time period                                                                                             |                          |
| Other analyses           | 17  | Report other analyses done—eg analyses of subgroups and interactions, and sensitivity analyses                                                                                                               | 10, Supplement           |
| <b>Discussion</b>        |     |                                                                                                                                                                                                              |                          |
| Key results              | 18  | Summarise key results with reference to study objectives                                                                                                                                                     | 12-16                    |
| Limitations              | 19  | Discuss limitations of the study, taking into account sources of potential bias or imprecision. Discuss both direction and magnitude of any potential bias                                                   | 17                       |
| Interpretation           | 20  | Give a cautious overall interpretation of results considering objectives, limitations, multiplicity of analyses, results from similar studies, and other relevant evidence                                   | 18                       |
| Generalisability         | 21  | Discuss the generalisability (external validity) of the study results                                                                                                                                        | 18                       |
| <b>Other information</b> |     |                                                                                                                                                                                                              |                          |
| Funding                  | 22  | Give the source of funding and the role of the funders for the present study and, if applicable, for the original study on which the present article is based                                                | 19                       |

\*Give information separately for cases and controls in case-control studies and, if applicable, for exposed and unexposed groups in cohort and cross-sectional studies.

1  
2 **Note:** An Explanation and Elaboration article discusses each checklist item and gives methodological background and published examples of transparent reporting. The STROBE  
3 checklist is best used in conjunction with this article (freely available on the Web sites of PLoS Medicine at <http://www.plosmedicine.org/>, Annals of Internal Medicine at  
4 <http://www.annals.org/>, and Epidemiology at <http://www.epidem.com/>). Information on the STROBE Initiative is available at [www.strobe-statement.org](http://www.strobe-statement.org).  
5  
6  
7  
8  
9  
10  
11  
12  
13  
14  
15  
16  
17  
18  
19  
20  
21  
22  
23  
24  
25  
26  
27  
28  
29  
30  
31  
32  
33  
34  
35  
36  
37  
38  
39  
40  
41  
42  
43  
44  
45  
46

For peer review only

# BMJ Open

## Impact of COPD and asthma on in-hospital mortality and management of patients with heart failure in England and Wales: an observational analysis

|                                 |                                                                                                                                                                                                                                                                                                                                                                          |
|---------------------------------|--------------------------------------------------------------------------------------------------------------------------------------------------------------------------------------------------------------------------------------------------------------------------------------------------------------------------------------------------------------------------|
| Journal:                        | <i>BMJ Open</i>                                                                                                                                                                                                                                                                                                                                                          |
| Manuscript ID                   | bmjopen-2021-059122.R2                                                                                                                                                                                                                                                                                                                                                   |
| Article Type:                   | Original research                                                                                                                                                                                                                                                                                                                                                        |
| Date Submitted by the Author:   | 03-Jun-2022                                                                                                                                                                                                                                                                                                                                                              |
| Complete List of Authors:       | Gulea, Claudia; Imperial College London; NIHR Imperial Biomedical Research Centre<br>Zakeri, Rosita; King's College London<br>Kallis, Constantinos; Imperial College London; NIHR Imperial Biomedical Research Centre<br>Quint, Jennifer; Imperial College London, Respiratory Epidemiology, Occupational Medicine and Public Health; National Heart and Lung Institute; |
| <b>Primary Subject Heading</b>: | Cardiovascular medicine                                                                                                                                                                                                                                                                                                                                                  |
| Secondary Subject Heading:      | Epidemiology, Respiratory medicine                                                                                                                                                                                                                                                                                                                                       |
| Keywords:                       | Heart failure < CARDIOLOGY, EPIDEMIOLOGY, RESPIRATORY MEDICINE (see Thoracic Medicine)                                                                                                                                                                                                                                                                                   |
|                                 |                                                                                                                                                                                                                                                                                                                                                                          |

SCHOLARONE™  
Manuscripts

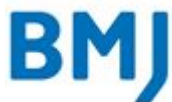

I, the Submitting Author has the right to grant and does grant on behalf of all authors of the Work (as defined in the below author licence), an exclusive licence and/or a non-exclusive licence for contributions from authors who are: i) UK Crown employees; ii) where BMJ has agreed a CC-BY licence shall apply, and/or iii) in accordance with the terms applicable for US Federal Government officers or employees acting as part of their official duties; on a worldwide, perpetual, irrevocable, royalty-free basis to BMJ Publishing Group Ltd ("BMJ") its licensees and where the relevant Journal is co-owned by BMJ to the co-owners of the Journal, to publish the Work in this journal and any other BMJ products and to exploit all rights, as set out in our [licence](#).

The Submitting Author accepts and understands that any supply made under these terms is made by BMJ to the Submitting Author unless you are acting as an employee on behalf of your employer or a postgraduate student of an affiliated institution which is paying any applicable article publishing charge ("APC") for Open Access articles. Where the Submitting Author wishes to make the Work available on an Open Access basis (and intends to pay the relevant APC), the terms of reuse of such Open Access shall be governed by a Creative Commons licence – details of these licences and which [Creative Commons](#) licence will apply to this Work are set out in our licence referred to above.

Other than as permitted in any relevant BMJ Author's Self Archiving Policies, I confirm this Work has not been accepted for publication elsewhere, is not being considered for publication elsewhere and does not duplicate material already published. I confirm all authors consent to publication of this Work and authorise the granting of this licence.

1  
2  
3 **Title:** Impact of COPD and asthma on in-hospital mortality and management of patients with  
4 heart failure in England and Wales: an observational analysis  
5  
6  
7

8 **Authors:** Claudia Gulea<sup>1, 2</sup>, Rosita Zakeri<sup>3</sup>, Constantinos Kallis<sup>1, 2</sup>, Jennifer K. Quint<sup>1, 2</sup>  
9  
10  
11  
12  
13

#### 14 **Affiliations**

15  
16  
17 <sup>1</sup> National Heart and Lung Institute, Imperial College London, UK  
18  
19

20 <sup>2</sup> NIHR Imperial Biomedical Research Centre  
21  
22

23 <sup>3</sup> British Heart Foundation Centre for Research Excellence, King's College London, UK  
24  
25  
26  
27

28 **Corresponding author:** Claudia Gulea  
29  
30

31 Email address: [c.gulea18@imperial.ac.uk](mailto:c.gulea18@imperial.ac.uk)  
32  
33

34 Address: G05, Emmanuel Kaye Building, 1B Manresa Road, National  
35 Heart and Lung Institute, Imperial College London, United Kingdom  
36  
37

38 Telephone: +44 (0) 20 7594 7987  
39  
40  
41  
42  
43  
44  
45  
46  
47

48 **Word count:** 3,199  
49  
50  
51  
52  
53  
54  
55  
56  
57

## Abstract

**Objective:** To evaluate the association between having concomitant COPD or asthma, and in-patient mortality and post-discharge management among patients hospitalised for acute HF.

**Setting:** Data were obtained from patients enrolled in the National Heart Failure Audit.

**Participants:** 217,329 patients hospitalised for HF in England-Wales between March 2012 and 2018.

**Outcomes:** In-hospital mortality, referrals to cardiology follow-up and prescriptions for HF medications were compared between patients with comorbid COPD (COPD-HF) or asthma (asthma-HF) versus HF-alone using mixed-effects logistic regression.

**Results:** Patients with COPD-HF were more likely to die during hospitalisation, and those with asthma-HF had a reduced likelihood of death, compared with patients who had HF-alone ([adjusted]OR<sub>adj</sub>, 95% CI: 1.10, 1.06-1.14 and OR<sub>adj</sub>, 95%CI: 0.85, 0.79-0.88). In patients who survived to discharge, referral to HF follow-up services differed between groups: COPD-HF patients had reduced odds of cardiology follow-up (OR<sub>adj</sub>, 95%CI 0.79, 0.77-0.81), whilst cardiology referral odds for asthma-HF were similar to HF-alone. Overall, proportions of HF medication prescriptions at discharge were low for both COPD-HF and asthma-HF groups, particularly prescriptions for beta-blockers.

**Conclusions:** In this nationwide analysis, we showed that COPD and asthma significantly impact the clinical course in patients hospitalised for HF. COPD is associated with higher in-patient mortality and lower cardiology referral odds, whilst COPD and asthma are both associated with lower use of prognostic HF therapies on discharge. These data highlight therapeutic gaps and a

1  
2  
3 need for better integration of cardiopulmonary services to improve healthcare provision for  
4  
5 patients with HF and coexisting respiratory disease.  
6  
7

8  
9 **Keywords:** heart failure, chronic obstructive pulmonary disease, asthma  
10  
11  
12  
13  
14  
15  
16  
17  
18  
19  
20  
21  
22  
23  
24  
25  
26  
27  
28  
29  
30  
31  
32  
33  
34  
35  
36  
37  
38  
39  
40  
41  
42  
43  
44  
45  
46  
47  
48  
49  
50  
51  
52  
53  
54  
55  
56  
57  
58  
59  
60

For peer review only



### Strengths and limitations

- This study evaluates the association between respiratory disease and in-hospital mortality and management outcomes in patients hospitalized with HF in a representative population from England and Wales.
- HF diagnosis was based either on diagnostic tests or clinical investigations which limited misclassification bias
- HF with preserved ejection fraction was an exclusion diagnosis (i.e., defined as HF in patients who did not have reduced ejection fraction) due to lack of information regarding specific diagnostic tests to confirm preserved ejection fraction status.
- There was a large proportion of missing data regarding bronchodilators and inhaled corticosteroids prescriptions which prevented evaluation of their impact on outcomes.

## Introduction

COPD and asthma frequently coexist with HF and are independently associated with mortality and increased healthcare use<sup>1 2</sup>. This has been explained by shared systemic inflammation, worsened by the presence of pulmonary disease as well as sub-optimal HF management<sup>3</sup>.

Evidence suggests that patients with HF and comorbid COPD are less likely to receive guideline recommended treatment for their HF. For example, beta-blockers which are used in the management of HF with reduced ejection fraction (HFrEF) are often not prescribed to patients with COPD, due to fear of bronchoconstriction<sup>4</sup>, reduced effectiveness of emergency beta-agonist medication or difficulty in discriminating between COPD and asthma<sup>5</sup>.

Less data exist on the relationship between asthma and HF. Some studies have shown that asthma is associated with an increased occurrence of cardiovascular disease whilst others suggest this is limited to women or smokers<sup>6</sup> and depends on age of asthma-onset<sup>7</sup>. This is further complicated by a component of chronic irreversible airflow obstruction in some people with long standing asthma, associated with a reduced response to asthma therapy<sup>8</sup>. This may, in turn, affect treatment choices in this group of patients and increase vulnerability to adverse events, versus either disease occurring alone. Meta-analyses and observational studies have suggested the use of beta-agonists or inhaled corticosteroids in both COPD and asthma has been associated with HF-onset, HF-related hospitalisation and increase in cardiovascular events<sup>9-11</sup>, which depend on disease severity and study setting, but nevertheless worsen prognosis<sup>1 7</sup>.

Our main aim was to compare in-hospital mortality and post-discharge HF management (referrals to HF services, discharge medication) among patients admitted to hospital with

1  
2  
3 decompensated HF, with and without COPD or asthma in a sample of patients from the  
4  
5 National Heart Failure Audit (NHFA) from England and Wales. We also investigated whether  
6  
7 ejection fraction (EF) status affects outcomes in these patient groups.  
8  
9

## 10 **Methods**

11  
12  
13 We included patients older than 18 years of age admitted to hospital for HF between March  
14  
15 2012 to April 2018 whose data were submitted to the NHFA. We considered their first HF  
16  
17 hospitalisation only (**Supplemental Methods, Supplemental Table 1**).  
18  
19

## 20 **Exposures**

21  
22  
23 **COPD** was defined as having a history of COPD - chronic bronchitis and/or emphysema,  
24  
25 confirmed by spirometry or beta agonist/steroid inhaler use.  
26  
27

28  
29 **Asthma** was defined as having a history of childhood asthma and atopy or having an asthma  
30  
31 diagnosis confirmed by a respiratory physician.  
32  
33

34  
35 No diagnostic test results were provided for COPD or asthma (**Supplemental Table 2**), and for  
36  
37 the purposes of this work were based on being recorded as “yes” (present) or “no” (absent) in  
38  
39 the audit data as defined above.  
40  
41

42  
43 **EF status** was defined as HFrEF and HF with preserved EF (HFpEF), determined through  
44  
45 echocardiography, MRI, nuclear scan, or angiogram. Those with an EF <40% were categorised  
46  
47 HFrEF. Due to a lack of information regarding specific diagnostic tests required to make a HFpEF  
48  
49 diagnosis, we determined HFpEF as patients not categorised as HFrEF<sup>12</sup>.  
50  
51  
52  
53  
54  
55  
56  
57  
58  
59  
60

1  
2  
3 **Covariates** were age, sex, New York Heart Association [NYHA] classification and place of care  
4  
5 (cardiology ward vs. other place of care [i.e., general ward]) and comorbidities (atrial fibrillation  
6  
7 [AF], ischemic heart disease [IHD], diabetes, valve disease, hypertension [**Supplementary Table**  
8  
9 **2**]).

### 13 **Outcomes**

14  
15  
16 Our primary outcome was in-hospital death during the index event (HF admission), defined as a  
17  
18 dichotomised variable (died/alive at discharge), according to COPD or asthma status. Secondary  
19  
20 analyses included post-discharge referral to HF services (cardiology, HF nurse, HF MDT  
21  
22 [multidisciplinary team]) and prescriptions for HF medications at discharge in those with HF<sub>rEF</sub>.  
23  
24  
25  
26

### 27 **Statistical analysis**

28  
29  
30 Differences in baseline characteristics between patients with COPD-HF/Asthma-HF and HF  
31  
32 alone are presented using percentages for categorical variables and medians and interquartile  
33  
34 ranges [IQR] for continuous variables. We assessed differences between groups using chi-  
35  
36 square and Kruskal-Wallis tests. We assessed differences in outcomes between patients with  
37  
38 COPD-HF compared with HF alone and between asthma-HF compared with HF-alone using  
39  
40 multilevel logistic regression with a random effect for hospital, to calculate odds ratios (OR) and  
41  
42 95% confidence intervals (CI) (**Supplemental Methods**). In the main analysis, we adjusted for  
43  
44 confounders with less than 20% missing data: age, sex, comorbidities, place of care and NYHA  
45  
46 status. The model building process is presented in **Supplementary Table 3**. Analyses of referrals  
47  
48 were conducted similarly and excluded patients who died in-hospital. Associations between  
49  
50 COPD or asthma and HF medication prescriptions at discharge (beta blockers, angiotensin-  
51  
52  
53  
54  
55  
56  
57  
58  
59  
60

1  
2  
3 converting-enzyme inhibitors [ACEis], angiotensin receptor blockers [ARBs] and  
4  
5 mineralocorticoid receptor antagonists [MRAs]) excluded those with HFpEF.  
6  
7

### 8 9 **Sensitivity analyses**

10  
11 Due to potential confounding, smoking and Body Mass Index (BMI) were multiply imputed  
12  
13 using a multilevel approach (**Supplemental methods**). We also repeated the main analysis in a  
14  
15 cohort of patients including only a “confirmed HF diagnosis” (ICD-10 HF diagnosis confirmed by  
16  
17 imaging/BNP testing, or adjudicated by a clinician in the absence of echocardiography)<sup>13</sup>.  
18  
19

20  
21  
22 Analyses were performed with R v4.0.3.  
23  
24

### 25 26 **Results**

27  
28 Baseline characteristics are presented in **Table 1**. In total, 217,329 patients were admitted to  
29  
30 hospital in England-Wales due to decompensated HF between 2012 and 2018, with data on  
31  
32 COPD/asthma status available (**Supplemental Figure 1**). The median age was 81 years (IQR 72-  
33  
34 87) and 53.7% were male. In-hospital death occurred in 12% of patients. COPD was diagnosed  
35  
36 in 15% of patients and asthma in 6.6%. Most patients were characterised by either marked or  
37  
38 severe breathlessness and half had a recorded HF management plan in place at discharge.  
39  
40

41  
42 Length of stay and deprivation ranking did not differ significantly between patients with COPD-  
43  
44 HF, asthma-HF and HF alone. COPD-HF patients were mostly male, were less often admitted to  
45  
46 cardiology and were more frequently diagnosed with IHD compared with those with HF alone;  
47  
48 hypertension was slightly less common among COPD-HF patients, whereas diabetes was more  
49  
50 common. The proportion of patients with HFpEF was marginally higher in the COPD-HF group,  
51  
52 compared with the HF-only group. Asthma-HF patients were mostly female, with higher levels  
53  
54  
55  
56  
57

1  
2  
3 of diabetes and hypertension compared to HF-only. Conversely, AF was less common in the  
4  
5 asthma-HF compared with the HF-alone group; there were also more patients with HFpEF.  
6  
7

### 8 *In-hospital death*

9  
10  
11 The association between COPD and in-hospital death, is presented in **Figure 1, Table 2, and**  
12  
13 **Supplementary Table 4.** Overall, COPD was independently associated with increased odds of in-  
14  
15 hospital death ([adjusted]OR<sub>adj</sub>, 95% CI: 1.10, 1.06-1.14). The relationship between COPD and  
16  
17 in-hospital death differed according to EF: COPD was associated with an increase in mortality in  
18  
19 patients with HFrEF (OR<sub>adj</sub>: 1.15, 1.09 – 1.21), but not in those with HFpEF (OR<sub>adj</sub>: 1.05, 0.99–  
20  
21 1.10).  
22  
23  
24  
25

26  
27 Conversely, asthma was associated with a decrease in the odds of in-hospital death compared  
28  
29 with HF patients without asthma (OR<sub>adj</sub>, 95%CI: 0.85, 0.79-0.88). The odds of death did not vary  
30  
31 by EF status for patients with asthma-HF (**Figure 1, Table 2**).  
32  
33  
34

35 Sensitivity analyses where smoking status and BMI were imputed due to missing data  
36  
37 (**Supplementary Table 5**), and where patients with a confirmed HF diagnosis only were included  
38  
39 (**Supplementary Table 6**), showed similar results to the main analysis.  
40  
41  
42

### 43 *Referrals to HF services*

44  
45  
46 In the fully adjusted models, COPD was associated with decreased likelihood of outpatient  
47  
48 referral to a cardiologist (OR<sub>adj</sub>, 95%CI 0.79, 0.77-0.81) and to a HF-MDT (OR<sub>adj</sub>, 95% CI 0.94,  
49  
50 0.91-0.97). Patients with COPD-HFrEF were less likely to be referred to a cardiologist than those  
51  
52 with HFrEF without COPD (OR<sub>adj</sub>: 0.85, 95% CI 0.81-0.88) while patients with COPD-HFpEF were  
53  
54  
55  
56  
57

1  
2  
3 significantly less likely to be referred, compared to HFpEF without COPD ( $OR_{adj}$ , 95%CI 0.73,  
4 0.70-0.76). COPD was associated with a decreased likelihood of documented HF-MDT referral  
5  
6 only for patients with HFpEF ( $OR_{adj}$ , 95%CI, 0.90, 0.86-0.94).  
7  
8  
9

10  
11 Overall, referral odds did not differ in patients with asthma-HF compared to those with HF-  
12  
13 alone. There was a significant increase in the odds of referral to a cardiologist for those with  
14  
15 asthma-HFrEF ( $OR_{adj}$ , 95%CI 1.08, 1.03-1.14) and a decreased likelihood of referral for patients  
16  
17 with asthma-HFpEF ( $OR_{adj}$ , 95%CI, 0.93, 0.88-0.98), compared to HFrEF, HFpEF-alone, respectively.  
18  
19 Referrals to HF nurse or HF MDT were not different between those with HF alone or HF and  
20  
21 asthma (**Figure 2**).  
22  
23  
24

#### 25 26 *HF medication prescription at discharge*

27  
28  
29 Patients with COPD-HF had lower prescription proportions of ACEIs/ARBs, beta-blockers and  
30  
31 double (ACEi/ARB+beta-blocker) and triple-therapy (ACEi/ARB+beta-blocker+MRA) compared  
32  
33 to those with HF-only. ACEIs/ARBs, MRAs and triple-therapy were prescribed more frequently  
34  
35 in the asthma-HF group compared with the HF-alone group; however beta-blockers or double-  
36  
37 therapy were less often prescribed for asthma-HF vs. HF-alone (**Figure 3**).  
38  
39  
40

41  
42 In patients with HFrEF, COPD and asthma were associated with decreased likelihood of beta-  
43  
44 blocker prescription at discharge ( $OR_{adj}$  0.66, 95%CI 0.59-0.67,  $OR_{adj}$ : 0.57, 95%CI 0.54-0.60).  
45  
46 COPD was associated with lower chance of ACEi/ARB prescription, but did not affect MRA  
47  
48 prescriptions, while asthma was associated with increased odds of ACEi/ARB and MRA (**Table**  
49  
50  
51  
52  
53  
54  
55  
56  
57  
58  
59  
60

## 55 56 **Discussion**

1  
2  
3 This is the first study to provide a large assessment of contemporary HF practice, generalisable  
4 to the population of England-Wales, evaluating the effect of COPD and asthma on clinical and  
5 management outcomes. We found that patients with COPD-HF were more likely to die during  
6 their HF admission, compared to patients with HF-only; those with asthma-HF had a reduced  
7 probability of in-hospital death, compared to patients with HF-alone. Referrals to HF services  
8 also differed: COPD was associated with a 21% reduction in post-discharge cardiology referral  
9 whilst a diagnosis of asthma did not affect this outcome.  
10  
11  
12  
13  
14  
15  
16  
17  
18  
19  
20

21 Airways diseases, particularly COPD is associated with adverse events in patients with HF<sup>1-3 14-16</sup>,  
22 however diagnostic misclassification is under-estimated and studies of the independent effect  
23 of asthma are lacking. We report several findings which add to previous literature.  
24  
25  
26  
27  
28

29 The finding that COPD is associated with in-hospital mortality confirms reports from previous  
30 European data which considered longer term follow-ups<sup>17 18</sup>. A greater severity of  
31 cardiovascular disease amongst those with COPD-HF may have contributed to the increase in  
32 mortality, as indicated by the higher proportions of patients in NYHA classes III and IV,  
33 compared with those with HF alone. Further explanations could include admission to non-  
34 cardiology wards for COPD-HF patients, which has been linked with poorer outcomes in acute  
35 HF<sup>19</sup>.  
36  
37  
38  
39  
40  
41  
42  
43  
44  
45

46 A COPD diagnosis was associated with increased in-hospital death in those with HFrEF, but not  
47 in those with HFpEF, which is surprising, given that COPD is suggested to be more severe in the  
48 latter group<sup>20</sup>. In contrast with our report, previous studies found that risk of death is increased  
49 in those with COPD-HFpEF compared to COPD-HFrEF<sup>21 22</sup>, however these may be confounded by  
50 a lack of validity of EF status (inferred by ICD codes rather than echocardiography) or  
51  
52  
53  
54  
55  
56  
57  
58  
59  
60



1  
2  
3 spirometry to confirm COPD status, consideration of long-term rather than short term effects  
4  
5 on mortality, or by including chronic rather than hospitalised HF. Our result therefore may be  
6  
7 explained by poor uptake of disease-modifying treatments available for HFrEF in those with  
8  
9 COPD<sup>17</sup>, which has been previously reported and could be more pronounced in a cohort of  
10  
11 patients newly admitted for HF.  
12  
13

14  
15 After adjusting for age, sex and other baseline characteristics including comorbidities, and  
16  
17 further adjustments for smoking status and BMI, differences between those with and without  
18  
19 COPD, respectively asthma, did not materially change the association between the two lung  
20  
21 diseases with in-hospital mortality. This suggests an independent contribution of COPD to  
22  
23 increased mortality in patients hospitalised with HF, significant beyond the potential  
24  
25 confounders considered in this analysis.  
26  
27

28  
29 While previous reports suggest asthma is associated with increased risk of developing  
30  
31 cardiovascular disease<sup>6</sup>, no prior study has reported on the association between asthma and  
32  
33 death during acute HF hospitalisation. We found that, on average, asthma was independently  
34  
35 associated with a 24% reduction in risk of death in patients with HF. The mechanisms  
36  
37 underlying this epidemiological association are unclear. Several factors may explain our result.  
38  
39 Asthma management is reliant on anti-inflammatory agents such as inhaled corticosteroids  
40  
41 (ICS), which have been linked to cardioprotective effects<sup>23 24</sup> including lower all-cause mortality  
42  
43 and lower risk of myocardial infarction ([MI], a precursor to HF). Potential long-term ICS use in  
44  
45 our asthma-HF cohort could have diminished patients' baseline mortality risk.  
46  
47  
48  
49  
50  
51

52  
53 The nature of inflammation is different in COPD compared with asthma, and influences  
54  
55 response to medication. One hypothesis which may underlie the diverging findings on the  
56  
57

1  
2  
3 effect of the two lung diseases on outcomes in patients with HF thus relates to differences in  
4 management and their subsequent differential cardiovascular risk. Bronchodilator medications,  
5 which are central to the symptomatic treatment of COPD, have been associated with increased  
6 cardiovascular risk<sup>9</sup>. While combination treatments such as ICS/LABA may have a good  
7 cardiovascular safety profile in asthma, this differs in COPD<sup>8 16</sup>. RCTs have not demonstrated  
8 mortality benefits with ICS in individuals with COPD, although some observational studies  
9 suggest the opposite. The largest trial<sup>25</sup> examining all-cause mortality in 16,000 patients with  
10 COPD and risk of cardiovascular disease showed the treatments evaluated (long-acting beta-  
11 agonists and/or inhaled corticosteroids) were well tolerated by patients, however the effect on  
12 patients with existing HF remains under debate.

13  
14  
15 Since both lung diseases were diagnosed prior to HF admission, it would be plausible to assume  
16 that any effects of long-term pulmonary medication could influence the chance of death in our  
17 cohort. Thus, the heightened risk of in-hospital mortality observed in the COPD-HF group, but  
18 not in asthma-HF could be related to more frequent use of bronchodilators and a poorer safety  
19 profile of ICS in COPD compared to asthma. Alternatively, COPD-specific characteristics such as  
20 such as progressive lung function decline may have influenced in-hospital mortality in those  
21 admitted for HF.

22  
23  
24 However, due to large amounts of missing data on respiratory disease medication prescription  
25 in our cohort (**Supplemental Table 7**), we could not verify these assumptions in our dataset.  
26  
27 Future studies incorporating accurate information on bronchodilator use in patients with  
28 concomitant HF and respiratory disease should be conducted.

1  
2  
3 The association between COPD/asthma and referral to follow-up cardiology services has not  
4  
5 been studied before in hospitalised HF patients. Overall, patients with COPD-HF were less likely  
6  
7 to be referred to a cardiology service after hospital discharge, compared with those who had  
8  
9 HF-alone. This indicates that a COPD diagnosis may be an obstacle preventing access to HF  
10  
11 specialist care. According to NICE, all patients with a HF diagnosis need to be seen by a HF  
12  
13 specialist within two weeks of discharge, but data suggest these timelines are not met<sup>26</sup>. The  
14  
15 compounded effect of a COPD diagnosis has the potential to further impair the long-term  
16  
17 prognosis of these comorbid patients. Further, more than 60% of patients with COPD and HF  
18  
19 were admitted to a general ward rather than a specialised cardiology ward, which may also  
20  
21 explain the low likelihood of cardiology referrals in this group.  
22  
23  
24  
25  
26  
27

28 Our study also indicated EF status mediated the relationship with referrals, as individuals with  
29  
30 COPD-HFpEF were less likely to have an appointment compared with their COPD-HFrEF  
31  
32 counterparts. This is particularly worrying as HF, irrespective of EF, is best monitored and  
33  
34 managed within specialist HF teams.  
35  
36  
37

38 Asthma did not adversely influence referrals to HF services, but we identified an increased  
39  
40 likelihood of referral to cardiology in asthma-HFpEF as compared with asthma-HFrEF. One  
41  
42 possible explanation is greater uncertainty in clinical management of patients with HFpEF,  
43  
44 leading to increased referral, though this needs to be assessed in future studies. Clarifying these  
45  
46 clinical management pathways offers a potential to improve HF prognosis by ensuring access to  
47  
48 care is timely and tailored to individual patients' risk, pathology, and health.  
49  
50  
51  
52  
53  
54  
55  
56  
57

1  
2  
3 Patients with COPD-HFrEF were 34% less likely to receive a beta-blocker prescription at  
4  
5 discharge, compared with patients with HFrEF alone, despite recent data supporting use of  
6  
7 these agents in COPD<sup>27 28</sup>. Similar to data on patients post-MI<sup>29</sup>, it is worrying that COPD was  
8  
9 also associated with decreased likelihood of guideline recommended ACEi/ARB prescription in  
10  
11 those with HF, as there is no contraindication for those with pulmonary disease. Efforts need to  
12  
13 be made to ensure appropriate therapeutic management of these patients.  
14  
15

16  
17  
18 Those with asthma-HFrEF had 43% less chance of being prescribed a beta-blocker compared  
19  
20 with patients with HF-alone. Current guidelines recommend that asthma patients with chronic  
21  
22 HFrEF should not receive disease-modifying beta-blocker treatment due to possible  
23  
24 bronchoconstriction, despite evidence to suggest that cardioselective beta-blockade may be  
25  
26 used with careful up-titration and monitoring<sup>30 31</sup>, where benefits may outweigh risks in  
27  
28 individual patients. Based on the low uptake across the whole spectrum of HF medications in  
29  
30 patients with additional lung disease (**Figure 3**), we expect these patients would have worse  
31  
32 prognosis compared to their more adequately treated counterparts.  
33  
34  
35

36  
37  
38 Considering these results, management needs to be optimized in patients with COPD or asthma  
39  
40 and concurrent HF. The arrival of new treatments such as sodium-glucose co-transporter 2  
41  
42 inhibitors (SGLT2-i) have widened treatment choice in HFrEF, and there is now evidence  
43  
44 supporting their use in individuals with COPD<sup>32</sup>. Given beta-blockers are avoided in asthma,  
45  
46 these new treatments should urgently be assessed in this population, as data are currently  
47  
48 lacking.  
49  
50  
51

### 52 53 54 **Strengths and limitations** 55 56 57

1  
2  
3 The main strength of this study is the large sample size and representativeness of a hospitalised  
4 population with HF from England and Wales. We did not have however have information on  
5 duration and severity of asthma or COPD, nor lung function test results and thus we could not  
6 verify accuracy of these diagnoses, which are often subject to misclassification, especially in the  
7 elderly<sup>33</sup>. Data on bronchodilator use was largely missing for our cohort (**Supplemental Table**  
8 **7**), limiting assessment of both diagnostic accuracy of the respiratory diseases, and association  
9 with outcomes evaluated in this study. We also could not differentiate between childhood  
10 asthma or late-onset asthma which may have different implications <sup>34</sup>.

11  
12  
13 HFpEF was determined as a HF diagnosis without systolic dysfunction, which has been used in  
14 previous NHFA reports. Nevertheless, there is no consensus gold standard HFpEF diagnosis<sup>12</sup>  
15 and it remains difficult to validate. Further work in this area is needed, particularly in accurately  
16 distinguishing between HFpEF and COPD, which have similar clinical presentation.

17  
18  
19 There was a considerable proportion of missing data on bronchodilators/inhaled corticosteroids  
20 in the dataset which prevented assessment of whether the impact of COPD and asthma on  
21 outcomes is mediated, in part, by their treatment. Future studies incorporating accurate  
22 information on bronchodilator use in patients with concomitant HF and respiratory disease  
23 should be conducted.

24  
25  
26 Smoking status was also characterised by a large percentage of missing data, however an  
27 analysis using multiple imputation indicated that even after adjusting for this confounder in the  
28 imputed dataset, the association between both COPD and asthma on in-hospital mortality  
29 remained unchanged. (**Supplementary Table 5**).

1  
2  
3 We only focused on decompensated HF and the picture may change when investigating long-  
4 term mortality, recurrent admissions, or other aspects of treatment such as medication  
5 adherence.  
6  
7  
8  
9

10  
11 While the referral likelihood estimates provide a first glimpse into the association between  
12 COPD/asthma and potential healthcare service provision for HF patients in England-Wales, we  
13 did not have access to data on concrete healthcare utilisation amongst our cohort.  
14  
15  
16  
17

18  
19 Due to lack of data, we could not establish whether cause of death varied amongst the groups  
20 and whether the increased mortality associated with COPD was underlined by higher rates of  
21 respiratory versus cardiac or other disease.  
22  
23  
24  
25  
26

## 27 **Conclusion**

28  
29  
30 This analysis adds to the growing body of evidence that COPD and asthma affect outcomes in  
31 patients with acute HF. Our data suggest that while COPD is a main contributor to in-hospital  
32 mortality and is associated with decreased referral to cardiology services amongst HF patients,  
33 asthma does not negatively impact these outcomes. Both lung diseases are however  
34 responsible for significant decreases in the prescription of HF treatments at discharge,  
35 particularly beta-blockers. These findings highlight a need for better integration of  
36 cardiopulmonary services with an aim to tailor healthcare provision for these patients.  
37  
38  
39  
40  
41  
42  
43  
44  
45  
46  
47

## 48 **Competing interests**

49  
50  
51 CG, CK and RZ have nothing to declare. Prof. Quint's research group has received funds from AZ,  
52 GSK, The Health Foundation, MRC, British Lung Foundation, IQVIA, Chiesi, and Asthma UK outside  
53  
54  
55  
56  
57

1  
2  
3 the submitted work; grants and personal fees from GlaxoSmithKline, Boehringer Ingelheim,  
4  
5 AstraZeneca, Bayer, Insmmed outside the submitted work.  
6

### 7 8 9 **Data availability**

10  
11 The data that support the findings of this study have been provided by the Healthcare Quality  
12  
13 Improvement Partnership from the National Heart Failure Audit Programme, but restrictions  
14  
15 apply to the availability of these data and so are not publicly available.  
16  
17

### 18 19 20 **Financial disclosure**

21  
22 CG is funded by a NHLI PhD studentship. Grant number: N/A.  
23  
24  
25

### 26 27 28 **Author contributions**

29  
30 Conceptualization & Methodology: CG, JKQ, CK. Original draft: CG. Editing and final approval:  
31  
32 CG, JKQ, RZ, CK; Data curation & Formal data analysis: CG; Data acquisition: JKQ.  
33  
34

### 35 36 37 **Ethics approval**

38  
39 This study involved analysis of pre-existing, de-identified data, thus it was exempt from  
40  
41 Institutional Review Board approval.  
42

### 43 44 45 **Patient and public involvement**

46  
47 Patients were not involved in the design and conduct of the study.  
48  
49  
50  
51  
52  
53  
54  
55  
56  
57

### Figure legends

Figure 1 - Association between COPD, asthma and in-hospital death, adjusted for age, sex, valve disease; IHD, hypertension, diabetes, AF, NYHA, place of care and EF status; odds ratio with 95% confidence intervals.

Figure 2. Association between COPD, asthma and referrals to HF services, adjusted for age, sex, valve disease; IHD, hypertension, diabetes, AF, NYHA, place of care and EF status.

Figure 3. HF-medication prescription rates at discharge, according to comorbid respiratory disease status



**Table 1.** Baseline characteristics according to COPD and asthma status, in patients hospitalised for HF in England-Wales.

|                                                 | <b>HF alone<br/>(N=170297)</b> | <b>COPD + HF<br/>(N=32695)</b> | <b>Asthma + HF<br/>(N=14400)</b> | <b>Overall<br/>(N=217,392)</b> |
|-------------------------------------------------|--------------------------------|--------------------------------|----------------------------------|--------------------------------|
| Age, median [IQR]                               | 81 [72, 88]                    | 79 [72, 85]                    | 79 [69, 86]                      | 81 [72, 87]                    |
| Missing                                         | 67 (0.1%)                      | 22 (0.1%)                      | 10 (0.1%)                        | 199 (0.1%)                     |
| Male                                            | 91837 (53.9%)                  | 19072 (58.3%)                  | 5936 (41.2%)                     | 116845 (53.7%)                 |
| Missing                                         | 74 (0.1%)                      | 44 (0.1%)                      | 21 (0.1%)                        | 239 (0.1%)                     |
| <b>Place of admission</b>                       |                                |                                |                                  |                                |
| Cardiology                                      | 76428 (44.9%)                  | 12361 (37.8%)                  | 6147 (42.7%)                     | 94936 (43.7%)                  |
| Other                                           | 93358 (54.8%)                  | 20246 (61.9%)                  | 8218 (57.1%)                     | 21822 (56.0%)                  |
| Missing                                         | 511 (0.3%)                     | 88 (0.3%)                      | 35 (0.2%)                        | 634 (0.3%)                     |
| <b>Died in-hospital</b>                         | 20316 (11.9%)                  | 4181 (12.8%)                   | 1337 (9.3%)                      | 25834 (11.9%)                  |
| <b>Device therapy</b>                           |                                |                                |                                  |                                |
| None                                            | 147485 (86.6%)                 | 28962 (88.6%)                  | 12818 (89.0%)                    | 189265 (87.1%)                 |
| CRT-D                                           | 3047 (1.8%)                    | 496 (1.5%)                     | 189 (1.3%)                       | 3732 (1.7%)                    |
| CRT-P                                           | 1681 (1%)                      | 296 (0.9%)                     | 142 (1%)                         | 2119 (1.0%)                    |
| ICD                                             | 3001 (1.8%)                    | 511 (1.6%)                     | 211 (1.5%)                       | 0 (0%)                         |
| Missing                                         | 15083 (8.9%)                   | 2430 (7.4%)                    | 1040 (7.2%)                      | 18553 (8.5%)                   |
| <b>Comorbidities</b>                            |                                |                                |                                  |                                |
| Valve disease                                   | 38213 (22.4%)                  | 7005 (21.4%)                   | 2906 (20.2%)                     | 48124 (22.1%)                  |
| Missing                                         | 3426 (2.0%)                    | 822 (2.5%)                     | 335 (2.3%)                       | 4583 (2.1%)                    |
| IHD                                             | 65992 (38.8%)                  | 14198 (43.4%)                  | 5175 (35.9%)                     | 85365 (39.3%)                  |
| Missing                                         | 3667 (2.2%)                    | 811 (2.5%)                     | 335 (2.3%)                       | 4813 (2.2%)                    |
| Hypertension                                    | 91477 (53.7%)                  | 16838 (51.5%)                  | 8208 (57%)                       | 116523 (53.6%)                 |
| Missing                                         | 1326 (0.8%)                    | 381 (1.2%)                     | 125 (0.9%)                       | 1832 (0.8%)                    |
| Diabetes                                        | 50194 (29.5%)                  | 10348 (31.7%)                  | 4772 (33.1%)                     | 65314 (30%)                    |
| Missing                                         | 459 (0.3%)                     | 142 (0.4%)                     | 54 (0.4%)                        | 655 (0.3%)                     |
| AF                                              | 72235 (42.4%)                  | 13728 (42%)                    | 5508 (38.2%)                     | 91471 (42.1%)                  |
| <b>Breathlessness (NYHA)</b>                    |                                |                                |                                  |                                |
| No limitation of physical activity              | 12273 (7.2%)                   | 1254 (3.8%)                    | 768 (5.3%)                       | 14295 (6.6%)                   |
| Slight Limitation of ordinary physical activity | 24541 (14.4%)                  | 3951 (12.1%)                   | 1993 (13.8%)                     | 30485 (14%)                    |
| Marked Limitation of ordinary physical activity | 68179 (40%)                    | 13671 (41.8%)                  | 6011 (41.7%)                     | 87861 (40.4%)                  |
| Symptoms at rest or minimal activity            | 54652 (32.1%)                  | 12191 (37.3%)                  | 4809 (33.4%)                     | 71652 (33%)                    |
| Missing                                         | 10652 (6.3%)                   | 1628 (5.0%)                    | 819 (5.7%)                       | 13099 (6.0%)                   |
| <b>Echocardiography performed</b>               | 137955 (81%)                   | 26165 (80%)                    | 11342 (78.8%)                    | 175462 (80.7%)                 |
| <b>Ejection fraction status</b>                 |                                |                                |                                  |                                |
| HFrEF                                           | 92619 (54.4%)                  | 16408 (50.2%)                  | 7334 (50.9%)                     | 116361 (53.5%)                 |

|                                                                                                                                                                                                                                                                                                                                                                                                                                                                                                                                                           | <b>HF alone<br/>(N=170297)</b> | <b>COPD + HF<br/>(N=32695)</b> | <b>Asthma + HF<br/>(N=14400)</b> | <b>Overall<br/>(N=217,392)</b> |
|-----------------------------------------------------------------------------------------------------------------------------------------------------------------------------------------------------------------------------------------------------------------------------------------------------------------------------------------------------------------------------------------------------------------------------------------------------------------------------------------------------------------------------------------------------------|--------------------------------|--------------------------------|----------------------------------|--------------------------------|
| HFpEF                                                                                                                                                                                                                                                                                                                                                                                                                                                                                                                                                     | 77678 (45.6%)                  | 16287 (49.8%)                  | 7066 (49.1%)                     | 101031 (46.5%)                 |
| <b>HF management plan</b>                                                                                                                                                                                                                                                                                                                                                                                                                                                                                                                                 |                                |                                |                                  |                                |
| Pre-discharge management plan in place                                                                                                                                                                                                                                                                                                                                                                                                                                                                                                                    | 11760 (6.9%)                   | 2152 (6.6%)                    | 1002 (7.0%)                      | 14914 (6.9%)                   |
| Management plan has been discussed with the patient                                                                                                                                                                                                                                                                                                                                                                                                                                                                                                       | 10572 (6.2%)                   | 1894 (5.8%)                    | 954 (6.6%)                       | 13420 (6.2%)                   |
| Management plan has been communicated to the primary care team                                                                                                                                                                                                                                                                                                                                                                                                                                                                                            | 19880 (11.7%)                  | 3963 (12.1%)                   | 1780 (12.4%)                     | 25623 (11.8%)                  |
| All of the above                                                                                                                                                                                                                                                                                                                                                                                                                                                                                                                                          | 83507 (49%)                    | 15496 (47.4%)                  | 7140 (49.6%)                     | 106143 (48.8%)                 |
| No plan                                                                                                                                                                                                                                                                                                                                                                                                                                                                                                                                                   | 18021 (10.6%)                  | 3937 (12.0%)                   | 1546 (10.7%)                     | 23504 (10.8%)                  |
| Missing                                                                                                                                                                                                                                                                                                                                                                                                                                                                                                                                                   | 26557 (15.6%)                  | 5253 (16.1%)                   | 1978 (13.7%)                     | 33788 (15.5%)                  |
| <b>Referral to HF MDT</b>                                                                                                                                                                                                                                                                                                                                                                                                                                                                                                                                 | 53898 (31.6%)                  | 9719 (29.7%)                   | 4455 (30.9%)                     | 68072 (31.3%)                  |
| Missing                                                                                                                                                                                                                                                                                                                                                                                                                                                                                                                                                   | 29946 (17.6%)                  | 5722 (17.5%)                   | 2216 (15.4%)                     | 37884 (17.4%)                  |
| <b>Referral to cardiology follow up</b>                                                                                                                                                                                                                                                                                                                                                                                                                                                                                                                   | 70925 (41.6%)                  | 11875 (36.3%)                  | 6241 (43.3%)                     | 89041 (41%)                    |
| Missing                                                                                                                                                                                                                                                                                                                                                                                                                                                                                                                                                   | 13827 (8.1%)                   | 2882 (8.8%)                    | 984 (6.8%)                       | 17693 (8.1%)                   |
| <b>Referral to HF nurse follow-up</b>                                                                                                                                                                                                                                                                                                                                                                                                                                                                                                                     | 76170 (44.7%)                  | 13728 (42.0%)                  | 6249 (43.4%)                     | 96147 (44.2%)                  |
| Missing                                                                                                                                                                                                                                                                                                                                                                                                                                                                                                                                                   | 13442 (7.9%)                   | 2658 (8.1%)                    | 952 (6.6%)                       | 17052 (7.8%)                   |
| <b>LOS</b>                                                                                                                                                                                                                                                                                                                                                                                                                                                                                                                                                |                                |                                |                                  |                                |
| Median [IQR]                                                                                                                                                                                                                                                                                                                                                                                                                                                                                                                                              | 8 [3, 15]                      | 8 [4, 16]                      | 7 [3, 14]                        | 8 [4, 15]                      |
| <b>IMD Wales (quartile)</b>                                                                                                                                                                                                                                                                                                                                                                                                                                                                                                                               | <b>N=8205</b>                  | <b>N=1889</b>                  | <b>N=776</b>                     | <b>N= N=10870</b>              |
| 1 <sup>st</sup> (most deprived)                                                                                                                                                                                                                                                                                                                                                                                                                                                                                                                           | 2126 (25.9%)                   | 371 (19.6%)                    | 188 (24.2%)                      | 2685 (24.7%)                   |
| 2 <sup>nd</sup>                                                                                                                                                                                                                                                                                                                                                                                                                                                                                                                                           | 2058 (25.1%) 396               | (21.0%)<br>190                 | (24.5%)<br>83                    | 2644 (24.3%)                   |
| 3 <sup>rd</sup>                                                                                                                                                                                                                                                                                                                                                                                                                                                                                                                                           | 1977 (24.1%)                   | 459 (24.3%)                    | 196 (25.3%)                      | 2632 (24.2%)                   |
| 4 <sup>th</sup> (least deprived)                                                                                                                                                                                                                                                                                                                                                                                                                                                                                                                          | 1824 (22.2%)                   | 607 (32.1%)                    | 185 (23.8%)                      | 2616 (24.1%)                   |
| Missing*                                                                                                                                                                                                                                                                                                                                                                                                                                                                                                                                                  | -                              | -                              | -                                | -                              |
| <b>IMD England (quartile)</b>                                                                                                                                                                                                                                                                                                                                                                                                                                                                                                                             | <b>N=159540</b>                | <b>N=30352</b>                 | <b>N=13433</b>                   | <b>N=203325</b>                |
| 1 <sup>st</sup> (most deprived)                                                                                                                                                                                                                                                                                                                                                                                                                                                                                                                           | 35836 (22.5%)                  | 9338 (30.8%)                   | 3449 (25.7%)                     | 48623 (23.9%)                  |
| 2 <sup>nd</sup>                                                                                                                                                                                                                                                                                                                                                                                                                                                                                                                                           | 38347 (24.0%)                  | 7762 (25.6%)                   | 3403 (25.3%)                     | 49512 (24.4%)                  |
| 3 <sup>rd</sup>                                                                                                                                                                                                                                                                                                                                                                                                                                                                                                                                           | 40131 (25.2%)                  | 6848 (22.6%)                   | 3166 (23.6%)                     | 50145 (24.7%)                  |
| 4 <sup>th</sup> (least deprived)                                                                                                                                                                                                                                                                                                                                                                                                                                                                                                                          | 41387 (25.9%)                  | 5615 (18.5%)                   | 3072 (22.9%)                     | 50074 (24.6%)                  |
| Missing                                                                                                                                                                                                                                                                                                                                                                                                                                                                                                                                                   | 3839 (2.4%)                    | 789 (2.6%)                     | 343 (2.6%)                       | 4971 (2.4%)                    |
| AF= atrial fibrillation; COPD= chronic obstructive pulmonary disease; CRT-P= cardiac resynchronisation therapy pacemaker; CRT-D= cardiac resynchronisation therapy defibrillator; HF= heart failure; HFpEF= heart failure with reduced ejection fraction; *HFpEF= heart failure with preserved ejection fraction; ICD= implantable cardioverter defibrillator; IHD= ischemic heart disease; IMD= indices of multiple deprivation; LOS= length of stay; MDT= multi-disciplinary team; NYHA = New York Heart Association; * not shown due to small numbers. |                                |                                |                                  |                                |

**Table 2 – Association between COPD, asthma and outcomes in patients hospitalised for HF in England-Wales**

| Outcome                                                                                                                                                                                                                                                                | Fully adjusted <sup>a</sup> interaction model<br>COPD*EF<br>OR (95% CI) |                                                 | Fully adjusted <sup>b</sup> interaction model<br>Asthma*EF<br>OR (95% CI) |                               |
|------------------------------------------------------------------------------------------------------------------------------------------------------------------------------------------------------------------------------------------------------------------------|-------------------------------------------------------------------------|-------------------------------------------------|---------------------------------------------------------------------------|-------------------------------|
|                                                                                                                                                                                                                                                                        | COPD * HFpEF                                                            | COPD* HFpEF                                     | Asthma * HFpEF                                                            | Asthma * HFpEF                |
| <b>In-hospital death</b><br>(N= 194,156 <sup>c</sup> )                                                                                                                                                                                                                 | Interaction <i>P</i> -value = 0.01                                      |                                                 | Interaction <i>P</i> -value = 0.842                                       |                               |
| Fixed-effects                                                                                                                                                                                                                                                          | 1.15 (1.09 – 1.21,<br>p=0.294*10 <sup>-10</sup> )                       | 1.05 (0.99 – 1.10,<br>p=0.081)                  | -                                                                         | -                             |
| <i>Random effects (hospitals, n=216)</i>                                                                                                                                                                                                                               |                                                                         |                                                 |                                                                           |                               |
| <i>Variance</i>                                                                                                                                                                                                                                                        | 0.201                                                                   |                                                 | -                                                                         |                               |
| <i>LR test P-value<sup>d</sup></i>                                                                                                                                                                                                                                     | <i>P</i> =0.22*10 <sup>-16</sup>                                        |                                                 | -                                                                         | -                             |
| <b>Referral to cardiology follow-up</b><br>(N= 166,658 <sup>c</sup> )                                                                                                                                                                                                  | Interaction <i>P</i> -value= 0.288*10 <sup>-7</sup>                     |                                                 | Interaction <i>P</i> -value=0.0001                                        |                               |
| Fixed effects                                                                                                                                                                                                                                                          | 0.85 (0.81, 0.88,<br>p=0.2*10 <sup>-16</sup> )                          | 0.73 (0.70, 0.76,<br>p=0.2*10 <sup>-16</sup> )  | 1.08 (1.03-1.14,<br>p=0.2*10 <sup>-16</sup> )                             | 0.93 (0.88- 0.98,<br>p=0.003) |
| <i>Random effects (hospitals, n=216)</i>                                                                                                                                                                                                                               |                                                                         |                                                 |                                                                           |                               |
| <i>Variance</i>                                                                                                                                                                                                                                                        | 0.512                                                                   |                                                 | 0.512                                                                     |                               |
| <i>LR test p-value<sup>d</sup></i>                                                                                                                                                                                                                                     | 0.22*10 <sup>-16</sup>                                                  |                                                 | <i>P</i> =0.22*10 <sup>-16</sup>                                          |                               |
| <b>Referral to HF MDT</b><br>(N=149,098 <sup>c</sup> )                                                                                                                                                                                                                 | Interaction <i>P</i> -value = 0.017                                     |                                                 | Interaction <i>P</i> -value=0.095                                         |                               |
| Fixed effects                                                                                                                                                                                                                                                          | 0.97 (0.93, 1.02,<br>p=0.263)                                           | 0.90 (0.86, 0.94,<br>p=0.265*10 <sup>-5</sup> ) | -                                                                         | -                             |
| <i>Random effects (hospitals, n=216)</i>                                                                                                                                                                                                                               |                                                                         |                                                 |                                                                           |                               |
| <i>Variance</i>                                                                                                                                                                                                                                                        | 2.139                                                                   |                                                 | -                                                                         | -                             |
| <i>LR test p-value<sup>d</sup></i>                                                                                                                                                                                                                                     | 0.22*10 <sup>-16</sup>                                                  |                                                 | -                                                                         | -                             |
| <b>Referral to HF nurse</b><br>(N= 166,723 <sup>c</sup> )                                                                                                                                                                                                              | Interaction <i>P</i> -value = 0.249                                     |                                                 | Interaction <i>P</i> -value = 0.450                                       |                               |
| COPD= chronic obstructive pulmonary disease; HF= heart failure; HFpEF= heart failure with reduced ejection fraction; HFpEF= heart failure with preserved ejection fraction; LR= likelihood ratio; MDT= multidisciplinary team; OR= odds ratio; CI= confidence interval |                                                                         |                                                 |                                                                           |                               |
| <sup>a</sup> Adjusted for age, sex, diabetes, hypertension, ischemic heart disease, atrial fibrillation, asthma, place of care and New York Heart Association status                                                                                                   |                                                                         |                                                 |                                                                           |                               |
| <sup>b</sup> Adjusted for age, sex, diabetes, hypertension, ischemic heart disease, atrial fibrillation, COPD, place of care and New York Heart Association status                                                                                                     |                                                                         |                                                 |                                                                           |                               |
| <sup>c</sup> Excludes patients with missing data on covariates included in model                                                                                                                                                                                       |                                                                         |                                                 |                                                                           |                               |

<sup>d</sup> Likelihood ratio test comparing fixed to random effects for hospital model fit, significant indicates random effects model performed better than fixed effects model

For peer review only

**Table 3. Association between COPD, asthma and HF medication prescription at discharge, in patients with HFrEF**

| Medication prescription at discharge                                                                                                                                                                                                                                                                                                                                                                                                                                                                                                                                                                                                              | COPD unadjusted OR (95%CI)                    | COPD fully adjusted <sup>a</sup> OR (95%CI)  | Asthma unadjusted OR (95%CI)                 | Asthma fully adjusted <sup>b</sup> OR (95%CI) |
|---------------------------------------------------------------------------------------------------------------------------------------------------------------------------------------------------------------------------------------------------------------------------------------------------------------------------------------------------------------------------------------------------------------------------------------------------------------------------------------------------------------------------------------------------------------------------------------------------------------------------------------------------|-----------------------------------------------|----------------------------------------------|----------------------------------------------|-----------------------------------------------|
| <b>Beta-blockers (N= 86449<sup>a,b</sup>)</b>                                                                                                                                                                                                                                                                                                                                                                                                                                                                                                                                                                                                     |                                               |                                              |                                              |                                               |
| Fixed effects                                                                                                                                                                                                                                                                                                                                                                                                                                                                                                                                                                                                                                     | 0.61 (0.58, 0.64, p=0.22*10 <sup>-16</sup> )  | 0.66 (0.64, 0.68, P=0.22*10 <sup>-16</sup> ) | 0.63 (0.59, 0.67, p=0.22*10 <sup>-16</sup> ) | 0.57 (0.54 0.60, p=0.22*10 <sup>-16</sup> )   |
| Random effects                                                                                                                                                                                                                                                                                                                                                                                                                                                                                                                                                                                                                                    |                                               |                                              |                                              |                                               |
| Variance                                                                                                                                                                                                                                                                                                                                                                                                                                                                                                                                                                                                                                          | 0.553                                         | 0.578                                        | 0.549                                        | 0.578                                         |
| LR test p-value                                                                                                                                                                                                                                                                                                                                                                                                                                                                                                                                                                                                                                   | 0.22*10 <sup>-16</sup>                        | 0.22*10 <sup>-16</sup>                       | 0.22*10 <sup>-16</sup>                       | 0.22*10 <sup>-16</sup>                        |
| <b>ACEis/ARBs (N=96080<sup>a,b</sup>)</b>                                                                                                                                                                                                                                                                                                                                                                                                                                                                                                                                                                                                         |                                               |                                              |                                              |                                               |
| Fixed effects                                                                                                                                                                                                                                                                                                                                                                                                                                                                                                                                                                                                                                     | 0.87 (0.84, 0.90, p=0.139*10 <sup>-13</sup> ) | 0.91 (0.87-0.95, p=0.256*10 <sup>-6</sup> )  | 1.13 (1.07, 1.19, p=0.16*10 <sup>-6</sup> )  | 1.07 (1.01, 1.13, p=0.0143)                   |
| Random effects                                                                                                                                                                                                                                                                                                                                                                                                                                                                                                                                                                                                                                    |                                               |                                              |                                              |                                               |
| Variance                                                                                                                                                                                                                                                                                                                                                                                                                                                                                                                                                                                                                                          | 0.149                                         | 0.130                                        | 0.148                                        | 0.130                                         |
| LR test p-value                                                                                                                                                                                                                                                                                                                                                                                                                                                                                                                                                                                                                                   | 0.22*10 <sup>-16</sup>                        | 0.22*10 <sup>-16</sup>                       | 0.22*10 <sup>-16</sup>                       | 0.22*10 <sup>-16</sup>                        |
| <b>MRA (N=96080<sup>a,b</sup>)</b>                                                                                                                                                                                                                                                                                                                                                                                                                                                                                                                                                                                                                |                                               |                                              |                                              |                                               |
| Fixed effects                                                                                                                                                                                                                                                                                                                                                                                                                                                                                                                                                                                                                                     | 0.97 (0.94, 1.01, p=0.114)                    | 1.02 (0.98, 1.06, p=0.268)                   | 1.08 (1.04, 1.13, p=0.00043)                 | 1.07 (1.02, 1.12, p=0.0084)                   |
| Random effects                                                                                                                                                                                                                                                                                                                                                                                                                                                                                                                                                                                                                                    |                                               |                                              |                                              |                                               |
| Variance                                                                                                                                                                                                                                                                                                                                                                                                                                                                                                                                                                                                                                          | 0.232                                         | 0.195                                        | 0.226                                        | 0.195                                         |
| LR test p-value                                                                                                                                                                                                                                                                                                                                                                                                                                                                                                                                                                                                                                   | 0.22*10 <sup>-16</sup>                        | 0.22*10 <sup>-16</sup>                       | 0.22*10 <sup>-16</sup>                       | 0.22*10 <sup>-16</sup>                        |
| Abbreviations<br>COPD= chronic obstructive pulmonary disease; OR= odd ratio; CI= confidence intervals; LR= likelihood ratio<br><sup>a</sup> Adjusted for age, sex, diabetes, hypertension, ischemic heart disease, atrial fibrillation, asthma, place of care and New York Heart Association status<br><sup>b</sup> Adjusted for age, sex, diabetes, hypertension, ischemic heart disease, atrial fibrillation, COPD, place of care and New York Heart Association status<br>Likelihood ratio test comparing fixed to random effects for hospital model fit, significant indicates random effects model performed better than fixed effects model |                                               |                                              |                                              |                                               |

## References

1. Lawson CA, Mamas MA, Jones PW, et al. Association of Medication Intensity and Stages of Airflow Limitation With the Risk of Hospitalization or Death in Patients With Heart Failure and Chronic Obstructive Pulmonary Disease. *JAMA Netw Open* 2018;1(8):e185489. doi: 10.1001/jamanetworkopen.2018.5489 [published Online First: 2019/01/16]
2. Gulea C, Zakeri R, Quint JK. Impact of chronic obstructive pulmonary disease on readmission after hospitalization for acute heart failure: A nationally representative US cohort study. *Int J Cardiol* 2019;290:113-18. doi: 10.1016/j.ijcard.2019.04.087 [published Online First: 2019/05/19]
3. Hawkins NM, Virani S, Ceconi C. Heart failure and chronic obstructive pulmonary disease: the challenges facing physicians and health services. *Eur Heart J* 2013;34(36):2795-803. doi: 10.1093/eurheartj/ehz192 [published Online First: 2013/07/09]
4. Lipworth B, Wedzicha J, Devereux G, et al. Beta-blockers in COPD: time for reappraisal. *Eur Respir J* 2016;48(3):880-8. doi: 10.1183/13993003.01847-2015 [published Online First: 2016/07/09]
5. Baker JG, Wilcox RG. beta-Blockers, heart disease and COPD: current controversies and uncertainties. *Thorax* 2017;72(3):271-76. doi: 10.1136/thoraxjnl-2016-208412 [published Online First: 2016/12/09]
6. Pollevick ME, Xu KY, Mhango G, et al. The Relationship Between Asthma and Cardiovascular Disease: An Examination of the Framingham Offspring Study. *Chest* 2020 doi: 10.1016/j.chest.2020.11.053 [published Online First: 2020/12/15]
7. Iribarren C, Tolstykh IV, Miller MK, et al. Adult asthma and risk of coronary heart disease, cerebrovascular disease, and heart failure: a prospective study of 2 matched cohorts. *Am J Epidemiol* 2012;176(11):1014-24. doi: 10.1093/aje/kws181 [published Online First: 2012/11/10]
8. Buist AS. Similarities and differences between asthma and chronic obstructive pulmonary disease: treatment and early outcomes. *Eur Respir J Suppl* 2003;39:30s-35s. doi: 10.1183/09031936.03.00404903 [published Online First: 2003/02/08]
9. Salpeter SR, Ormiston TM, Salpeter EE. Cardiovascular effects of beta-agonists in patients with asthma and COPD: a meta-analysis. *Chest* 2004;125(6):2309-21. doi: 10.1378/chest.125.6.2309 [published Online First: 2004/06/11]
10. Gershon A, Croxford R, Calzavara A, et al. Cardiovascular safety of inhaled long-acting bronchodilators in individuals with chronic obstructive pulmonary disease. *JAMA Intern Med* 2013;173(13):1175-85. doi: 10.1001/jamainternmed.2013.1016 [published Online First: 2013/05/22]
11. Singh S, Loke YK, Enright PL, et al. Mortality associated with tiotropium mist inhaler in patients with chronic obstructive pulmonary disease: systematic review and meta-analysis of randomised controlled trials. *BMJ* 2011;342:d3215. doi: 10.1136/bmj.d3215 [published Online First: 2011/06/16]
12. Pieske B, Tschope C, de Boer RA, et al. How to diagnose heart failure with preserved ejection fraction: the HFA-PEFF diagnostic algorithm: a consensus recommendation from the Heart Failure Association (HFA) of the European Society of Cardiology (ESC). *Eur Heart J* 2019;40(40):3297-317. doi: 10.1093/eurheartj/ehz641 [published Online First: 2019/09/11]
13. The heart failure dataset for the National Audit of Heart failure. <https://www.nicor.org.uk/national-cardiac-audit-programme/datasets/>, Accessed 26 April 2021.
14. Hawkins NM, Petrie MC, Jhund PS, et al. Heart failure and chronic obstructive pulmonary disease: diagnostic pitfalls and epidemiology. *Eur J Heart Fail* 2009;11(2):130-9. doi: 10.1093/eurjhf/hfn013 [published Online First: 2009/01/27]
15. Lainscak M, Anker SD. Heart failure, chronic obstructive pulmonary disease, and asthma: numbers, facts, and challenges. *ESC Heart Fail* 2015;2(3):103-07. doi: 10.1002/ehf2.12055 [published Online First: 2016/10/07]
16. Rabe KF, Hurst JR, Suissa S. Cardiovascular disease and COPD: dangerous liaisons? *Eur Respir Rev* 2018;27(149) doi: 10.1183/16000617.0057-2018 [published Online First: 2018/10/05]
17. Canepa M, Straburzynska-Migaj E, Drozd J, et al. Characteristics, treatments and 1-year prognosis of hospitalized and ambulatory heart failure patients with chronic obstructive pulmonary disease in the European Society of Cardiology Heart Failure Long-Term Registry. *Eur J Heart Fail* 2018;20(1):100-10. doi: 10.1002/ejhf.964 [published Online First: 2017/09/28]
18. Staszewsky L, Cortesi L, Tettamanti M, et al. Outcomes in patients hospitalized for heart failure and chronic obstructive pulmonary disease: differences in clinical profile and treatment between 2002 and 2009. *Eur J Heart Fail* 2016;18(7):840-8. doi: 10.1002/ejhf.519 [published Online First: 2016/04/22]
19. Gheorghide M, Sopko G, De Luca L, et al. Navigating the crossroads of coronary artery disease and heart failure. *Circulation* 2006;114(11):1202-13. doi: 10.1161/CIRCULATIONAHA.106.623199 [published Online First: 2006/09/13]
20. Iversen KK, Kjaergaard J, Akkan D, et al. Chronic obstructive pulmonary disease in patients admitted with heart failure. *J Intern Med* 2008;264(4):361-9. doi: 10.1111/j.1365-2796.2008.01975.x [published Online First: 2008/06/10]
21. Ather S, Chan W, Bozkurt B, et al. Impact of noncardiac comorbidities on morbidity and mortality in a predominantly male population with heart failure and preserved versus reduced ejection fraction. *J Am Coll Cardiol* 2012;59(11):998-1005. doi: 10.1016/j.jacc.2011.11.040 [published Online First: 2012/03/10]

- 1  
2  
3 22. Museedi AS, Alshami A, Douedi S, et al. Predictability of Inpatient Mortality of Different Comorbidities in Both Types of  
4 Acute Decompensated Heart Failure: Analysis of National Inpatient Sample. *Cardiol Res* 2021;12(1):29-36. doi:  
5 10.14740/cr1186 [published Online First: 2021/01/16]
- 6 23. Camargo CA, Barr RG, Chen R, et al. Prospective study of inhaled corticosteroid use, cardiovascular mortality, and all-cause  
7 mortality in asthmatic women. *Chest* 2008;134(3):546-51. doi: 10.1378/chest.07-3126 [published Online First:  
8 2008/07/22]
- 9 24. Suissa S, Assimes T, Brassard P, et al. Inhaled corticosteroid use in asthma and the prevention of myocardial infarction. *The*  
10 *American Journal of Medicine* 2003;115(5):377-81. doi: 10.1016/s0002-9343(03)00393-0
- 11 25. Vestbo J, Anderson, J.A., Brook, R.D., Calverley, P.M., Celli, B.R., Crim, C., Martinez, F., Yates, J., Newby, D.E. and Summit  
12 Investigators. Fluticasone furoate and vilanterol and survival in chronic obstructive pulmonary disease with  
13 heightened cardiovascular risk (SUMMIT): a double-blind randomised controlled trial. *The Lancet*  
14 2016;387(10030):1817-26.
- 15 26. Hayhoe B, Kim D, Aylin PP, et al. Adherence to guidelines in management of symptoms suggestive of heart failure in primary  
16 care. *Heart* 2019;105(9):678-85. doi: 10.1136/heartjnl-2018-313971 [published Online First: 2018/12/06]
- 17 27. Gulea C, Zakeri R, Quint JK. Effect of beta-blocker therapy on clinical outcomes, safety, health-related quality of life and  
18 functional capacity in patients with chronic obstructive pulmonary disease (COPD): a protocol for a systematic  
19 literature review and meta-analysis with multiple treatment comparison. *BMJ Open* 2018;8(11):e024736. doi:  
20 10.1136/bmjopen-2018-024736 [published Online First: 2018/11/16]
- 21 28. Salpeter SR, Ormiston TM, Salpeter EE, et al. Cardioselective beta-blockers for chronic obstructive pulmonary disease: a  
22 meta-analysis. *Respiratory Medicine* 2003;97(10):1094-101. doi: 10.1016/s0954-6111(03)00168-9
- 23 29. Rothnie KJ, Liam Smeeth, Emily Herrett, Neil Pearce, Harry Hemingway, Jadwiga Wedzicha, Adam Timmis, and Jennifer K.  
24 Quint. Closing the mortality gap after a myocardial infarction in people with and without chronic obstructive  
25 pulmonary disease. *Heart* 2015;101(14):1103-10.
- 26 30. Shaw SM, Williams SG. Should beta-blockade continue to be withheld from patients with chronic heart failure and asthma?  
27 *European Heart Journal* 2009;30(10):1287-87. doi: 10.1093/eurheartj/ehp146
- 28 31. Gulea C, Zakeri R, Alderman V, et al. Beta-blocker therapy in patients with COPD: a systematic literature review and meta-  
29 analysis with multiple treatment comparison. *Respir Res* 2021;22(1):64. doi: 10.1186/s12931-021-01661-8 [published  
30 Online First: 2021/02/25]
- 31 32. Canepa M, Ameri P, Lainscak M. Chronic obstructive pulmonary disease and comorbidities in heart failure: the next frontier  
32 of sodium-glucose co-transporter 2 inhibitors? *Eur J Heart Fail* 2021 doi: 10.1002/ejhf.2109 [published Online First:  
33 2021/01/28]
- 34 33. Bloom CI, Nissen F, Douglas IJ, et al. Exacerbation risk and characterisation of the UK's asthma population from infants to  
35 old age. *Thorax* 2018;73(4):313-20. doi: 10.1136/thoraxjnl-2017-210650 [published Online First: 2017/10/28]
- 36 34. Ingebrigtsen TS, Marott JL, Vestbo J, et al. Coronary heart disease and heart failure in asthma, COPD and asthma-COPD  
37 overlap. *BMJ Open Respir Res* 2020;7(1) doi: 10.1136/bmjresp-2019-000470 [published Online First: 2020/12/30]
- 38  
39  
40  
41  
42  
43  
44  
45  
46  
47  
48  
49  
50  
51  
52  
53  
54  
55  
56  
57  
58  
59  
60





Figure 1 - Association between COPD, asthma and in-hospital death, adjusted for age, sex, valve disease; IHD, hypertension, diabetes, AF, NYHA, place of care and EF status; odds ratio with 95% confidence intervals.

581x452mm (118 x 118 DPI)



1  
2  
3  
4  
5  
6  
7  
8  
9  
10  
11  
12  
13  
14  
15  
16  
17  
18  
19  
20  
21  
22  
23  
24  
25  
26  
27  
28  
29  
30  
31  
32  
33  
34  
35  
36  
37  
38  
39  
40  
41  
42  
43  
44  
45  
46  
47  
48  
49  
50  
51  
52  
53  
54  
55  
56  
57  
58  
59  
60



Figure 2. Association between COPD, asthma and referrals to HF services, adjusted for age, sex, valve disease; IHD, hypertension, diabetes, AF, NYHA, place of care and EF status.

516x193mm (118 x 118 DPI)



Figure 3. HF-medication prescription rates at discharge, according to comorbid respiratory disease status

1291x645mm (118 x 118 DPI)

## Supplemental Material

### Supplemental Methods

#### Data source

The NHFA was established in 2007 for hospitals in England-Wales to assess the quality of care and outcomes of hospitalised patients with a HF diagnosis in the first position at death or discharge, identified using ICD-10 codes (**Supplementary Table 1**). Admissions coded in the audit are compared to HF episodes in the Hospital Episode Statistics (HES) in England and the Patient Episode Database of Wales (PEDW) to determine the case ascertainment rate. The number of participating NHS trusts fluctuated from 145 in 2012–13 (97%) to 136 (82%) in 2017/2018. This corresponds to an increase from capturing 60% of national HF admissions in 2012, to 76% at the end of April 2018. Data are entered into the audit by hospital staff, using case ascertainment forms and data are categorised as mandatory (main indicators such as HF treatments, comorbidities, echocardiography) or non-mandatory (i.e., smoking status, pulmonary oedema, ethnicity). Since non-mandatory data elements are not expected to be included, there are considerable proportions of missing data across these variables (**Supplementary Table 2**). Some mandatory variables also have significant amounts of missing data (e.g., more than 70% missing data on BNP measurements, weight, height). The breadth of variables collected varied throughout the history of the audit, to reflect changes in HF guidelines and quality standards, which evolved over time. For example, haemoglobin and serum creatinine were collected routinely only after 2012<sup>1</sup>.

#### Statistical analysis

The analysis for the main outcome was implemented in a stepwise manner. First, an unconditional model including COPD was considered. In a second step we added asthma. Third, we added an interaction term between COPD and asthma, to assess whether both diagnoses had a significant contribution to the model. In lack of statistical significance these patients were not considered in further analyses. We then evaluated effect modification by EF status (HF<sub>r</sub>EF/HF<sub>p</sub>EF) by including separately an interaction term between COPD and EF, then asthma and EF.

#### *Handling of missing data*

#### **Sensitivity analysis – missing data imputation**

1  
2  
3 While the proportions of missing data (see above) were considerable, we deemed necessary to investigate further two important  
4 factors: “smoking status” and “Body Mass Index (BMI)”. In particular, we were interested in assessing whether COPD has an  
5 independent association with death in patients with HF, when controlling for smoking status, or whether the relationship is  
6 influenced by this factor.  
7  
8

9 We assumed data on smoking and BMI to be missing at random in our cohort, as the distribution in observed cases was similar to  
10 other UK cohorts of patients with HF<sup>23</sup>. We then used a multi-level approach<sup>4</sup> which takes into consideration the hierarchical data  
11 structure, clustered at hospital level. A Gibbs sampling procedure was used to generate 20 imputed data sets after a burn-in of 1000  
12 iterations.  
13  
14  
15  
16  
17  
18  
19  
20  
21  
22  
23  
24  
25  
26  
27  
28  
29  
30  
31  
32  
33  
34  
35  
36  
37  
38  
39  
40  
41  
42  
43  
44  
45  
46  
47

1  
2  
3  
4  
5  
6  
7  
8  
9  
10  
11  
12  
13  
14  
15  
16  
17  
18  
19  
20  
21  
22  
23  
24  
25  
26  
27  
28  
29  
30  
31  
32  
33  
34  
35  
36  
37  
38  
39  
40  
41  
42  
43  
44  
45  
46  
47

**Table 1.** Inclusion criteria for National Heart Failure Audit

| ICD-10 code                                                                           | Diagnosis                                                  |
|---------------------------------------------------------------------------------------|------------------------------------------------------------|
| I11.0                                                                                 | Hypertensive heart disease with (congestive) heart failure |
| I25.5                                                                                 | Ischaemic cardiomyopathy                                   |
| I42.0                                                                                 | Dilated cardiomyopathy                                     |
| I42.9                                                                                 | Cardiomyopathy, unspecified                                |
| I50.0                                                                                 | Congestive heart failure                                   |
| I50.1                                                                                 | Left ventricular failure                                   |
| I50.9                                                                                 | Heart failure, unspecified                                 |
| ICD= International Statistical Classification of Diseases and Related Health Problems |                                                            |

**Table 2.** Comorbidity definitions, according to NHFA dataset<sup>1</sup>, variables recorded from patient history

|                                 |                                                                                                                                                                                                                             |
|---------------------------------|-----------------------------------------------------------------------------------------------------------------------------------------------------------------------------------------------------------------------------|
| <b>COPD</b>                     | History of COPD - chronic bronchitis, emphysema or their cooccurrence. Must be indicated by pulmonary function testing evidence .ie FEV1<75% predicted value or use of beta agonist/steroid inhalers.                       |
| <b>Asthma</b>                   | History of childhood asthma and atopy, or asthma confirmed by respiratory physician for adult onset.                                                                                                                        |
| <b>Diabetes</b>                 | Diagnosis of diabetes prior to admission. This includes a confirmed diagnosis of diabetes and/or the use of an oral hypoglycaemic agent or insulin, and/or a fasting blood glucose >6.7, and/or a random blood glucose >11. |
| <b>Hypertension</b>             | Recorded Blood Pressure >140/90 on at least two occasions prior to admission, or already receiving treatment (drug, dietary or lifestyle) for hypertension                                                                  |
| <b>Ischemic heart disease</b>   | History of myocardial infarction, angina, ECG evidence of MI, CABG or angiogram documenting coronary artery disease.                                                                                                        |
| <b>Cerebrovascular accident</b> | A past neurological deficit of cerebrovascular cause, including episodes that persist beyond 24 hours and transient ischaemic attacks lasting less than 24 hours.                                                           |
| <b>Atrial fibrillation</b>      | An ECG was performed showing atrial fibrillation.                                                                                                                                                                           |
| <b>Valve disease</b>            | History of clinically diagnosed valve disease, moderate or severe stenosis or regurgitation on imaging, or an operative valve replacement/repair                                                                            |

<sup>1</sup> Available: <https://www.nicor.org.uk/national-cardiac-audit-programme/datasets/>

**Table 3.** Model building - association between COPD, asthma (including interaction with ejection fraction group) and in-hospital death in patients hospitalised for heart failure.

| Predictors                                              | Model 1                      | Model 2                        | Model 3                                            | Model 4                                    | Model 5a                               | Model 5b                                   | Model 6                                   |
|---------------------------------------------------------|------------------------------|--------------------------------|----------------------------------------------------|--------------------------------------------|----------------------------------------|--------------------------------------------|-------------------------------------------|
| <b>Fixed effects<br/>[coefficient<br/>estimate, SE]</b> |                              |                                |                                                    |                                            |                                        |                                            |                                           |
| <b>COPD</b>                                             | 0.064<br>[0.017,<br>p<0.001] | 0.0706<br>[0.0174,<br>p<0.001] | 0.060<br>[0.018,<br>p<0.001]                       | -0.0445<br>[0.0256,<br>p=0.081]            | 0.064 [0.017,<br>p<0.001]              | -0.029<br>[0.0242,<br>p=0.232]             | 0.0468 [0.026,<br>p=0.081]                |
| Asthma                                                  | -                            | -0.263<br>[0.0255,<br>p<0.001] | -0.287<br>[0.029,<br>p<0.001]                      | -0.302 [0.040,<br>p<0.001]                 | -0.2719<br>[0.034,<br>p<0.001]         | -0.266<br>[0.0255,<br>p<0.001]             | -0.179 [0.028,<br>p<0.001]                |
| COPD*Asthma                                             | -                            | -                              | <b>0.098</b><br><b>[0.0573,</b><br><b>p=0.087]</b> | 0.149 [0.076,<br>p=0.051]                  | -                                      | -                                          | -                                         |
| EF                                                      | -                            | -                              | -                                                  | -0.208 [0.015,<br>p<0.001]                 | -0.173 [0.014,<br>p<0.001]             | -0.207<br>[0.0149,<br>p<0.001]             | 0.0410 [0.017,<br>p<0.05]                 |
| COPD *EF                                                | -                            | -                              | -                                                  | <b>0.205 [0.036,</b><br><b>p&lt;0.001]</b> | -                                      | <b>0.195 [0.034,</b><br><b>p&lt;0.001]</b> | <b>0.096 [0.037,</b><br><b>p&lt;0.05]</b> |
| Asthma*EF                                               | -                            | -                              | -                                                  | <b>0.018 [0.058,</b><br><b>p=0.753]</b>    | <b>0.013 [0.05,</b><br><b>p=0.797]</b> | -                                          | -                                         |
| COPD*Asthma*EF                                          | -                            | -                              | -                                                  | <b>-0.093 [0.112,</b><br><b>p=0.402]</b>   | -                                      | -                                          | -                                         |
| Age                                                     | -                            | -                              | -                                                  | -                                          | -                                      | -                                          | 0.553 [0.0101,<br>p<0.001]                |
| Female (vs. male)                                       | -                            | -                              | -                                                  | -                                          | -                                      | -                                          | -0.0922 [0.0150,<br>p<0.001]              |

|                                                                                                                                                                                                                                                                                     |          |          |          |          |          |          |                           |
|-------------------------------------------------------------------------------------------------------------------------------------------------------------------------------------------------------------------------------------------------------------------------------------|----------|----------|----------|----------|----------|----------|---------------------------|
| Valve disease                                                                                                                                                                                                                                                                       | -        | -        | -        | -        | -        | -        | 0.219 [0.0169, p<0.001]   |
| IHD                                                                                                                                                                                                                                                                                 | -        | -        | -        | -        | -        | -        | 0.1204 [0.015, p<0.001]   |
| Hypertension                                                                                                                                                                                                                                                                        | -        | -        | -        | -        | -        | -        | -0.220 [0.0148, p<0.001]  |
| Diabetes                                                                                                                                                                                                                                                                            | -        | -        | -        | -        | -        | -        | 0.0489 [0.0164, p<0.01]   |
| AF                                                                                                                                                                                                                                                                                  | -        | -        | -        | -        | -        | -        | -0.0056 [0.0147, p=0.703] |
| NYHA                                                                                                                                                                                                                                                                                | -        | -        | -        | -        | -        | -        | 0.116 [0.018, p<0.001]    |
| Place of care (cardiology vs not cardiology)                                                                                                                                                                                                                                        | -        | -        | -        | -        | -        | -        | -0.363 [0.0168, p<0.001]  |
| <b>Random effects (hospitals, n=219)</b>                                                                                                                                                                                                                                            |          |          |          |          |          |          |                           |
| Variance                                                                                                                                                                                                                                                                            | 0.205    | 0.208    | 0.208    | 0.201    | 0.201    | 0.201    | 0.159                     |
| SD                                                                                                                                                                                                                                                                                  | 0.453    | 0.456    | 0.456    | 0.448    | 0.449    | 0.449    | 0.399                     |
| AIC                                                                                                                                                                                                                                                                                 | 160533.4 | 158837.1 | 158836.2 | 158652.0 | 158681.2 | 158649.7 | 133038.5                  |
| Abbreviations<br>AIC= Akaike information criterion; AF= atrial fibrillation; COPD= chronic obstructive pulmonary disease; CI=confidence intervals; EF= ejection fraction; NYHA= New York Heart Association; IHD= ischemic heart disease; SD= standard deviation; SE= standard error |          |          |          |          |          |          |                           |

Results from a 2-level unconditional model that included COPD as fixed-effect and hospital as random effect suggested COPD was associated with an increase in the estimate for in-hospital mortality. The addition of asthma to this model indicated it had an inverse relationship with likelihood of death. A test for the interaction between COPD and asthma was not significant, thus, it was not considered in subsequent analyses. Further, we wanted to assess whether the effects of COPD, respectively asthma on in-hospital death are different with respect to EF status group therefore, we added a three-way interaction between COPD, asthma and EF to the model. We detected a significant interaction between COPD and EF only, suggesting the effect of COPD only, not asthma would



1  
2  
3 be differential according to the EF status. In the final model, we estimated the association between COPD and mortality in HF<sub>r</sub>EF and  
4 in HF<sub>p</sub>EF and adjusted for baseline covariates.  
5  
6  
7  
8  
9  
10  
11  
12  
13  
14  
15  
16  
17  
18  
19  
20  
21  
22  
23  
24  
25  
26  
27  
28  
29  
30  
31  
32  
33  
34  
35  
36  
37  
38  
39  
40  
41  
42  
43  
44  
45  
46  
47

For peer review only

**Table 4.** Association between COPD, asthma and in-hospital death

| Predictors                                                                                                                                                           | COPD only (95% CI)        | COPD + asthma             | Fully adjusted model      | Model with COPD and EF interaction, fully adjusted OR (95% CI) |
|----------------------------------------------------------------------------------------------------------------------------------------------------------------------|---------------------------|---------------------------|---------------------------|----------------------------------------------------------------|
| <b>Fixed effects (95% CI)</b>                                                                                                                                        |                           |                           |                           | P-value for interaction =0.01                                  |
| COPD                                                                                                                                                                 | <b>1.07 (1.03 – 1.10)</b> | <b>1.07 (1.04-1.11)</b>   | <b>1.10 (1.06 – 1.14)</b> | 1.04 (0.99-1.10)                                               |
| Asthma                                                                                                                                                               | -                         | <b>0.77 (0.73 – 0.80)</b> | <b>0.84 (0.79, 0.88)</b>  | 0.83 (0.79-0.88)                                               |
| COPD (Yes vs. No): HFpEF                                                                                                                                             | -                         | -                         | -                         | <b>1.05 (0.99 – 1.10)</b>                                      |
| COPD (Yes vs. No): HFrEF                                                                                                                                             | -                         | -                         | -                         | <b>1.15 (1.09 – 1.21)</b>                                      |
| Age                                                                                                                                                                  | -                         |                           | 1.74 (1.71 -1.78)         | 1.74 (1.71-1.77)                                               |
| Female (vs. male)                                                                                                                                                    | -                         |                           | 0.91 (0.89-0.94)          | 0.91 (0.89-0.94)                                               |
| Valve disease                                                                                                                                                        | -                         |                           | 1.25 (1.20-1.29)          | 1.25 (1.20-1.29)                                               |
| IHD                                                                                                                                                                  | -                         |                           | 1.12 (1.10-1.16)          | 1.13 (1.10-1.16)                                               |
| Hypertension                                                                                                                                                         | -                         |                           | 0.8 (0.78-0.83)           | 0.80 (0.78-0.83)                                               |
| Diabetes                                                                                                                                                             | -                         |                           | 1.05 (1.02-1.08)          | 1.05 (1.02-1.08)                                               |
| AF                                                                                                                                                                   | -                         |                           | 0.99 (0.97-1.02)          | 0.99 (0.96-1.02)                                               |
| NYHA (III/IV vs. I/II)                                                                                                                                               | -                         |                           | 1.12 (1.08-1.17)          | 1.12 (1.08-1.17)                                               |
| Place of care (cardiology vs. not cardiology ward)                                                                                                                   | -                         |                           | 0.69 (0.67-0.72)          | 0.69 (0.67-0.71)                                               |
| <i>Random effects (Variance)</i>                                                                                                                                     |                           |                           |                           |                                                                |
| <i>LR test p-value</i>                                                                                                                                               | P<0.001                   | P<0.001                   | P<0.001                   | P<0.001                                                        |
| Likelihood ratio test comparing fixed to random effects for hospital model fit, significant indicates random effects model performed better than fixed effects model |                           |                           |                           |                                                                |
| Abbreviations                                                                                                                                                        |                           |                           |                           |                                                                |

1  
2  
3 AF= atrial fibrillation; COPD= chronic obstructive pulmonary disease; CI=confidence intervals; EF= ejection fraction; LR= Likelihood ratio test; NYHA= New  
4 York Heart Association; IHD= ischemic heart disease; SD= standard deviation.  
5  
6  
7  
8  
9  
10  
11  
12  
13  
14  
15  
16  
17  
18  
19  
20  
21  
22  
23  
24  
25  
26  
27  
28  
29  
30  
31  
32  
33  
34  
35  
36  
37  
38  
39  
40  
41  
42  
43  
44  
45  
46  
47

For peer review only

**Table 5.** Association between COPD and in-hospital mortality in patients hospitalised with heart failure. Results from 20 models using imputed smoking status and BMI (estimates combined using Rubin's rule).

|                                                                                                                                                                                                                                                             | Fully adjusted model, OR (95% CI) |
|-------------------------------------------------------------------------------------------------------------------------------------------------------------------------------------------------------------------------------------------------------------|-----------------------------------|
| <b>Fixed effects (95% CI)</b>                                                                                                                                                                                                                               |                                   |
| COPD                                                                                                                                                                                                                                                        | 1.12 (1.07 – 1.17)                |
| Asthma                                                                                                                                                                                                                                                      | 0.84 (0.80 – 0.90)                |
| Age                                                                                                                                                                                                                                                         | 1.67 (1.62 – 1.71)                |
| Female (vs. male)                                                                                                                                                                                                                                           | 0.89 (0.86 – 0.92)                |
| Valve disease                                                                                                                                                                                                                                               | 1.22 (1.18 – 1.26)                |
| IHD                                                                                                                                                                                                                                                         | 1.13 (1.10 – 1.17)                |
| Hypertension                                                                                                                                                                                                                                                | 0.82 (0.89 – 0.85)                |
| Diabetes                                                                                                                                                                                                                                                    | 1.12 (1.08 – 1.15)                |
| AF                                                                                                                                                                                                                                                          | 1.01 (0.98 – 1.04)                |
| NYHA (III/IV vs. I/II)                                                                                                                                                                                                                                      | 1.15 (1.10 – 1.20)                |
| Place of care (cardiology vs. no cardiology ward)                                                                                                                                                                                                           | 0.70 (0.69 – 0.73)                |
| EF                                                                                                                                                                                                                                                          | 1.03 (0.99 – 1.06)                |
| <i>Smoking status (ref: Current smoker)</i>                                                                                                                                                                                                                 |                                   |
| Ex-smoker                                                                                                                                                                                                                                                   | 0.90 (0.77 – 1.06)                |
| Never                                                                                                                                                                                                                                                       | 1 (0.84 – 1.19)                   |
| <i>BMI (ref: normal weight)</i>                                                                                                                                                                                                                             |                                   |
| Underweight                                                                                                                                                                                                                                                 | 1.31 (1.21 – 1.43)                |
| Overweight                                                                                                                                                                                                                                                  | 0.86 (0.81 – 0.91)                |
| Obese                                                                                                                                                                                                                                                       | 0.77 (0.73 – 0.81)                |
| <i>Random effects (Variance)</i>                                                                                                                                                                                                                            |                                   |
| <i>LR test p-value</i>                                                                                                                                                                                                                                      | P<0.001                           |
| Abbreviations<br>AF= atrial fibrillation; BMI= Body Mass index; CI= confidence intervals; COPD= chronic obstructive pulmonary disease; EF= ejection fraction; IHD= ischemic heart disease; NYHA= New York Heart Association; OR= Odds ratio; ref= reference |                                   |

1  
2  
3  
4  
5  
6  
7  
8  
9  
10  
11  
12  
13  
14  
15  
16  
17  
18  
19  
20  
21  
22  
23  
24  
25  
26  
27  
28  
29  
30  
31  
32  
33  
34  
35  
36  
37  
38  
39  
40  
41  
42  
43  
44  
45  
46  
47

**Table 6.** Association between COPD and in-hospital mortality in patients hospitalised with a confirmed diagnosis of HF.

|                                                                                                                                                                                                                                                                                        | Fully adjusted model, OR (95% CI) |
|----------------------------------------------------------------------------------------------------------------------------------------------------------------------------------------------------------------------------------------------------------------------------------------|-----------------------------------|
| <b>Fixed effects (95% CI)</b>                                                                                                                                                                                                                                                          |                                   |
| COPD                                                                                                                                                                                                                                                                                   | 1.11 (1.07 - 1.16)                |
| Asthma                                                                                                                                                                                                                                                                                 | 0.84 (0.79 - 0.89)                |
| Age                                                                                                                                                                                                                                                                                    | 1.04 (1.04 - 1.05)                |
| Female (vs. male)                                                                                                                                                                                                                                                                      | 0.91 (0.88 - 0.94)                |
| Valve disease                                                                                                                                                                                                                                                                          | 1.26 (1.22 - 1.30)                |
| IHD                                                                                                                                                                                                                                                                                    | 1.15 (1.11 - 1.18)                |
| Hypertension                                                                                                                                                                                                                                                                           | 0.81 (0.79 - 0.84)                |
| Diabetes                                                                                                                                                                                                                                                                               | 1.06 (1.03 - 1.10)                |
| AF                                                                                                                                                                                                                                                                                     | 0.98 (0.95 - 1.01)                |
| NYHA (III/IV vs. I/II)                                                                                                                                                                                                                                                                 | 1.13 (1.08 - 1.18)                |
| Place of care (cardiology vs. no cardiology ward)                                                                                                                                                                                                                                      | 0.69 (0.66 - 0.71)                |
| EF                                                                                                                                                                                                                                                                                     | 1.04 (1.01 - 1.08)                |
| <i>Random effects (Variance)</i>                                                                                                                                                                                                                                                       | 0.166                             |
| <i>LR test p-value</i>                                                                                                                                                                                                                                                                 | p<0.001                           |
| Abbreviations<br>AF= atrial fibrillation; BMI= Body Mass index; CI= confidence intervals; COPD= chronic obstructive pulmonary disease; EF= ejection fraction; IHD= ischemic heart disease; LR= Likelihood ratio test; NYHA= New York Heart Association; OR= Odds ratio; ref= reference |                                   |

**Table 7.** Variables with considerable missingness in the National Heart Failure Audit 2012-2018

|                                       | <b>HF alone<br/>(N=170297)</b> | <b>COPD + HF<br/>(N=32695)</b> | <b>Asthma + HF<br/>(N=14400)</b> | <b>Overall<br/>(N=217392)</b> |
|---------------------------------------|--------------------------------|--------------------------------|----------------------------------|-------------------------------|
| <b>Cerebrovascular accident</b>       | 2882 (1.7%)                    | 582 (1.8%)                     | 244 (1.7%)                       | 3708 (1.7%)                   |
| Missing                               | 145636 (85.5%)                 | 28115 (86.0%)                  | 12279 (85.3%)                    | 186030 (85.6%)                |
| <b>Alcohol units/week</b>             |                                |                                |                                  |                               |
| Median [Q1, Q3]                       | 0 [0, 1.00]                    | 0 [0, 2.00]                    | 0 [0, 0]                         | 0 [0, 1.00]                   |
| Missing                               | 159233 (93.5%)                 | 30570 (93.5%)                  | 13314 (92.5%)                    | 203117 (93.4%)                |
| <b>Smoking status</b>                 |                                |                                |                                  |                               |
| Current smoker                        | 1869 (1.1%)                    | 911 (2.8%)                     | 143 (1.0%)                       | 2923 (1.3%)                   |
| Ex-smoker                             | 8371 (4.9%)                    | 2505 (7.7%)                    | 715 (5.0%)                       | 11591 (5.3%)                  |
| Never-smoker                          | 8823 (5.2%)                    | 673 (2.1%)                     | 896 (6.2%)                       | 10392 (4.8%)                  |
| Missing                               | 151234 (88.8%)                 | 28606 (87.5%)                  | 12646 (87.8%)                    | 192486 (88.5%)                |
| <b>Chest X-ray (pulmonary oedema)</b> | 3954 (2.3%)                    | 692 (2.1%)                     | 334 (2.3%)                       | 4980 (2.3%)                   |
| Missing                               | 157253 (92.3%)                 | 30528 (93.4%)                  | 13311 (92.4%)                    | 201092 (92.5%)                |
| <b>Medications at admission</b>       |                                |                                |                                  |                               |
| <b>ACEi</b>                           | 6316 (3.7%)                    | 1116 (3.4%)                    | 513 (3.6%)                       | 7945 (3.7%)                   |
| Contraindicated                       | 592 (0.3%)                     | 140 (0.4%)                     | 59 (0.4%)                        | 791 (0.4%)                    |
| Missing                               | 152642 (89.6%)                 | 29598 (90.5%)                  | 12903 (89.6%)                    | 195143 (89.8%)                |
| <b>ARB</b>                            | 2392 (1.4%)                    | 453 (1.4%)                     | 305 (2.1%)                       | 3150 (1.4%)                   |
| Not applicable                        | 2570 (1.5%)                    | 513 (1.6%)                     | 240 (1.7%)                       | 3323 (1.5%)                   |
| Stopped                               | 0 (0%)                         | 0 (0%)                         | 0 (0%)                           | 0 (0%)                        |
| Contraindicated                       | 338 (0.2%)                     | 88 (0.3%)                      | 32 (0.2%)                        | 458 (0.2%)                    |
| Missing                               | 151870 (89.2%)                 | 29463 (90.1%)                  | 12781 (88.8%)                    | 194114 (89.3%)                |
| <b>Beta-blocker</b>                   | 9516 (5.6%)                    | 1446 (4.4%)                    | 598 (4.2%)                       | 11560 (5.3%)                  |
| Not applicable                        | 762 (0.4%)                     | 144 (0.4%)                     | 88 (0.6%)                        | 994 (0.5%)                    |
| Contraindicated                       | 153 (0.1%)                     | 136 (0.4%)                     | 74 (0.5%)                        | 363 (0.2%)                    |
| Missing                               | 151820 (89.2%)                 | 29481 (90.2%)                  | 12831 (89.1%)                    | 194132 (89.3%)                |
| <b>Loop diuretic</b>                  | 5519 (3.2%)                    | 1202 (3.7%)                    | 490 (3.4%)                       | 7211 (3.3%)                   |

|                                                                                                                                                                                                                                 |                   |                   |                   |                   |
|---------------------------------------------------------------------------------------------------------------------------------------------------------------------------------------------------------------------------------|-------------------|-------------------|-------------------|-------------------|
| Missing                                                                                                                                                                                                                         | 160255 (94.1%)    | 30820 (94.3%)     | 13532 (94.0%)     | 204607 (94.1%)    |
| <b>Thiazide or Metolazone</b>                                                                                                                                                                                                   | 925 (0.5%)        | 140 (0.4%)        | 81 (0.6%)         | 1146 (0.5%)       |
| Stopped*                                                                                                                                                                                                                        | -                 | -                 | -                 | -                 |
| Missing                                                                                                                                                                                                                         | 152559 (89.6%)    | 29604 (90.5%)     | 12891 (89.5%)     | 195054 (89.7%)    |
| <b>MRA</b>                                                                                                                                                                                                                      | 2356 (1.4%)       | 502 (1.5%)        | 221 (1.5%)        | 3079 (1.4%)       |
| Not applicable                                                                                                                                                                                                                  | 225 (0.1%)        | 45 (0.1%)         | 27 (0.2%)         | 297 (0.1%)        |
| Contraindicated                                                                                                                                                                                                                 | 36 (0.0%)         | *                 | *                 | 42 (0.0%)         |
| Missing                                                                                                                                                                                                                         | 152494 (89.5%)    | 29570 (90.4%)     | 12885 (89.5%)     | 194949 (89.7%)    |
| <b>Digoxin</b>                                                                                                                                                                                                                  | 1700 (1.0%)       | 399 (1.2%)        | 168 (1.2%)        | 2267 (1.0%)       |
| Missing                                                                                                                                                                                                                         | 152631 (89.6%)    | 29622 (90.6%)     | 12874 (89.4%)     | 195127 (89.8%)    |
| CCB                                                                                                                                                                                                                             | 2847 (1.7%)       | 479 (1.5%)        | 280 (1.9%)        | 3606 (1.7%)       |
| Missing                                                                                                                                                                                                                         | 155279 (91.2%)    | 30261 (92.6%)     | 13150 (91.3%)     | 198690 (91.4%)    |
| <b>Bronchodilators</b>                                                                                                                                                                                                          | 919 (0.5%)        | 1390 (4.3%)       | 750 (5.2%)        | 3059 (1.4%)       |
| Missing                                                                                                                                                                                                                         | 155316 (91.2%)    | 30248 (92.5%)     | 13136 (91.2%)     | 198700 (91.4%)    |
| <b>Ivabradine</b>                                                                                                                                                                                                               | 186 (0.1%)        | 64 (0.2%)         | 31 (0.2%)         | 281 (0.1%)        |
| Missing                                                                                                                                                                                                                         | 153320 (90%)      | 29666 (90.7%)     | 12845 (89.2%)     | 195831 (90.1%)    |
| <b>BMI</b>                                                                                                                                                                                                                      |                   |                   |                   |                   |
| Median [Q1, Q3]                                                                                                                                                                                                                 | 26.5 [22.9, 31.1] | 27.1 [22.8, 32.2] | 28.0 [23.6, 33.7] | 26.7 [22.9, 31.4] |
| Missing                                                                                                                                                                                                                         | 125287 (73.6%)    | 23693 (72.5%)     | 10274 (71.3%)     | 159254 (73.3%)    |
| <b>BNP</b>                                                                                                                                                                                                                      |                   |                   |                   |                   |
| Median [Q1, Q3]                                                                                                                                                                                                                 | 428 [1.00, 1100]  | 350 [1.00, 985]   | 353 [1.00, 871]   | 412 [1.00, 1070]  |
| Missing                                                                                                                                                                                                                         | 153043 (89.9%)    | 29385 (89.9%)     | 12978 (90.1%)     | 195406 (89.9%)    |
| <b>NT_proBNP</b>                                                                                                                                                                                                                |                   |                   |                   |                   |
| Median [Q1, Q3]                                                                                                                                                                                                                 | 2790 [404, 7530]  | 2490 [349, 6820]  | 2440 [426, 6330]  | 2700 [393, 7320]  |
| Missing                                                                                                                                                                                                                         | 153022 (89.9%)    | 29161 (89.2%)     | 12818 (89.0%)     | 195001 (89.7%)    |
| *not shown due to small numbers policy                                                                                                                                                                                          |                   |                   |                   |                   |
| ACEi= angiotensin-converting-enzyme inhibitors; ARB= angiotensin receptor blockers; BMI= Body mass index; BNP= brain natriuretic peptide; NT_proBNP= N-terminal (NT)-pro hormone BNP; MRA=mineralocorticoid receptor antagonist |                   |                   |                   |                   |

**Figure 1.** Study flow

HF= heart failure; COPD=chronic obstructive pulmonary disease





### Supplemental references

1. Shoaib A, Mamas MA, Ahmad QS, et al. Characteristics and outcome of acute heart failure patients according to the severity of peripheral oedema. *Int J Cardiol* 2019;285:40-46. doi: 10.1016/j.ijcard.2019.03.020 [published Online First: 2019/03/25]
2. Conrad N, Judge A, Tran J, et al. Temporal trends and patterns in heart failure incidence: a population-based study of 4 million individuals. *The Lancet* 2018;391(10120):572-80. doi: 10.1016/s0140-6736(17)32520-5
3. Lawson CA, Mamas MA, Jones PW, et al. Association of Medication Intensity and Stages of Airflow Limitation With the Risk of Hospitalization or Death in Patients With Heart Failure and Chronic Obstructive Pulmonary Disease. *JAMA Netw Open* 2018;1(8):e185489. doi: 10.1001/jamanetworkopen.2018.5489 [published Online First: 2019/01/16]
4. Quartagno M, Grund S, and Carpenter J. Jomo: a flexible package for two-level joint modelling multiple imputation. *R Journal* 2019;9.1

**STROBE 2007 (v4) checklist of items to be included in reports of observational studies in epidemiology\***  
**Checklist for cohort, case-control, and cross-sectional studies (combined)**

| Section/Topic             | Item # | Recommendation                                                                                                                                                                                                                                                                                                                                                                                                                                                         | Reported on page #  |
|---------------------------|--------|------------------------------------------------------------------------------------------------------------------------------------------------------------------------------------------------------------------------------------------------------------------------------------------------------------------------------------------------------------------------------------------------------------------------------------------------------------------------|---------------------|
| Title and abstract        | 1      | (a) Indicate the study's design with a commonly used term in the title or the abstract                                                                                                                                                                                                                                                                                                                                                                                 | 3                   |
|                           |        | (b) Provide in the abstract an informative and balanced summary of what was done and what was found                                                                                                                                                                                                                                                                                                                                                                    | 2,3                 |
| <b>Introduction</b>       |        |                                                                                                                                                                                                                                                                                                                                                                                                                                                                        |                     |
| Background/rationale      | 2      | Explain the scientific background and rationale for the investigation being reported                                                                                                                                                                                                                                                                                                                                                                                   | 5,6                 |
| Objectives                | 3      | State specific objectives, including any pre-specified hypotheses                                                                                                                                                                                                                                                                                                                                                                                                      | 5,6                 |
| <b>Methods</b>            |        |                                                                                                                                                                                                                                                                                                                                                                                                                                                                        |                     |
| Study design              | 4      | Present key elements of study design early in the paper                                                                                                                                                                                                                                                                                                                                                                                                                | 6                   |
| Setting                   | 5      | Describe the setting, locations, and relevant dates, including periods of recruitment, exposure, follow-up, and data collection                                                                                                                                                                                                                                                                                                                                        | 6, 7, Supplement    |
| Participants              | 6      | (a) <i>Cohort study</i> —Give the eligibility criteria, and the sources and methods of selection of participants. Describe methods of follow-up<br><i>Case-control study</i> —Give the eligibility criteria, and the sources and methods of case ascertainment and control selection. Give the rationale for the choice of cases and controls<br><i>Cross-sectional study</i> —Give the eligibility criteria, and the sources and methods of selection of participants | 6, 7, Supplement    |
|                           |        | (b) <i>Cohort study</i> —For matched studies, give matching criteria and number of exposed and unexposed<br><i>Case-control study</i> —For matched studies, give matching criteria and the number of controls per case                                                                                                                                                                                                                                                 |                     |
| Variables                 | 7      | Clearly define all outcomes, exposures, predictors, potential confounders, and effect modifiers. Give diagnostic criteria, if applicable                                                                                                                                                                                                                                                                                                                               | 7, 8, Supplement    |
| Data sources/ measurement | 8*     | For each variable of interest, give sources of data and details of methods of assessment (measurement). Describe comparability of assessment methods if there is more than one group                                                                                                                                                                                                                                                                                   | 6, 7, Supplement    |
| Bias                      | 9      | Describe any efforts to address potential sources of bias                                                                                                                                                                                                                                                                                                                                                                                                              | 7, 8, 9, Supplement |
| Study size                | 10     | Explain how the study size was arrived at                                                                                                                                                                                                                                                                                                                                                                                                                              |                     |
| Quantitative variables    | 11     | Explain how quantitative variables were handled in the analyses. If applicable, describe which groupings were chosen and why                                                                                                                                                                                                                                                                                                                                           | 8, 9                |
| Statistical methods       | 12     | (a) Describe all statistical methods, including those used to control for confounding                                                                                                                                                                                                                                                                                                                                                                                  | 8,9, Supplement     |
|                           |        | (b) Describe any methods used to examine subgroups and interactions                                                                                                                                                                                                                                                                                                                                                                                                    | 8,9, Supplement     |
|                           |        | (c) Explain how missing data were addressed                                                                                                                                                                                                                                                                                                                                                                                                                            | 9, Supplement       |
|                           |        | (d) <i>Cohort study</i> —If applicable, explain how loss to follow-up was addressed<br><i>Case-control study</i> —If applicable, explain how matching of cases and controls was addressed                                                                                                                                                                                                                                                                              | 6                   |

|                          |     |                                                                                                                                                                                                              |                          |
|--------------------------|-----|--------------------------------------------------------------------------------------------------------------------------------------------------------------------------------------------------------------|--------------------------|
|                          |     | <i>Cross-sectional study</i> —If applicable, describe analytical methods taking account of sampling strategy                                                                                                 |                          |
|                          |     | (e) Describe any sensitivity analyses                                                                                                                                                                        | 9, Supplement            |
| <b>Results</b>           |     |                                                                                                                                                                                                              |                          |
| Participants             | 13* | (a) Report numbers of individuals at each stage of study—eg numbers potentially eligible, examined for eligibility, confirmed eligible, included in the study, completing follow-up, and analysed            | 6, Supplement flow chart |
|                          |     | (b) Give reasons for non-participation at each stage                                                                                                                                                         | Supplement flow chart    |
|                          |     | (c) Consider use of a flow diagram                                                                                                                                                                           | Supplement flow chart    |
| Descriptive data         | 14* | (a) Give characteristics of study participants (eg demographic, clinical, social) and information on exposures and potential confounders                                                                     | 9, 10                    |
|                          |     | (b) Indicate number of participants with missing data for each variable of interest                                                                                                                          | 20-22, Supplement        |
|                          |     | (c) <i>Cohort study</i> —Summarise follow-up time (eg, average and total amount)                                                                                                                             |                          |
| Outcome data             | 15* | <i>Cohort study</i> —Report numbers of outcome events or summary measures over time                                                                                                                          |                          |
|                          |     | <i>Case-control study</i> —Report numbers in each exposure category, or summary measures of exposure                                                                                                         |                          |
|                          |     | <i>Cross-sectional study</i> —Report numbers of outcome events or summary measures                                                                                                                           | 10-12                    |
| Main results             | 16  | (a) Give unadjusted estimates and, if applicable, confounder-adjusted estimates and their precision (eg, 95% confidence interval). Make clear which confounders were adjusted for and why they were included | 23, Supplement           |
|                          |     | (b) Report category boundaries when continuous variables were categorized                                                                                                                                    | 9, 20-22                 |
|                          |     | (c) If relevant, consider translating estimates of relative risk into absolute risk for a meaningful time period                                                                                             |                          |
| Other analyses           | 17  | Report other analyses done—eg analyses of subgroups and interactions, and sensitivity analyses                                                                                                               | 10, Supplement           |
| <b>Discussion</b>        |     |                                                                                                                                                                                                              |                          |
| Key results              | 18  | Summarise key results with reference to study objectives                                                                                                                                                     | 12-16                    |
| Limitations              | 19  | Discuss limitations of the study, taking into account sources of potential bias or imprecision. Discuss both direction and magnitude of any potential bias                                                   | 17                       |
| Interpretation           | 20  | Give a cautious overall interpretation of results considering objectives, limitations, multiplicity of analyses, results from similar studies, and other relevant evidence                                   | 18                       |
| Generalisability         | 21  | Discuss the generalisability (external validity) of the study results                                                                                                                                        | 18                       |
| <b>Other information</b> |     |                                                                                                                                                                                                              |                          |
| Funding                  | 22  | Give the source of funding and the role of the funders for the present study and, if applicable, for the original study on which the present article is based                                                | 19                       |

\*Give information separately for cases and controls in case-control studies and, if applicable, for exposed and unexposed groups in cohort and cross-sectional studies.

1  
2 **Note:** An Explanation and Elaboration article discusses each checklist item and gives methodological background and published examples of transparent reporting. The STROBE  
3 checklist is best used in conjunction with this article (freely available on the Web sites of PLoS Medicine at <http://www.plosmedicine.org/>, Annals of Internal Medicine at  
4 <http://www.annals.org/>, and Epidemiology at <http://www.epidem.com/>). Information on the STROBE Initiative is available at [www.strobe-statement.org](http://www.strobe-statement.org).  
5  
6  
7  
8  
9  
10  
11  
12  
13  
14  
15  
16  
17  
18  
19  
20  
21  
22  
23  
24  
25  
26  
27  
28  
29  
30  
31  
32  
33  
34  
35  
36  
37  
38  
39  
40  
41  
42  
43  
44  
45  
46

For peer review only
