# Supplementary material for: Impact of COPD and asthma on in-hospital mortality and management of patients with heart failure in England and Wales: an observational analysis
Source: PubMed Central journal article supplement — BMJ Open. 2022 Jun 30;12(6):e059122. doi: 10.1136/bmjopen-2021-059122 (PMC9247695; doi:10.1136/bmjopen-2021-059122), 2022-06-30
Supplement: bmjopen-2021-059122supp001.pdf [file bmjopen-2021-059122supp001.pdf]

## Supplemental Material

### Supplemental Methods

#### Data source

The NHFA was established in 2007 for hospitals in England-Wales to assess the quality of care and outcomes of hospitalised patients with a HF diagnosis in the first position at death or discharge, identified using ICD-10 codes (**Supplementary Table 1**). Admissions coded in the audit are compared to HF episodes in the Hospital Episode Statistics (HES) in England and the Patient Episode Database of Wales (PEDW) to determine the case ascertainment rate. The number of participating NHS trusts fluctuated from 145 in 2012–13 (97%) to 136 (82%) in 2017/2018. This corresponds to an increase from capturing 60% of national HF admissions in 2012, to 76% at the end of April 2018. Data are entered into the audit by hospital staff, using case ascertainment forms and data are categorised as mandatory (main indicators such as HF treatments, comorbidities, echocardiography) or non-mandatory (i.e., smoking status, pulmonary oedema, ethnicity). Since non-mandatory data elements are not expected to be included, there are considerable proportions of missing data across these variables (**Supplementary Table 2**). Some mandatory variables also have significant amounts of missing data (e.g., more than 70% missing data on BNP measurements, weight, height). The breadth of variables collected varied throughout the history of the audit, to reflect changes in HF guidelines and quality standards, which evolved over time. For example, haemoglobin and serum creatinine were collected routinely only after 2012<sup>1</sup>.

#### Statistical analysis

The analysis for the main outcome was implemented in a stepwise manner. First, an unconditional model including, COPD was considered. In a second step we added asthma. Third, we added an interaction term between COPD and asthma, to assess whether both diagnoses had a significant contribution to the model. In lack of statistical significance these patients were not considered in further analyses. We then evaluated effect modification by EF status (HF<sub>rEF</sub>/HF<sub>pEF</sub>) by including separately an interaction term between COPD and EF, then asthma and EF.

#### *Handling of missing data*

#### **Sensitivity analysis – missing data imputation**

While the proportions of missing data (see above) were considerable, we deemed necessary to investigate further two important factors: “smoking status” and “Body Mass Index (BMI)”. In particular, we were interested in assessing whether COPD has an independent association with death in patients with HF, when controlling for smoking status, or whether the relationship is influenced by this factor.

We assumed data on smoking and BMI to be missing at random in our cohort, as the distribution in observed cases was similar to other UK cohorts of patients with HF<sup>2 3</sup>. We then used a multi-level approach<sup>4</sup> which takes into consideration the hierarchical data structure, clustered at hospital level. A Gibbs sampling procedure was used to generate 20 imputed data sets after a burn-in of 1000 iterations.

**Table 1.** Inclusion criteria for National Heart Failure Audit

| ICD-10 code                                                                           | Diagnosis                                                  |
|---------------------------------------------------------------------------------------|------------------------------------------------------------|
| I11.0                                                                                 | Hypertensive heart disease with (congestive) heart failure |
| I25.5                                                                                 | Ischaemic cardiomyopathy                                   |
| I42.0                                                                                 | Dilated cardiomyopathy                                     |
| I42.9                                                                                 | Cardiomyopathy, unspecified                                |
| I50.0                                                                                 | Congestive heart failure                                   |
| I50.1                                                                                 | Left ventricular failure                                   |
| I50.9                                                                                 | Heart failure, unspecified                                 |
| ICD= International Statistical Classification of Diseases and Related Health Problems |                                                            |

**Table 2.** Comorbidity definitions, according to NHFA dataset<sup>1</sup>, variables recorded from patient history

|                                 |                                                                                                                                                                                                                             |
|---------------------------------|-----------------------------------------------------------------------------------------------------------------------------------------------------------------------------------------------------------------------------|
| <b>COPD</b>                     | History of COPD - chronic bronchitis, emphysema or their cooccurrence. Must be indicated by pulmonary function testing evidence .ie FEV1<75% predicted value or use of beta agonist/steroid inhalers.                       |
| <b>Asthma</b>                   | History of childhood asthma and atopy, or asthma confirmed by respiratory physician for adult onset.                                                                                                                        |
| <b>Diabetes</b>                 | Diagnosis of diabetes prior to admission. This includes a confirmed diagnosis of diabetes and/or the use of an oral hypoglycaemic agent or insulin, and/or a fasting blood glucose >6.7, and/or a random blood glucose >11. |
| <b>Hypertension</b>             | Recorded Blood Pressure >140/90 on at least two occasions prior to admission, or already receiving treatment (drug, dietary or lifestyle) for hypertension                                                                  |
| <b>Ischemic heart disease</b>   | History of myocardial infarction, angina, ECG evidence of MI, CABG or angiogram documenting coronary artery disease.                                                                                                        |
| <b>Cerebrovascular accident</b> | A past neurological deficit of cerebrovascular cause, including episodes that persist beyond 24 hours and transient ischaemic attacks lasting less than 24 hours.                                                           |
| <b>Atrial fibrillation</b>      | An ECG was performed showing atrial fibrillation.                                                                                                                                                                           |
| <b>Valve disease</b>            | History of clinically diagnosed valve disease, moderate or severe stenosis or regurgitation on imaging, or an operative valve replacement/repair                                                                            |

<sup>1</sup> Available: <https://www.nicor.org.uk/national-cardiac-audit-programme/datasets/>

**Table 3.** Model building - association between COPD, asthma (including interaction with ejection fraction group) and in-hospital death in patients hospitalised for heart failure.

| Predictors                                              | Model 1                      | Model 2                        | Model 3                                            | Model 4                                    | Model 5a                               | Model 5b                                   | Model 6                                   |
|---------------------------------------------------------|------------------------------|--------------------------------|----------------------------------------------------|--------------------------------------------|----------------------------------------|--------------------------------------------|-------------------------------------------|
| <b>Fixed effects<br/>[coefficient<br/>estimate, SE]</b> |                              |                                |                                                    |                                            |                                        |                                            |                                           |
| <b>COPD</b>                                             | 0.064<br>[0.017,<br>p<0.001] | 0.0706<br>[0.0174,<br>p<0.001] | 0.060<br>[0.018,<br>p<0.001]                       | -0.0445<br>[0.0256,<br>p=0.081]            | 0.064 [0.017,<br>p<0.001]              | -0.029<br>[0.0242,<br>p=0.232]             | 0.0468 [0.026,<br>p=0.081]                |
| Asthma                                                  | -                            | -0.263<br>[0.0255,<br>p<0.001] | -0.287<br>[0.029,<br>p<0.001]                      | -0.302 [0.040,<br>p<0.001]                 | -0.2719<br>[0.034,<br>p<0.001]         | -0.266<br>[0.0255,<br>p<0.001]             | -0.179 [0.028,<br>p<0.001]                |
| COPD*Asthma                                             | -                            | -                              | <b>0.098</b><br><b>[0.0573,</b><br><b>p=0.087]</b> | 0.149 [0.076,<br>p=0.051]                  | -                                      | -                                          | -                                         |
| EF                                                      | -                            | -                              | -                                                  | -0.208 [0.015,<br>p<0.001]                 | -0.173 [0.014,<br>p<0.001]             | -0.207<br>[0.0149,<br>p<0.001]             | 0.0410 [0.017,<br>p<0.05]                 |
| COPD *EF                                                | -                            | -                              | -                                                  | <b>0.205 [0.036,</b><br><b>p&lt;0.001]</b> | -                                      | <b>0.195 [0.034,</b><br><b>p&lt;0.001]</b> | <b>0.096 [0.037,</b><br><b>p&lt;0.05]</b> |
| Asthma*EF                                               | -                            | -                              | -                                                  | <b>0.018 [0.058,</b><br><b>p=0.753]</b>    | <b>0.013 [0.05,</b><br><b>p=0.797]</b> | -                                          | -                                         |
| COPD*Asthma*EF                                          | -                            | -                              | -                                                  | <b>-0.093 [0.112,</b><br><b>p=0.402]</b>   | -                                      | -                                          | -                                         |
| Age                                                     | -                            | -                              | -                                                  | -                                          | -                                      | -                                          | 0.553 [0.0101,<br>p<0.001]                |
| Female (vs. male)                                       | -                            | -                              | -                                                  | -                                          | -                                      | -                                          | -0.0922 [0.0150,<br>p<0.001]              |

|                                              |          |          |          |          |          |          |                           |
|----------------------------------------------|----------|----------|----------|----------|----------|----------|---------------------------|
| Valve disease                                | -        | -        | -        | -        | -        | -        | 0.219 [0.0169, p<0.001]   |
| IHD                                          | -        | -        | -        | -        | -        | -        | 0.1204 [0.015, p<0.001]   |
| Hypertension                                 | -        | -        | -        | -        | -        | -        | -0.220 [0.0148, p<0.001]  |
| Diabetes                                     | -        | -        | -        | -        | -        | -        | 0.0489 [0.0164, p<0.01]   |
| AF                                           | -        | -        | -        | -        | -        | -        | -0.0056 [0.0147, p=0.703] |
| NYHA                                         | -        | -        | -        | -        | -        | -        | 0.116 [0.018, p<0.001]    |
| Place of care (cardiology vs not cardiology) | -        | -        | -        | -        | -        | -        | -0.363 [0.0168, p<0.001]  |
| <b>Random effects (hospitals, n=219)</b>     |          |          |          |          |          |          |                           |
| Variance                                     | 0.205    | 0.208    | 0.208    | 0.201    | 0.201    | 0.201    | 0.159                     |
| SD                                           | 0.453    | 0.456    | 0.456    | 0.448    | 0.449    | 0.449    | 0.399                     |
| AIC                                          | 160533.4 | 158837.1 | 158836.2 | 158652.0 | 158681.2 | 158649.7 | 133038.5                  |

## Abbreviations

AIC= Akaike information criterion; AF= atrial fibrillation; COPD= chronic obstructive pulmonary disease; CI=confidence intervals; EF= ejection fraction; NYHA= New York Heart Association; IHD= ischemic heart disease; SD= standard deviation; SE= standard error

Results from a 2-level unconditional model that included COPD as fixed-effect and hospital as random effect suggested COPD was associated with an increase in the estimate for in-hospital mortality. The addition of asthma to this model indicated it had an inverse relationship with likelihood of death. A test for the interaction between COPD and asthma was not significant, thus, it was not considered in subsequent analyses. Further, we wanted to assess whether the effects of COPD, respectively asthma on in-hospital death are different with respect to EF status group therefore, we added a three-way interaction between COPD, asthma and EF to the model. We detected a significant interaction between COPD and EF only, suggesting the effect of COPD only, not asthma would

be differential according to the EF status. In the final model, we estimated the association between COPD and mortality in HFrEF and in HFpEF and adjusted for baseline covariates.

**Table 4.** Association between COPD, asthma and in-hospital death

| Predictors                                                                                                                                                           | COPD only (95% CI)        | COPD + asthma             | Fully adjusted model      | Model with COPD and EF interaction, fully adjusted OR (95% CI) |
|----------------------------------------------------------------------------------------------------------------------------------------------------------------------|---------------------------|---------------------------|---------------------------|----------------------------------------------------------------|
| <b>Fixed effects (95% CI)</b>                                                                                                                                        |                           |                           |                           | P-value for interaction =0.01                                  |
| COPD                                                                                                                                                                 | <b>1.07 (1.03 – 1.10)</b> | <b>1.07 (1.04-1.11)</b>   | <b>1.10 (1.06 – 1.14)</b> | 1.04 (0.99-1.10)                                               |
| Asthma                                                                                                                                                               | -                         | <b>0.77 (0.73 – 0.80)</b> | <b>0.84 (0.79, 0.88)</b>  | 0.83 (0.79-0.88)                                               |
| COPD (Yes vs. No): HFpEF                                                                                                                                             | -                         | -                         | -                         | <b>1.05 (0.99 – 1.10)</b>                                      |
| COPD (Yes vs. No): HFrEF                                                                                                                                             | -                         | -                         | -                         | <b>1.15 (1.09 – 1.21)</b>                                      |
| Age                                                                                                                                                                  | -                         |                           | 1.74 (1.71 -1.78)         | 1.74 (1.71-1.77)                                               |
| Female (vs. male)                                                                                                                                                    | -                         |                           | 0.91 (0.89-0.94)          | 0.91 (0.89-0.94)                                               |
| Valve disease                                                                                                                                                        | -                         |                           | 1.25 (1.20-1.29)          | 1.25 (1.20-1.29)                                               |
| IHD                                                                                                                                                                  | -                         |                           | 1.12 (1.10-1.16)          | 1.13 (1.10-1.16)                                               |
| Hypertension                                                                                                                                                         | -                         |                           | 0.8 (0.78-0.83)           | 0.80 (0.78-0.83)                                               |
| Diabetes                                                                                                                                                             | -                         |                           | 1.05 (1.02-1.08)          | 1.05 (1.02-1.08)                                               |
| AF                                                                                                                                                                   | -                         |                           | 0.99 (0.97-1.02)          | 0.99 (0.96-1.02)                                               |
| NYHA (III/IV vs. I/II)                                                                                                                                               | -                         |                           | 1.12 (1.08-1.17)          | 1.12 (1.08-1.17)                                               |
| Place of care (cardiology vs. not cardiology ward)                                                                                                                   | -                         |                           | 0.69 (0.67-0.72)          | 0.69 (0.67-0.71)                                               |
| <i>Random effects (Variance)</i>                                                                                                                                     |                           |                           |                           |                                                                |
| <i>LR test p-value</i>                                                                                                                                               | P<0.001                   | P<0.001                   | P<0.001                   | P<0.001                                                        |
| Likelihood ratio test comparing fixed to random effects for hospital model fit, significant indicates random effects model performed better than fixed effects model |                           |                           |                           |                                                                |
| Abbreviations                                                                                                                                                        |                           |                           |                           |                                                                |



AF= atrial fibrillation; COPD= chronic obstructive pulmonary disease; CI=confidence intervals; EF= ejection fraction; LR= Likelihood ratio test; NYHA= New York Heart Association; IHD= ischemic heart disease; SD= standard deviation.

**Table 5.** Association between COPD and in-hospital mortality in patients hospitalised with heart failure. Results from 20 models using imputed smoking status and BMI (estimates combined using Rubin's rule).

|                                                                                                                                                                                                                                                             | Fully adjusted model, OR (95% CI) |
|-------------------------------------------------------------------------------------------------------------------------------------------------------------------------------------------------------------------------------------------------------------|-----------------------------------|
| <b>Fixed effects (95% CI)</b>                                                                                                                                                                                                                               |                                   |
| COPD                                                                                                                                                                                                                                                        | 1.12 (1.07 – 1.17)                |
| Asthma                                                                                                                                                                                                                                                      | 0.84 (0.80 – 0.90)                |
| Age                                                                                                                                                                                                                                                         | 1.67 (1.62 – 1.71)                |
| Female (vs. male)                                                                                                                                                                                                                                           | 0.89 (0.86 – 0.92)                |
| Valve disease                                                                                                                                                                                                                                               | 1.22 (1.18 – 1.26)                |
| IHD                                                                                                                                                                                                                                                         | 1.13 (1.10 – 1.17)                |
| Hypertension                                                                                                                                                                                                                                                | 0.82 (0.89 – 0.85)                |
| Diabetes                                                                                                                                                                                                                                                    | 1.12 (1.08 – 1.15)                |
| AF                                                                                                                                                                                                                                                          | 1.01 (0.98 – 1.04)                |
| NYHA (III/IV vs. I/II)                                                                                                                                                                                                                                      | 1.15 (1.10 – 1.20)                |
| Place of care (cardiology vs. no cardiology ward)                                                                                                                                                                                                           | 0.70 (0.69 – 0.73)                |
| EF                                                                                                                                                                                                                                                          | 1.03 (0.99 – 1.06)                |
| <i>Smoking status (ref: Current smoker)</i>                                                                                                                                                                                                                 |                                   |
| Ex-smoker                                                                                                                                                                                                                                                   | 0.90 (0.77 – 1.06)                |
| Never                                                                                                                                                                                                                                                       | 1 (0.84 – 1.19)                   |
| <i>BMI (ref: normal weight)</i>                                                                                                                                                                                                                             |                                   |
| Underweight                                                                                                                                                                                                                                                 | 1.31 (1.21 – 1.43)                |
| Overweight                                                                                                                                                                                                                                                  | 0.86 (0.81 – 0.91)                |
| Obese                                                                                                                                                                                                                                                       | 0.77 (0.73 – 0.81)                |
| <i>Random effects (Variance)</i>                                                                                                                                                                                                                            |                                   |
| <i>LR test p-value</i>                                                                                                                                                                                                                                      | P<0.001                           |
| Abbreviations<br>AF= atrial fibrillation; BMI= Body Mass index; CI= confidence intervals; COPD= chronic obstructive pulmonary disease; EF= ejection fraction; IHD= ischemic heart disease; NYHA= New York Heart Association; OR= Odds ratio; ref= reference |                                   |

**Table 6.** Association between COPD and in-hospital mortality in patients hospitalised with a confirmed diagnosis of HF.

|                                                                                                                                                                                                                                                                                        | Fully adjusted model, OR (95% CI) |
|----------------------------------------------------------------------------------------------------------------------------------------------------------------------------------------------------------------------------------------------------------------------------------------|-----------------------------------|
| <b>Fixed effects (95% CI)</b>                                                                                                                                                                                                                                                          |                                   |
| COPD                                                                                                                                                                                                                                                                                   | 1.11 (1.07 - 1.16)                |
| Asthma                                                                                                                                                                                                                                                                                 | 0.84 (0.79 - 0.89)                |
| Age                                                                                                                                                                                                                                                                                    | 1.04 (1.04 - 1.05)                |
| Female (vs. male)                                                                                                                                                                                                                                                                      | 0.91 (0.88 - 0.94)                |
| Valve disease                                                                                                                                                                                                                                                                          | 1.26 (1.22 - 1.30)                |
| IHD                                                                                                                                                                                                                                                                                    | 1.15 (1.11 - 1.18)                |
| Hypertension                                                                                                                                                                                                                                                                           | 0.81 (0.79 - 0.84)                |
| Diabetes                                                                                                                                                                                                                                                                               | 1.06 (1.03 - 1.10)                |
| AF                                                                                                                                                                                                                                                                                     | 0.98 (0.95 - 1.01)                |
| NYHA (III/IV vs. I/II)                                                                                                                                                                                                                                                                 | 1.13 (1.08 - 1.18)                |
| Place of care (cardiology vs. no cardiology ward)                                                                                                                                                                                                                                      | 0.69 (0.66 - 0.71)                |
| EF                                                                                                                                                                                                                                                                                     | 1.04 (1.01 - 1.08)                |
| <i>Random effects (Variance)</i>                                                                                                                                                                                                                                                       | 0.166                             |
| <i>LR test p-value</i>                                                                                                                                                                                                                                                                 | p<0.001                           |
| Abbreviations<br>AF= atrial fibrillation; BMI= Body Mass index; CI= confidence intervals; COPD= chronic obstructive pulmonary disease; EF= ejection fraction; IHD= ischemic heart disease; LR= Likelihood ratio test; NYHA= New York Heart Association; OR= Odds ratio; ref= reference |                                   |

**Table 7.** Variables with considerable missingness in the National Heart Failure Audit 2012-2018

|                                       | <b>HF alone<br/>(N=170297)</b> | <b>COPD + HF<br/>(N=32695)</b> | <b>Asthma + HF<br/>(N=14400)</b> | <b>Overall<br/>(N=217392)</b> |
|---------------------------------------|--------------------------------|--------------------------------|----------------------------------|-------------------------------|
| <b>Cerebrovascular accident</b>       | 2882 (1.7%)                    | 582 (1.8%)                     | 244 (1.7%)                       | 3708 (1.7%)                   |
| Missing                               | 145636 (85.5%)                 | 28115 (86.0%)                  | 12279 (85.3%)                    | 186030 (85.6%)                |
| <b>Alcohol units/week</b>             |                                |                                |                                  |                               |
| Median [Q1, Q3]                       | 0 [0, 1.00]                    | 0 [0, 2.00]                    | 0 [0, 0]                         | 0 [0, 1.00]                   |
| Missing                               | 159233 (93.5%)                 | 30570 (93.5%)                  | 13314 (92.5%)                    | 203117 (93.4%)                |
| <b>Smoking status</b>                 |                                |                                |                                  |                               |
| Current smoker                        | 1869 (1.1%)                    | 911 (2.8%)                     | 143 (1.0%)                       | 2923 (1.3%)                   |
| Ex-smoker                             | 8371 (4.9%)                    | 2505 (7.7%)                    | 715 (5.0%)                       | 11591 (5.3%)                  |
| Never-smoker                          | 8823 (5.2%)                    | 673 (2.1%)                     | 896 (6.2%)                       | 10392 (4.8%)                  |
| Missing                               | 151234 (88.8%)                 | 28606 (87.5%)                  | 12646 (87.8%)                    | 192486 (88.5%)                |
| <b>Chest X-ray (pulmonary oedema)</b> | 3954 (2.3%)                    | 692 (2.1%)                     | 334 (2.3%)                       | 4980 (2.3%)                   |
| Missing                               | 157253 (92.3%)                 | 30528 (93.4%)                  | 13311 (92.4%)                    | 201092 (92.5%)                |
| <b>Medications at admission</b>       |                                |                                |                                  |                               |
| <b>ACEi</b>                           | 6316 (3.7%)                    | 1116 (3.4%)                    | 513 (3.6%)                       | 7945 (3.7%)                   |
| Contraindicated                       | 592 (0.3%)                     | 140 (0.4%)                     | 59 (0.4%)                        | 791 (0.4%)                    |
| Missing                               | 152642 (89.6%)                 | 29598 (90.5%)                  | 12903 (89.6%)                    | 195143 (89.8%)                |
| <b>ARB</b>                            | 2392 (1.4%)                    | 453 (1.4%)                     | 305 (2.1%)                       | 3150 (1.4%)                   |
| Not applicable                        | 2570 (1.5%)                    | 513 (1.6%)                     | 240 (1.7%)                       | 3323 (1.5%)                   |
| Stopped                               | 0 (0%)                         | 0 (0%)                         | 0 (0%)                           | 0 (0%)                        |
| Contraindicated                       | 338 (0.2%)                     | 88 (0.3%)                      | 32 (0.2%)                        | 458 (0.2%)                    |
| Missing                               | 151870 (89.2%)                 | 29463 (90.1%)                  | 12781 (88.8%)                    | 194114 (89.3%)                |
| <b>Beta-blocker</b>                   | 9516 (5.6%)                    | 1446 (4.4%)                    | 598 (4.2%)                       | 11560 (5.3%)                  |
| Not applicable                        | 762 (0.4%)                     | 144 (0.4%)                     | 88 (0.6%)                        | 994 (0.5%)                    |
| Contraindicated                       | 153 (0.1%)                     | 136 (0.4%)                     | 74 (0.5%)                        | 363 (0.2%)                    |
| Missing                               | 151820 (89.2%)                 | 29481 (90.2%)                  | 12831 (89.1%)                    | 194132 (89.3%)                |
| <b>Loop diuretic</b>                  | 5519 (3.2%)                    | 1202 (3.7%)                    | 490 (3.4%)                       | 7211 (3.3%)                   |

|                                                                                                                                                                                                                                                                           |                   |                   |                   |                   |
|---------------------------------------------------------------------------------------------------------------------------------------------------------------------------------------------------------------------------------------------------------------------------|-------------------|-------------------|-------------------|-------------------|
| Missing                                                                                                                                                                                                                                                                   | 160255 (94.1%)    | 30820 (94.3%)     | 13532 (94.0%)     | 204607 (94.1%)    |
| <b>Thiazide or Metolazone</b>                                                                                                                                                                                                                                             | 925 (0.5%)        | 140 (0.4%)        | 81 (0.6%)         | 1146 (0.5%)       |
| Stopped*                                                                                                                                                                                                                                                                  | -                 | -                 | -                 | -                 |
| Missing                                                                                                                                                                                                                                                                   | 152559 (89.6%)    | 29604 (90.5%)     | 12891 (89.5%)     | 195054 (89.7%)    |
| <b>MRA</b>                                                                                                                                                                                                                                                                | 2356 (1.4%)       | 502 (1.5%)        | 221 (1.5%)        | 3079 (1.4%)       |
| Not applicable                                                                                                                                                                                                                                                            | 225 (0.1%)        | 45 (0.1%)         | 27 (0.2%)         | 297 (0.1%)        |
| Contraindicated                                                                                                                                                                                                                                                           | 36 (0.0%)         | *                 | *                 | 42 (0.0%)         |
| Missing                                                                                                                                                                                                                                                                   | 152494 (89.5%)    | 29570 (90.4%)     | 12885 (89.5%)     | 194949 (89.7%)    |
| <b>Digoxin</b>                                                                                                                                                                                                                                                            | 1700 (1.0%)       | 399 (1.2%)        | 168 (1.2%)        | 2267 (1.0%)       |
| Missing                                                                                                                                                                                                                                                                   | 152631 (89.6%)    | 29622 (90.6%)     | 12874 (89.4%)     | 195127 (89.8%)    |
| CCB                                                                                                                                                                                                                                                                       | 2847 (1.7%)       | 479 (1.5%)        | 280 (1.9%)        | 3606 (1.7%)       |
| Missing                                                                                                                                                                                                                                                                   | 155279 (91.2%)    | 30261 (92.6%)     | 13150 (91.3%)     | 198690 (91.4%)    |
| <b>Bronchodilators</b>                                                                                                                                                                                                                                                    | 919 (0.5%)        | 1390 (4.3%)       | 750 (5.2%)        | 3059 (1.4%)       |
| Missing                                                                                                                                                                                                                                                                   | 155316 (91.2%)    | 30248 (92.5%)     | 13136 (91.2%)     | 198700 (91.4%)    |
| <b>Ivabradine</b>                                                                                                                                                                                                                                                         | 186 (0.1%)        | 64 (0.2%)         | 31 (0.2%)         | 281 (0.1%)        |
| Missing                                                                                                                                                                                                                                                                   | 153320 (90%)      | 29666 (90.7%)     | 12845 (89.2%)     | 195831 (90.1%)    |
| <b>BMI</b>                                                                                                                                                                                                                                                                |                   |                   |                   |                   |
| Median [Q1, Q3]                                                                                                                                                                                                                                                           | 26.5 [22.9, 31.1] | 27.1 [22.8, 32.2] | 28.0 [23.6, 33.7] | 26.7 [22.9, 31.4] |
| Missing                                                                                                                                                                                                                                                                   | 125287 (73.6%)    | 23693 (72.5%)     | 10274 (71.3%)     | 159254 (73.3%)    |
| <b>BNP</b>                                                                                                                                                                                                                                                                |                   |                   |                   |                   |
| Median [Q1, Q3]                                                                                                                                                                                                                                                           | 428 [1.00, 1100]  | 350 [1.00, 985]   | 353 [1.00, 871]   | 412 [1.00, 1070]  |
| Missing                                                                                                                                                                                                                                                                   | 153043 (89.9%)    | 29385 (89.9%)     | 12978 (90.1%)     | 195406 (89.9%)    |
| <b>NT_proBNP</b>                                                                                                                                                                                                                                                          |                   |                   |                   |                   |
| Median [Q1, Q3]                                                                                                                                                                                                                                                           | 2790 [404, 7530]  | 2490 [349, 6820]  | 2440 [426, 6330]  | 2700 [393, 7320]  |
| Missing                                                                                                                                                                                                                                                                   | 153022 (89.9%)    | 29161 (89.2%)     | 12818 (89.0%)     | 195001 (89.7%)    |
| *not shown due to small numbers policy<br>ACEi= angiotensin-converting-enzyme inhibitors; ARB= angiotensin receptor blockers; BMI= Body mass index; BNP= brain natriuretic peptide; NT_proBNP= N-terminal (NT)-pro hormone BNP; MRA=mineralocorticoid receptor antagonist |                   |                   |                   |                   |

**Figure 1.** Study flow

HF= heart failure; COPD=chronic obstructive pulmonary disease

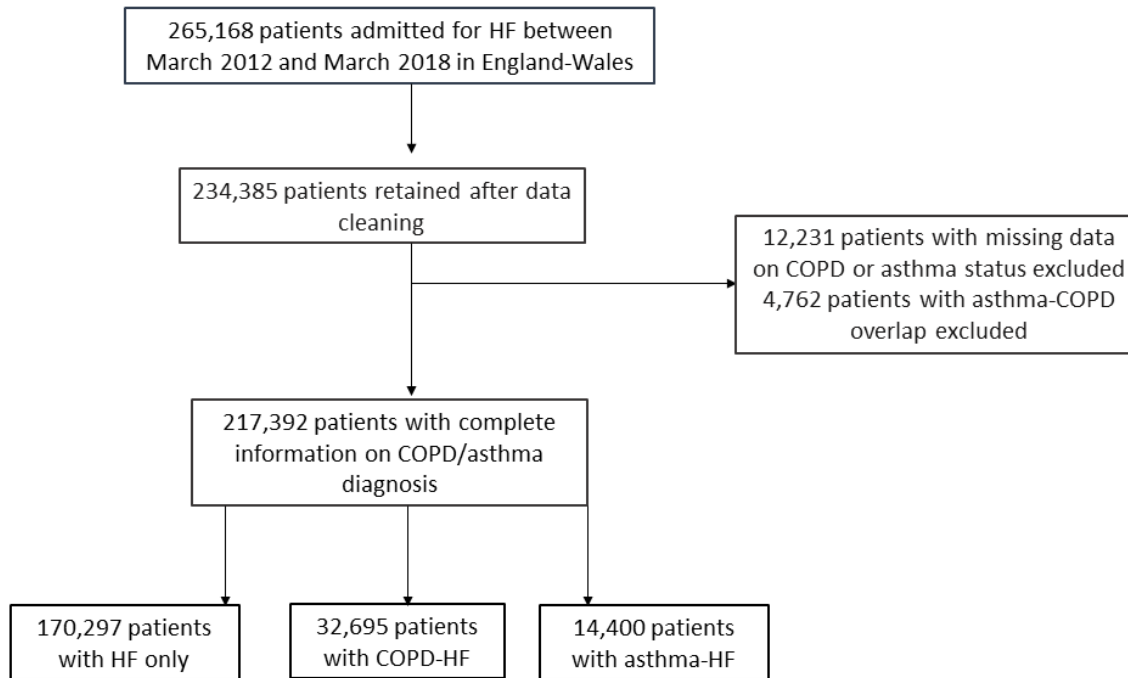

### Supplemental references

1. Shoaib A, Mamas MA, Ahmad QS, et al. Characteristics and outcome of acute heart failure patients according to the severity of peripheral oedema. *Int J Cardiol* 2019;285:40-46. doi: 10.1016/j.ijcard.2019.03.020 [published Online First: 2019/03/25]
2. Conrad N, Judge A, Tran J, et al. Temporal trends and patterns in heart failure incidence: a population-based study of 4 million individuals. *The Lancet* 2018;391(10120):572-80. doi: 10.1016/s0140-6736(17)32520-5
3. Lawson CA, Mamas MA, Jones PW, et al. Association of Medication Intensity and Stages of Airflow Limitation With the Risk of Hospitalization or Death in Patients With Heart Failure and Chronic Obstructive Pulmonary Disease. *JAMA Netw Open* 2018;1(8):e185489. doi: 10.1001/jamanetworkopen.2018.5489 [published Online First: 2019/01/16]
4. Quartagno M, Grund S, and Carpenter J. Jomo: a flexible package for two-level joint modelling multiple imputation. *R Journal* 2019;9.1
